# Supplementary material for: Oxidative selenofunctionalization of allenes: convenient access to 2-(phenylselanyl)-but-2-enals and 4-oxo-3-(phenylselanyl)pent-2-enoates
Source: Royal Society of Chemistry journal article supplement (doi:10.1039/c9qo00561g), 2019-01-01

## Supporting Information for the Paper

# Oxidative Selenofunctionalization of Allenes: Convenient Access to 2-(Phenylselanyl)-but-2-enals and 4-Oxo-3-(phenylselanyl)pent-2-enoates

Benito Alcaide,<sup>\*,a</sup> Pedro Almendros,<sup>\*,b</sup> Teresa Martínez del Campo,<sup>a</sup> Laura Martín,<sup>a</sup> Guillermo Palop,<sup>a</sup> and Mireia Toledano-Pinedo<sup>a</sup>

<sup>a</sup>Grupo de Lactamas y Heterociclos Bioactivos, Departamento de Química Orgánica I, Unidad Asociada al CSIC, Facultad de Química, Universidad Complutense de Madrid, 28040-Madrid, Spain

<sup>b</sup>Instituto de Química Orgánica General, IQOG, CSIC, Juan de la Cierva 3, 28006-Madrid, Spain

E-mail: [alcaideb@quim.ucm.es](mailto:alcaideb@quim.ucm.es); [palmendros@iqog.csic.es](mailto:palmendros@iqog.csic.es)

### Table of Contents

|                                                                                       |         |
|---------------------------------------------------------------------------------------|---------|
| General Methods                                                                       | S1      |
| Experimental Section                                                                  | S2–S19  |
| <sup>1</sup> H NMR, NOESY, <sup>13</sup> C NMR, <sup>77</sup> Se NMR and HRMS Spectra | S20–S80 |

**General methods:** <sup>1</sup>H NMR and <sup>13</sup>C NMR spectra were recorded on a Bruker Avance-300 spectrometer. NMR spectra were recorded in CDCl<sub>3</sub> or C<sub>6</sub>D<sub>6</sub>, except otherwise stated. Chemical shifts are given in ppm relative to TMS (<sup>1</sup>H, 0.00 ppm), or CDCl<sub>3</sub> (<sup>1</sup>H, 7.27 ppm; <sup>13</sup>C, 77.0 ppm), or C<sub>6</sub>D<sub>6</sub> (<sup>1</sup>H, 7.16 ppm; <sup>13</sup>C, 128.0 ppm). Chemical shifts in <sup>77</sup>Se are given in ppm relative to PhSeSePh in CDCl<sub>3</sub> (<sup>77</sup>Se, 0.00 ppm). Low and high resolution mass spectra were taken on an AGILENT 6520 Accurate-Mass QTOF LC/MS spectrometer using the electrospray mode (ES)

unless otherwise stated. IR spectra were recorded on a Bruker Tensor 27 spectrometer. All commercially available compounds were used without further purification.

**These precursors were readily obtained as described in the literature: 1a and 1g** (Lin, M.-H.; Tsai, W.-S.; Lin, L.-Z.; Hung, S.-F.; Chuang, T.-H.; Su, Y.-J. *J. Org. Chem.* **2011**, *76*, 8518); **1d** (Luo, H.; Ma, S. *Eur. J. Org. Chem.* **2013**, 3041).

**General Procedure for the Preparation of Allenes 1b–f and 1h.** A well stirred solution of  $(\text{CH}_2\text{O})_n$  (0.5 mmol), CuI (0.1 mmol), the appropriate alkyne (0.2 mmol), and *N,N*-diisopropylethylamine (Hünig's base) (0.36 mmol) in dioxane (1 mL) was refluxed under argon atmosphere. When the reaction was completed as monitored by TLC, it was cooled to RT. Water (5 mL) was added before being extracted with ethyl acetate (3 x 15 mL). The organic phase was washed with water (2 x 5 mL), dried ( $\text{MgSO}_4$ ) and concentrated under reduced pressure. Chromatography of the residue eluting with hexanes/ethyl acetate mixtures gave analytically pure compounds **1**. Spectroscopic and analytical data for allenes **1** follow.

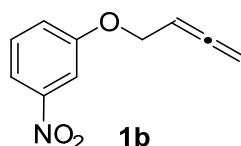

**Allene 1b.** From 398 mg (2.25 mmol) of the corresponding alkyne, and after chromatography of the residue using hexanes/ethyl acetate (10:1) as eluent gave compound **1b** (260 mg, 60%) as a colorless oil;  $^1\text{H}$  NMR (300 MHz,  $\text{CDCl}_3$ , 25 °C):  $\delta$  = 7.75 (ddd, 1H,  $J$  = 8.1, 2.1, 0.9 Hz, ArH), 7.69 (t, 1H,  $J$  = 2.3 Hz, ArH), 7.35 (t, 1H,  $J$  = 8.2 Hz, ArH), 7.16 (ddd, 1H,  $J$  = 8.3, 2.5, 0.9 Hz, ArH), 5.30 (q, 1H,  $J$  = 6.7 Hz, =CH), 4.84 (dt, 2H,  $J$  = 6.6, 2.5 Hz,  $\text{CH}_2$ ), 4.58 (dt, 2H,  $J$  = 6.8, 2.5 Hz, = $\text{CH}_2$ );  $^{13}\text{C}$  NMR (75 MHz,  $\text{CDCl}_3$ , 25 °C):  $\delta$  = 209.9 (C=C=CH<sub>2</sub>), 158.9, 149.3, 130.0 (Ar, CH), 122.2 (Ar, CH), 116.1 (Ar, CH), 109.4 (Ar, CH), 86.3 (=CH), 77.2 (=CH<sub>2</sub>), 66.6 (CH<sub>2</sub>); IR ( $\text{CHCl}_3$ ,  $\text{cm}^{-1}$ ):  $\nu$  = 3100, 1958, 1529, 1350.

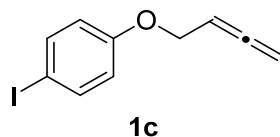

**Allene 1c.** From 371 mg (1.43 mmol) of the corresponding alkyne, and after chromatography of the residue using hexanes/ethyl acetate (10:1) as eluent gave compound **1c** (228 mg, 59%) as a colorless oil;  $^1\text{H}$  NMR (300 MHz,  $\text{CDCl}_3$ , 25 °C):  $\delta$  = 7.51–7.44 (m, 2H, ArH), 6.65–6.58 (m, 2H, ArH), 5.29 (q, 1H,  $J$  = 6.7 Hz, =CH), 4.79 (dt, 2H,  $J$  = 6.6, 2.5 Hz,  $\text{CH}_2$ ), 4.46 (dt, 2H,  $J$  = 6.8, 2.5 Hz, = $\text{CH}_2$ );  $^{13}\text{C}$  NMR (75 MHz,  $\text{CDCl}_3$ , 25 °C):  $\delta$  = 209.6 ( $\text{C}=\text{C}=\text{CH}_2$ ), 158.3, 138.3 (Ar, 2CH), 117.4 (Ar, 2CH), 86.9 (=CH), 83.2, 76.9 (=CH $_2$ ), 66.0 ( $\text{CH}_2$ ); IR ( $\text{CHCl}_3$ ,  $\text{cm}^{-1}$ ):  $\nu$  = 2984, 1956, 1735, 1483, 1236.

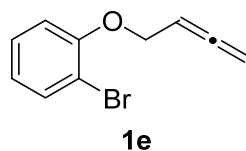

**Allene 1e.** From 500 mg (2.37 mmol) of the corresponding alkyne, and after chromatography of the residue using hexanes/ethyl acetate (20:1) as eluent gave compound **1e** (324 mg, 61%) as a colorless oil;  $^1\text{H}$  NMR (300 MHz,  $\text{CDCl}_3$ , 25 °C):  $\delta$  = 7.46 (dd, 1H,  $J$  = 7.9, 1.6 Hz, ArH), 7.17 (m, 1H, ArH), 6.85 (dd, 1H,  $J$  = 8.3, 1.3 Hz, ArH), 6.77 (td, 1H,  $J$  = 8.5, 1.4 Hz, ArH), 5.33 (q, 1H,  $J$  = 7.4 Hz, =CH), 4.80 (dt, 2H,  $J$  = 6.6, 2.5 Hz,  $\text{CH}_2$ ), 4.58 (dt, 2H,  $J$  = 6.8, 2.5 Hz, = $\text{CH}_2$ );  $^{13}\text{C}$  NMR (75 MHz,  $\text{CDCl}_3$ , 25 °C):  $\delta$  = 209.7 ( $\text{C}=\text{C}=\text{CH}_2$ ), 154.90, 133.6 (Ar, CH), 128.5 (Ar, CH), 122.3 (Ar, CH), 114.1 (Ar, CH), 112.6, 86.9 (=CH), 76.9 (=CH $_2$ ), 67.2 ( $\text{CH}_2$ ); IR ( $\text{CHCl}_3$ ,  $\text{cm}^{-1}$ ):  $\nu$  = 3065, 1955, 1475, 744.

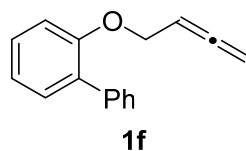

**Allene 1f.** From 417 mg (2.37 mmol) of the corresponding alkyne, and after chromatography of the residue using hexanes/ethyl acetate (20:1) as eluent gave compound **1f** (303 mg, 68%) as a colorless oil;  $^1\text{H}$  NMR (300 MHz,  $\text{CDCl}_3$ , 25 °C):  $\delta$  = 7.57 (ddd, 2H,  $J$  = 4.2, 3.5, 1.8 Hz, ArH), 7.46–7.38 (m, 2H, ArH), 7.38–7.33 (m, 2H, ArH), 7.31 (ddd, 1H,  $J$  = 7.4, 4.1, 1.8 Hz, ArH), 7.10–7.00 (m, 2H, ArH), 5.34 (q, 1H,  $J$  = 6.6 Hz, =CH), 4.84 (dt, 2H,  $J$  = 6.6, 2.7 Hz,  $\text{CH}_2$ ), 4.59 (dt, 2H,  $J$  = 6.5, 2.7 Hz, = $\text{CH}_2$ );  $^{13}\text{C}$  NMR (75 MHz,  $\text{CDCl}_3$ , 25 °C):  $\delta$  = 209.3 ( $\text{C}=\text{C}=\text{CH}_2$ ), 155.4, 138.6, 131.4 (Ar,

CH), 131.2, 129.7 (Ar, CH), 128.6 (Ar, CH), 128.0 (Ar, CH), 126.9 (Ar, CH), 121.4 (Ar, CH), 113.5 (Ar, CH), 87.45 (=CH), 76.7 (=CH<sub>2</sub>), 66.4 (CH<sub>2</sub>); IR (CHCl<sub>3</sub>, cm<sup>-1</sup>):  $\nu$  = 3060, 1956, 1479, 1210, 697.

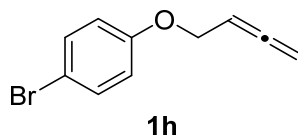

**Allene 1h.** From 291 mg (1.38 mmol) of the corresponding alkyne, and after chromatography of the residue using hexanes/ethyl acetate (8:1) as eluent gave compound **1h** (210 mg, 68%) as a colorless oil; <sup>1</sup>H NMR (300 MHz, CDCl<sub>3</sub>, 25 °C):  $\delta$  = 7.37(d, 2H,  $J$  = 8.9 Hz), 6.80 (d, 2H,  $J$  = 8.9 Hz), 5.37 (q, 1H,  $J$  = 6.7 Hz), 4.87 (m, 2H), 4.54 (m, 2H); <sup>13</sup>C NMR (75 MHz, CDCl<sub>3</sub>, 25 °C):  $\delta$  = 209.4, 157.4, 132.2 (2C), 116.6 (2C), 113.1, 86.7, 76.7, 66.0; IR (CHCl<sub>3</sub>, cm<sup>-1</sup>):  $\nu$  = 3054, 1955, 1481, 1233.

**General Procedure for the Preparation of Allenes 2a, 2c, and 2e–h.** CuI (0.50 mmol), EDA (1.50 mmol) and Et<sub>3</sub>N (1.50 mmol) were added to a solution of the corresponding alkyne (1.00 mmol) in CH<sub>3</sub>CN (5.39 mL). The mixture was allowed to react until the reaction was completed (TLC). Once finished, NH<sub>4</sub>Cl (30 mL) was added to the solution, and then it extracted three times with AcOEt (3 x 20 mL). The organic phase was washed with water (2 x 5 mL), dried (MgSO<sub>4</sub>) and concentrated under reduced pressure. Chromatography of the residue eluting with hexanes/ethyl acetate mixtures gave compounds **2** containing a small proportion of the isomeric alkyne (less than 5% as observed in H-NMR). Spectroscopic and analytical data for allenes **2** follow.

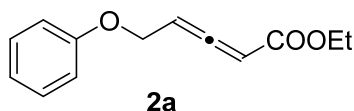

**Allene 2a.** From 270 mg (2.04 mmol) of the corresponding alkyne, and after chromatography of the residue using hexanes/ethyl acetate (10:1) as eluent gave compound **2a** (188 mg, 40%) as a colorless oil; <sup>1</sup>H NMR (300 MHz, CDCl<sub>3</sub>, 25 °C):  $\delta$  = 7.20 (td, 2H,  $J$  = 9.0 Hz,  $J$  = 3.0 Hz, ArH), 6.90 (td, 3H,  $J$  = 9.0 Hz,  $J$  = 3.0 Hz, ArH), 5.74 (dt, 1H,  $J$  = 6.0 Hz,  $J$  = 3.0 Hz, CH) 5.47 (q, 1H,  $J$  = 6.0 Hz, CH), 4.24 (dt, 2H,  $J$  = 6.0 Hz,  $J$  = 3.0 Hz, OCH<sub>2</sub>), 4.06 (qd, 2H,  $J$  = 6.0 Hz,  $J$  = 3.0 Hz,

OCH<sub>2</sub>-CH<sub>3</sub>), 1.02 (t, 3H, *J* = 6.0 Hz, CH<sub>3</sub>); <sup>13</sup>C NMR (75 MHz, CDCl<sub>3</sub>, 25 °C): δ = 212.7 (=C=), 166.1 (CO), 159.0 (Ar, C), 130.1 (Ar, 2CH), 121.8 (Ar, CH), 115.6 (Ar, 2CH), 93.1 (=CH), 90.6 (=CH), 64.3 (OCH<sub>2</sub>), 61.3 (OCH<sub>2</sub>), 14.6 (CH<sub>3</sub>); IR (CHCl<sub>3</sub>, cm<sup>-1</sup>): ν = 1965, 1717, 1505, 1265, 1029; HRMS (ES): calcd for C<sub>13</sub>H<sub>15</sub>O<sub>3</sub> [*M* + H]<sup>+</sup>: 219.10157; found: 219.10229.

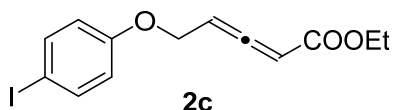

**Allene 2c.** From 319 mg (1.24 mmol) of the corresponding alkyne, and after chromatography of the residue using hexanes/ethyl acetate (10:1) as eluent gave compound **2c** (178 mg, 42%) as a colorless oil; <sup>1</sup>H NMR (300 MHz, CDCl<sub>3</sub>, 25 °C): δ = 7.56 (dt, 2H, *J* = 9.0 Hz, *J* = 3.0 Hz ArH), 6.71 (dt, 2H, *J* = 9.0 Hz, *J* = 3.0 Hz, ArH), 5.83 (q, 1H, *J* = 9.0 Hz, CH), 5.75 (dt, 1H, *J* = 9.0 Hz, *J* = 3.0 Hz, CH), 4.67 (dd, 2H, *J* = 6.0 Hz, *J* = 3.0 Hz, OCH<sub>2</sub>), 4.20 (qd, 2H, *J* = 6.0 Hz, *J* = 3.0 Hz, OCH<sub>2</sub>-CH<sub>3</sub>), 1.28 (t, 3H, *J* = 6.0 Hz, CH<sub>3</sub>); <sup>13</sup>C NMR (75 MHz, CDCl<sub>3</sub>, 25 °C): δ = 212.2 (=C=), 165.1 (CO), 157.8 (Ar, C), 138.3 (Ar, 2CH), 117.4 (Ar, 2CH), 92.3 (=CH), 90.4 (=CH), 83.5 (Ar, C), 64.2 (OCH<sub>2</sub>), 61.4 (OCH<sub>2</sub>), 14.2 (CH<sub>3</sub>); IR (CHCl<sub>3</sub>, cm<sup>-1</sup>): ν = 1967, 1712, 1483, 1234, 1173, 1018; HRMS (ES): calcd for C<sub>13</sub>H<sub>17</sub>INO<sub>3</sub> [*M* + NH<sub>4</sub>]<sup>+</sup>: 362.02476; found: 362.02521.

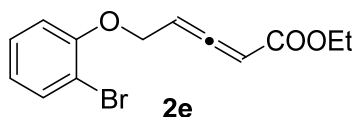

**Allene 2e.** From 650 mg (2.84 mmol) of the corresponding alkyne, and after chromatography of the residue using hexanes/ethyl acetate (10:1) as eluent gave compound **2e** (320 mg, 38%) as a colorless oil; <sup>1</sup>H NMR (300 MHz, CDCl<sub>3</sub>, 25 °C): δ = 7.47 (dd, 1H, *J* = 9.0 Hz, *J* = 3.0 Hz, ArH), 7.18 (td, 1H, *J* = 9.0 Hz, *J* = 3.0 Hz, ArH), 6.88 (dd, 1H, *J* = 6.0 Hz, *J* = 3.0 Hz, ArH), 6.79 (td, 1H, *J* = 6.0 Hz, *J* = 3.0 Hz, ArH), 5.81 (q, 1H, *J* = 6.0 Hz, CH), 5.69 (dt, 1H, *J* = 6.0 Hz, *J* = 3.0 Hz, CH), 4.71 (dd, 2H, *J* = 6.0 Hz, *J* = 3.0 Hz, OCH<sub>2</sub>), 4.12 (qd, 2H, *J* = 6.0 Hz, *J* = 3.0 Hz, OCH<sub>2</sub>-CH<sub>3</sub>), 1.20 (t, 3H, *J* = 6.0 Hz, CH<sub>3</sub>); <sup>13</sup>C NMR (75 MHz, CDCl<sub>3</sub>, 25 °C): δ = 212.3 (=C=), 166.1 (CO), 154.5 (Ar, C), 133.6 (Ar, CH), 128.4 (Ar, CH), 122.6 (Ar, CH), 114.7 (Ar, CH), 112.6 (Ar, C), 92.3 (=CH), 90.4 (=CH), 65.4 (OCH<sub>2</sub>), 61.2 (OCH<sub>2</sub>), 14.2 (CH<sub>3</sub>); IR (CHCl<sub>3</sub>, cm<sup>-1</sup>): ν = 1967, 1716, 1477, 1249, 1165, 1030; HRMS (ES): calcd for C<sub>13</sub>H<sub>14</sub>BrO<sub>3</sub> [*M* + H]<sup>+</sup>: 297.01208; found: 297.01314.

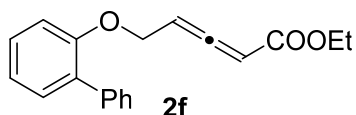

**Allene 2f.** From 200 mg (0.96 mmol) of the corresponding alkyne, and after chromatography of the residue using hexanes/ethyl acetate (10:1) as eluent gave compound **2f** (94 mg, 42%) as a colorless oil;  $^1\text{H NMR}$  (300 MHz,  $\text{CDCl}_3$ , 25  $^\circ\text{C}$ ):  $\delta$  = 7.54 (m, 2H, ArH), 7.35 (t, 5H,  $J$  = 7.4 Hz, ArH), 7.09 (td, 1H,  $J$  = 9.0 Hz,  $J$  = 3.0 Hz, ArH), 7.05 (td, 1H,  $J$  = 9.0 Hz,  $J$  = 3.0 Hz, ArH) 5.80 (q, 1H,  $J$  = 6.0 Hz, CH), 5.72 (dt, 1H,  $J$  = 6.0 Hz,  $J$  = 3.0 Hz CH), 4.70 (dd, 2H,  $J$  = 6.0 Hz,  $J$  = 3.0 Hz,  $\text{OCH}_2$ ), 4.22 (qd, 2H,  $J$  = 6.0 Hz,  $J$  = 3.0 Hz,  $\text{OCH}_2\text{-CH}_3$ ), 1.30 (t, 3H,  $J$  = 6.0 Hz,  $\text{CH}_3$ );  $^{13}\text{C NMR}$  (75 MHz,  $\text{CDCl}_3$ , 25  $^\circ\text{C}$ ):  $\delta$  = 212.0 ( $=\text{C}=\text{C}$ ), 165.3 (CO), 152.5 (Ar, C), 138.3 (Ar, C), 131.4 (Ar, C), 131.1 (Ar, CH), 129.6 (Ar, 2CH), 128.5 (Ar, CH), 127.9 (Ar, 2CH), 127.0 (Ar, CH), 121.7 (Ar, CH), 113.3 (Ar, CH), 92.7 ( $=\text{CH}$ ), 90.3 ( $=\text{CH}$ ), 64.6 ( $\text{OCH}_2$ ), 61.1 ( $\text{OCH}_2$ ), 14.2 ( $\text{CH}_3$ ); IR ( $\text{CHCl}_3$ ,  $\text{cm}^{-1}$ ):  $\nu$  = 1967, 1718, 1505, 1263, 1166, 1026; HRMS (ES): calcd for  $\text{C}_{19}\text{H}_{22}\text{NO}_3$  [ $M + \text{NH}_4$ ] $^+$ : 312.15942; found: 312.15978.

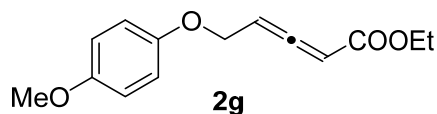

**Allene 2g.** From 153 mg (0.94 mmol) of the corresponding alkyne, and after chromatography of the residue using hexanes/ethyl acetate (10:1) as eluent gave compound **2g** (94 mg, 40%) as a colorless oil;  $^1\text{H NMR}$  (300 MHz,  $\text{CDCl}_3$ , 25  $^\circ\text{C}$ ):  $\delta$  = 6.85 (t, 4H,  $J$  = 9.0 Hz, ArH), 5.83 (q, 1H,  $J$  = 6.0 Hz, CH), 5.74 (dt, 1H,  $J$  = 6.0 Hz,  $J$  = 3.0 Hz, CH), 4.64 (dd, 2H,  $J$  = 6.0 Hz,  $J$  = 3.0 Hz,  $\text{OCH}_2$ ), 4.20 (qd, 2H,  $J$  = 6.0 Hz,  $J$  = 3.0 Hz,  $\text{OCH}_2\text{-CH}_3$ ), 3.77 (s, 3H, OMe), 1.28 (t, 3H,  $J$  = 6.0 Hz,  $\text{CH}_3$ );  $^{13}\text{C NMR}$  (75 MHz,  $\text{CDCl}_3$ , 25  $^\circ\text{C}$ ):  $\delta$  = 212.2 ( $=\text{C}=\text{C}$ ), 166.3 (CO), 154.3 (Ar, C), 151.1 (Ar, C), 116.1 (Ar, 2CH), 114.7 (Ar, 2CH), 92.7 ( $=\text{CH}$ ), 90.0 ( $=\text{CH}$ ), 65.0 ( $\text{OCH}_2$ ), 61.1 ( $\text{OCH}_2$ ), 55.7 ( $\text{OCH}_3$ ), 14.2 ( $\text{CH}_3$ ); IR ( $\text{CHCl}_3$ ,  $\text{cm}^{-1}$ ):  $\nu$  = 1967, 1718, 1508, 1230, 1174, 1037; HRMS (ES): calcd for  $\text{C}_{14}\text{H}_{17}\text{O}_4$  [ $M + \text{H}$ ] $^+$ : 249.11214; found: 249.11196.

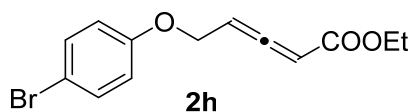

**Allene 2h.** From 228 mg (1.07 mmol) of the corresponding alkyne, and after chromatography of the residue using hexanes/ethyl acetate (10:1) as eluent gave compound **2h** (117 mg, 36%) as a

colorless oil;  $^1\text{H}$  NMR (300 MHz,  $\text{CDCl}_3$ , 25  $^\circ\text{C}$ ):  $\delta$  = 7.38 (dt, 2H,  $J$  = 9.0 Hz,  $J$  = 3.0 Hz, ArH), 6.81 (dt, 2H,  $J$  = 9.0 Hz,  $J$  = 3.0 Hz, ArH), 5.83 (q, 1H,  $J$  = 6.0 Hz, CH), 5.75 (dt, 1H,  $J$  = 6.0 Hz,  $J$  = 3.0 Hz, CH), 4.65 (dd, 2H,  $J$  = 6.0 Hz,  $J$  = 3.0 Hz,  $\text{OCH}_2$ ), 4.20 (qd, 2H,  $J$  = 6.0 Hz,  $J$  = 3.0 Hz,  $\text{OCH}_2\text{-CH}_3$ ), 1.28 (t, 3H,  $J$  = 6.0 Hz,  $\text{CH}_3$ );  $^{13}\text{C}$  NMR (75 MHz,  $\text{CDCl}_3$ , 25  $^\circ\text{C}$ ):  $\delta$  = 212.2 (=C=), 165.0 (CO), 157.1 (Ar, C), 132.3 (Ar, 2CH), 116.8 (Ar, 2CH), 113.2 (Ar, C), 92.3 (=CH), 90.4 (=CH), 64.4 ( $\text{OCH}_2$ ), 61.2 ( $\text{OCH}_2$ ), 14.2 ( $\text{CH}_3$ ); IR ( $\text{CHCl}_3$ ,  $\text{cm}^{-1}$ ):  $\nu$  = 1969, 1721, 1510, 1234, 1173, 1026; HRMS (ES): calcd for  $\text{C}_{13}\text{H}_{17}\text{BrNO}_3$  [ $M + \text{NH}_4$ ] $^+$ : 314.03863; found: 314.03884.

**General procedure for the oxidative selenofunctionalization of allenes 1a–h. Synthesis of 2-(phenylselanyl)-but-2-enals 3a–h.**  $(\text{PhSe})_2$  (0.1 mmol) and  $[\text{PyF}]^+[\text{OTf}]^-$  (0.12 mmol) were successively added to a stirred solution of the appropriate allene **1** (0.1 mmol) in MeCN/THF (1:1, v/v, 2 mL). The reaction was stirred at room temperature until disappearance of the starting material (TLC). The mixture was extracted with ethyl acetate (3 x 10 mL). The organic extract was washed with brine, dried ( $\text{MgSO}_4$ ) and concentrated under reduced pressure. Chromatography of the residue using ethyl acetate/hexanes mixtures gave analytically pure compounds **3**. Spectroscopic and analytical data for compounds **3** follows.

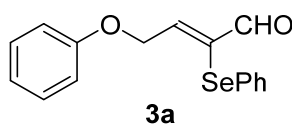

**$\alpha$ -Phenylseleno- $\alpha,\beta$ -unsaturated aldehyde 3a.** From 100 mg (0.68 mmol) of allene **1a**, and after chromatography of the residue using hexanes/ethyl acetate (20:1) as eluent gave compound **3a** (158 mg, 73%; containing *ca.* 3% of its *E* diastereomer) as a colorless oil;  $^1\text{H}$  NMR (300 MHz,  $\text{CDCl}_3$ , 25  $^\circ\text{C}$ ):  $\delta$  = 9.85 (s, 1H), 7.41 (m, 2H), 7.32 (t, 1H,  $J$  = 5.1 Hz), 7.20 (m, 5H), 6.91 (tt, 1H,  $J$  = 7.4, 1.0 Hz), 6.75 (dd, 2H,  $J$  = 7.7, 1.0 Hz), 4.77 (d, 2H,  $J$  = 5.1 Hz);  $^{13}\text{C}$  NMR (75 MHz,  $\text{CDCl}_3$ , 25  $^\circ\text{C}$ ):  $\delta$  = 189.7, 157.8, 154.7, 136.1, 132.9 (2C), 129.7 (2C), 129.5 (2C), 128.0, 127.9, 121.6, 114.5 (2C), 67.1;  $^{77}\text{Se}$ -NMR (95 MHz,  $\text{CDCl}_3$ , 25  $^\circ\text{C}$ )  $\delta$ : 290.1 (s, 1Se, Se); IR ( $\text{CHCl}_3$ ,  $\text{cm}^{-1}$ ):  $\nu$  = 3059, 2916, 2849, 1698  $\text{cm}^{-1}$ ; HRMS (ES): calcd for  $\text{C}_{16}\text{H}_{18}\text{NO}_2\text{Se}$  [ $M + \text{NH}_4$ ] $^+$ : 336.04979; found: 336.05109.

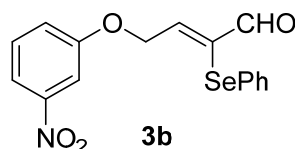

**$\alpha$ -Phenylseleno- $\alpha,\beta$ -unsaturated aldehyde 3b.** From 127 mg (0.66 mmol) of allene **1b**, and after chromatography of the residue using hexanes/ethyl acetate (10:1) as eluent gave compound **3b** (102 mg, 42%; containing *ca.* 5% of its *E* diastereomer) as a colorless oil;  $^1\text{H}$  NMR (300 MHz,  $\text{CDCl}_3$ , 25 °C):  $\delta$  = 9.34 (s, 1H, CHO), 7.76 (ddd, 1H,  $J$  = 8.1, 2.1, 0.9 Hz, ArH), 7.48 (t, 1H,  $J$  = 2.3 Hz, ArH), 7.45–7.40 (m, 2H, ArH), 7.33 (t, 1H,  $J$  = 8.2 Hz, =CH), 7.27–7.19 (m, 4H, ArH), 7.06 (ddd, 1H,  $J$  = 8.3, 2.6, 0.9 Hz, ArH), 4.71 (d, 2H,  $J$  = 5.1 Hz,  $\text{CH}_2$ );  $^{13}\text{C}$  NMR (75 MHz,  $\text{CDCl}_3$ , 25 °C):  $\delta$  = 189.7 (CHO), 158.4, 151.3 (=CH), 137.3, 133.5 (Ar, 2CH), 131.7, 130.4 (Ar, CH), 129.8 (Ar, 2CH), 129.3 (Ar, CH), 128.5, 121.8 (Ar, CH), 116.7 (Ar, CH), 108.9 (Ar, CH), 67.7 ( $\text{CH}_2$ );  $^{77}\text{Se}$ -NMR (95 MHz,  $\text{CDCl}_3$ , 25 °C)  $\delta$ : 302.3 (s, 1Se, Se); IR ( $\text{CHCl}_3$ ,  $\text{cm}^{-1}$ ):  $\nu$  = 2926, 1697, 1529, 1351  $\text{cm}^{-1}$ ; HRMS (ES): calcd for  $\text{C}_{16}\text{H}_{17}\text{N}_2\text{O}_4\text{Se}$  [ $M + \text{NH}_4$ ] $^+$ : 381.03488; found: 381.03497.

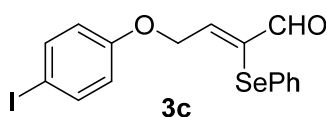

**$\alpha$ -Phenylseleno- $\alpha,\beta$ -unsaturated aldehyde 3c.** From 120 mg (0.44 mmol) of allene **1c**, and after chromatography of the residue using hexanes/ethyl acetate (10:1) as eluent gave compound **3c** (91 mg, 47%; containing *ca.* 5% of its *E* diastereomer) as a colorless oil;  $^1\text{H}$  NMR (300 MHz,  $\text{CDCl}_3$ , 25 °C):  $\delta$  = 9.42 (s, 1H, CHO), 7.58–7.51 (m, 2H, ArH), 7.50–7.43 (m, 2H, ArH), 7.33 (dd, 1H,  $J$  = 8.5, 3.4 Hz, =CH), 7.31–7.26 (m, 3H, ArH), 6.62–6.55 (m, 2H, ArH), 4.78 (d, 2H,  $J$  = 5.1 Hz,  $\text{CH}_2$ );  $^{13}\text{C}$  NMR (75 MHz,  $\text{CDCl}_3$ , 25 °C):  $\delta$  = 189.7 (CHO), 157.8, 153.5 (=CH), 138.6 (Ar, 2CH), 136.6, 133.1 (Ar, 2CH), 129.7 (Ar, 2CH), 128.3 (Ar, CH), 128.2, 117.0 (Ar, 2CH), 83.9, 67.3 ( $\text{CH}_2$ );  $^{77}\text{Se}$ -NMR (95 MHz,  $\text{CDCl}_3$ , 25 °C)  $\delta$ : 292.9 (s, 1Se, Se); IR ( $\text{CHCl}_3$ ,  $\text{cm}^{-1}$ ):  $\nu$  = 3061, 2923, 2847, 1694, 1480, 1234  $\text{cm}^{-1}$ .



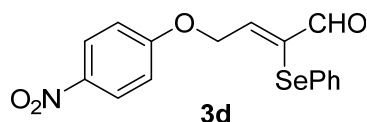

**$\alpha$ -Phenylseleno- $\alpha,\beta$ -unsaturated aldehyde 3d.** From 233 mg (1.22 mmol) of allene **1d**, and after chromatography of the residue using hexanes/ethyl acetate (15:1) as eluent gave compound **3d** (154 mg, 32%; containing *ca.* 8% of its *E* diastereomer) as a colorless oil;  $^1\text{H}$  NMR (300 MHz,  $\text{CDCl}_3$ , 25 °C):  $\delta$  = 9.37 (s, 1H, CHO), 8.15–8.06 (m, 2H, ArH), 7.58–7.49 (m, 2H, ArH), 7.46–7.39 (m, 1H, ArH), 7.27–7.22 (m, 2H, ArH), 7.18 (dd, 2H,  $J$  = 4.8, 2.3 Hz, ArH), 6.83–6.74 (m, 1H, =CH), 4.81 (d, 2H,  $J$  = 5.2 Hz,  $\text{CH}_2$ );  $^{13}\text{C}$  NMR (75 MHz,  $\text{CDCl}_3$ , 25 °C):  $\delta$  = 188.4 (CHO), 161.6, 150.1 (Ar, =CH), 132.0, 130.5 (Ar, 2CH), 128.6, 128.2 (Ar, 2CH), 126.7, 125.0 (Ar, 2CH), 114.6 (Ar, CH), 113.5 (Ar, 2CH), 66.6 ( $\text{CH}_2$ );  $^{77}\text{Se}$ -NMR (95 MHz,  $\text{CDCl}_3$ , 25 °C)  $\delta$ : 294.6 (s, 1Se, Se); IR ( $\text{CHCl}_3$ ,  $\text{cm}^{-1}$ ):  $\nu$  = 3061, 2924, 2853, 1697, 1513, 1338, 1257  $\text{cm}^{-1}$ .

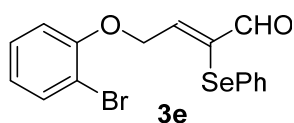

**$\alpha$ -Phenylseleno- $\alpha,\beta$ -unsaturated aldehyde 3e.** From 141 mg (0.626 mmol) of allene **1e**, and after chromatography of the residue using hexanes/ethyl acetate (10:1) as eluent gave compound **3e** (98 mg, 42%; containing *ca.* 6% of its *E* diastereomer) as a colorless oil;  $^1\text{H}$  NMR (300 MHz,  $\text{C}_6\text{D}_6$ , 25 °C):  $\delta$  = 8.80 (s, 1H, CHO), 7.41 (dd, 1H,  $J$  = 7.9, 1.6 Hz, ArH), 7.28–7.22 (m, 2H, ArH), 6.91–6.83 (m, 3H, ArH), 6.80 (dd, 1H,  $J$  = 7.9, 1.2 Hz, ArH), 6.69 (t, 1H,  $J$  = 5.1 Hz, =CH), 6.48 (d, 1H,  $J$  = 1.3 Hz, ArH), 6.28 (dd, 1H,  $J$  = 8.2, 1.3 Hz, ArH), 4.39 (d, 2H,  $J$  = 5.1 Hz,  $\text{CH}_2$ );  $^{13}\text{C}$  NMR (75 MHz,  $\text{C}_6\text{D}_6$ , 25 °C):  $\delta$  = 188.5 (CHO), 154.8, 152.9 (=CH), 136.5, 134.0 (Ar, CH), 133.2 (Ar, 2CH), 129.5 (Ar, 2CH), 128.9, 128.6 (Ar, CH), 127.9 (Ar, CH), 122.7 (Ar, CH), 113.3 (Ar, CH), 112.6, 68.1 ( $\text{CH}_2$ );  $^{77}\text{Se}$ -NMR (95 MHz,  $\text{C}_6\text{D}_6$ , 25 °C)  $\delta$ : 286.7 (s, 1Se, Se); IR ( $\text{C}_6\text{H}_6$ ,  $\text{cm}^{-1}$ ):  $\nu$  = 3036, 2921, 2850, 2717, 1695, 1475, 737  $\text{cm}^{-1}$ .

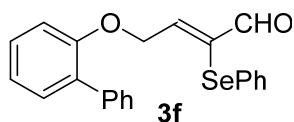

**$\alpha$ -Phenylseleno- $\alpha,\beta$ -unsaturated aldehyde **3f**.** From 110 mg (0.494 mmol) of allene **1f**, and after chromatography of the residue using hexanes/ethyl acetate (10:1) as eluent gave compound **3f** (69 mg, 37%; containing *ca.* 4% of its *E* diastereomer) as a colorless oil;  $^1\text{H}$  NMR (300 MHz,  $\text{C}_6\text{D}_6$ , 25  $^\circ\text{C}$ ):  $\delta$  = 8.71 (s, 1H, CHO), 7.56 (dt, 2H,  $J$  = 2.9, 1.7 Hz, ArH), 7.33–7.20 (m, 5H, ArH), 7.06 (td, 1H,  $J$  = 7.4, 1.7 Hz, =CH), 6.88 (ddd, 5H,  $J$  = 7.4, 5.0, 2.6 Hz, ArH), 6.63–6.54 (m, 2H, ArH), 4.46 (d, 2H,  $J$  = 5.1 Hz,  $\text{CH}_2$ );  $^{13}\text{C}$  NMR (75 MHz,  $\text{C}_6\text{D}_6$ , 25  $^\circ\text{C}$ ):  $\delta$  = 188.6 (CHO), 155.4, 153.7 (=CH), 139.0, 136.2, 133.3 (Ar, 2CH), 132.0, 131.6 (Ar, CH), 130.0 (Ar, 2CH), 129.5 (Ar, 2CH), 129.1, 128.9 (Ar, CH), 128.4 (Ar, 2CH), 127.7 (Ar, CH), 127.4 (Ar, CH), 122.2 (Ar, CH), 113.2 (Ar, CH), 68.0 ( $\text{CH}_2$ );  $^{77}\text{Se}$ -NMR (95 MHz,  $\text{C}_6\text{D}_6$ , 25  $^\circ\text{C}$ )  $\delta$ : 285.2 (s, 1Se, Se); IR ( $\text{C}_6\text{H}_6$ ,  $\text{cm}^{-1}$ ):  $\nu$  = 3058, 2924, 2849, 2716 1696, 1478  $\text{cm}^{-1}$ ; HRMS (ES): calcd for  $\text{C}_{22}\text{H}_{18}\text{NaO}_2\text{Se}$  [ $M + \text{Na}$ ] $^+$ : 417.03654; found: 417.03610.

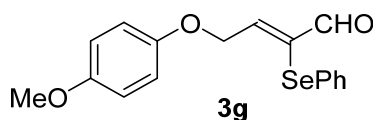

**$\alpha$ -Phenylseleno- $\alpha,\beta$ -unsaturated aldehyde **3g**.** From 100 mg (0.57 mmol) of allene **1g**, and after chromatography of the residue using hexanes/ethyl acetate (10:1) as eluent gave compound **3g** (151 mg, 77%; containing *ca.* 2% of its *E* diastereomer) as a colorless oil;  $^1\text{H}$  NMR (300 MHz,  $\text{CDCl}_3$ , 25  $^\circ\text{C}$ ):  $\delta$  = 9.30 (s, 1H), 7.39 (m, 2H), 7.31 (t, 1H,  $J$  = 5.1 Hz), 7.20 (m, 3H), 6.72 (m, 4H), 4.73 (d, 2H,  $J$  = 5.1 Hz), 3.70 (s, 3H);  $^{13}\text{C}$  NMR (75 MHz,  $\text{CDCl}_3$ , 25  $^\circ\text{C}$ ):  $\delta$  = 189.7, 155.0, 154.4, 151.9, 136.0, 132.9 (2C), 129.5 (2C), 128.4, 127.9, 115.6 (2C), 114.8 (2C), 67.9, 55.7;  $^{77}\text{Se}$ -NMR (95 MHz,  $\text{CDCl}_3$ , 25  $^\circ\text{C}$ )  $\delta$ : 286.6 (s, 1Se, Se); IR ( $\text{CHCl}_3$ ,  $\text{cm}^{-1}$ ):  $\nu$  = 3060, 2926, 2833, 1697  $\text{cm}^{-1}$ ; HRMS (ES): calcd for  $\text{C}_{17}\text{H}_{16}\text{NaO}_3\text{Se}$  [ $M + \text{Na}$ ] $^+$ : 371.01577; found: 371.01756.

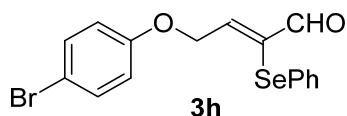

**$\alpha$ -Phenylseleno- $\alpha,\beta$ -unsaturated aldehyde **3h**.** From 130 mg (0.58 mmol) of allene **1h**, and after chromatography of the residue using hexanes/ethyl acetate (20:1) as eluent gave compound **3h** (206 mg, 89%; containing *ca.* 2% of its *E* diastereomer) as a colorless oil;  $^1\text{H}$  NMR (300 MHz,  $\text{CDCl}_3$ , 25  $^\circ\text{C}$ ):  $\delta$  = 9.34 (s, 1H), 7.40 (m, 2H), 7.25 (m, 6H), 6.62 (d, 2H,  $J$  = 9.1 Hz), 4.71 (d, 2H,  $J$  = 5.1 Hz);  $^{13}\text{C}$  NMR (75 MHz,  $\text{CDCl}_3$ , 25  $^\circ\text{C}$ ):  $\delta$  = 189.6, 156.9, 153.4, 136.4, 133.0 (2C), 132.5 (2C), 129.6 (2C), 128.2, 128.0, 116.4 (2C), 113.8, 67.4;  $^{77}\text{Se}$ -NMR (95 MHz,  $\text{CDCl}_3$ , 25  $^\circ\text{C}$ )  $\delta$ : 292.6 (s, 1Se, Se); IR ( $\text{CHCl}_3$ ,  $\text{cm}^{-1}$ ):  $\nu$  = 3062, 2920, 2836, 1700  $\text{cm}^{-1}$ ; HRMS (ES): calcd for  $\text{C}_{16}\text{H}_{13}\text{BrNaO}_2\text{Se}$  [ $M + \text{Na}$ ] $^+$ : 418.91539; found: 418.91558.

**General procedure for the chloroselenofunctionalization of allenes **1b,c**. Synthesis of chloro-phenylselanes **4b,c**.** PhSeCl (0.60 mmol) was added to a stirred solution of the appropriate allene **1** (0.40 mmol) in MeCN/water (20:1, v/v, 1.7 mL). After disappearance of the starting material (TLC) the mixture was extracted with ethyl acetate (3 x 20 mL). The organic extract was washed with brine, dried ( $\text{MgSO}_4$ ) and concentrated under reduced pressure. Chromatography of the residue using ethyl acetate/hexanes mixtures gave analytically pure compounds **4**. Spectroscopic and analytical data for compounds **4** follows.

**Reaction of allene **1b**.** From 108 mg (0.397 mmol) of allene **1b**, and after chromatography of the residue using hexanes/ethyl acetate (10:1) as eluent, 84 mg (31%) of less polar compound (*Z*)-**4b** and 71 mg (26%) of more polar compound (*E*)-**4b** were obtained.

**Chloro-phenylselane (*Z*)-**4b**.** Colorless oil;  $^1\text{H}$  NMR (300 MHz,  $\text{CDCl}_3$ , 25  $^\circ\text{C}$ ):  $\delta$  = 7.76 (ddd, 1H,  $J$  = 8.1, 2.1, 0.9 Hz, ArH), 7.65 (t, 1H,  $J$  = 2.3 Hz, ArH), 7.46 (ddd, 2H,  $J$  = 3.7, 2.9, 1.8 Hz, ArH), 7.35 (t, 1H,  $J$  = 8.2 Hz, ArH), 7.25 (dd, 3H,  $J$  = 4.1, 2.4 Hz, ArH), 7.20–7.14 (m, 1H, ArH), 6.47 (tt, 1H,  $J$  = 5.8, 1.2 Hz, =CH), 4.79 (dt, 2H,  $J$  = 5.8, 1.0 Hz,  $\text{OCH}_2$ ), 4.08 (d, 2H,  $J$  = 1.2 Hz,  $\text{CH}_2\text{-Cl}$ );  $^{13}\text{C}$  NMR (75 MHz,  $\text{CDCl}_3$ , 25  $^\circ\text{C}$ ):  $\delta$  = 158.8, 149.3, 133.6 (Ar, 2CH), 133.2, 131.9 (=CH),

130.2 (Ar, CH), 129.8 (Ar, 2CH), 128.4 (Ar, CH), 127.6, 121.9 (Ar, CH), 116.2 (Ar, CH), 109.2 (Ar, CH), 67.5(CH<sub>2</sub>), 48.4 (CH<sub>2</sub>); <sup>77</sup>Se-NMR (95 MHz, CDCl<sub>3</sub>, 25 °C) δ: 347.4 (s, 1Se, Se); IR (CHCl<sub>3</sub>, cm<sup>-1</sup>): ν = 3074, 2938, 1523, 1477, 1441, 1345 cm<sup>-1</sup>; HRMS (ES): calcd for C<sub>16</sub>H<sub>18</sub>ClN<sub>2</sub>O<sub>3</sub>Se [M+ NH<sub>4</sub>]<sup>+</sup>: 401.01638; found: 401.01738.

**Chloro-phenylselane (E)-4b.** Colorless oil; <sup>1</sup>H NMR (300 MHz, CDCl<sub>3</sub>, 25 °C): δ = 7.78 (ddd, 1H, *J* = 8.1, 2.1, 0.9 Hz, ArH), 7.64 (t, 1H, *J* = 2.3 Hz, ArH), 7.54–7.48 (m, 2H, ArH), 7.37 (t, 1H, *J* = 8.2 Hz, ArH), 7.30–7.23 (m, 3H, ArH), 7.15 (ddd, 1H, *J* = 8.3, 2.5, 0.8 Hz, ArH), 6.06 (t, 1H, *J* = 6.3 Hz, =CH), 4.66 (d, 2H, *J* = 6.3 Hz, OCH<sub>2</sub>), 4.18 (s, 2H, CH<sub>2</sub>-Cl); <sup>13</sup>C NMR (75 MHz, CDCl<sub>3</sub>, 25 °C): δ = 158.7, 149.3, 135.1 (Ar, 2CH), 134.8, 131.5 (=CH), 130.2 (Ar, CH), 129.8 (Ar, 2CH), 128.8 (Ar, CH), 127.8, 121.99 (Ar, CH), 116.4 (Ar, CH), 109.2 (Ar, CH), 65.17 (CH<sub>2</sub>), 42.67 (CH<sub>2</sub>); <sup>77</sup>Se-NMR (95 MHz, CDCl<sub>3</sub>, 25 °C) δ: 447.0 (s, 1Se, Se); IR (CHCl<sub>3</sub>, cm<sup>-1</sup>): ν = 1618, 1578, 1528, 1350, 1244, 737 cm<sup>-1</sup>.

**Reaction of allene 1c.** From 108 mg (0.395 mmol) of allene **1c**, and after chromatography of the residue using hexanes/ethyl acetate (15:1) as eluent, 87 mg (47%) of less polar compound (*Z*)-**4c** and 76 mg (41%) of more polar compound (*E*)-**4c** were obtained.

**Chloro-phenylselane (Z)-4c.** Colorless oil; <sup>1</sup>H NMR (300 MHz, CDCl<sub>3</sub>, 25 °C): δ = 7.51–7.44 (m, 2H, ArH), 7.44–7.39 (m, 2H, ArH), 7.28–7.21 (m, 3H, ArH), 6.65–6.59 (m, 2H, ArH), 6.46 (tt, 1H, *J* = 5.7, 1.2 Hz, =CH), 4.69 (d, 2H, *J* = 5.8 Hz, OCH<sub>2</sub>), 4.07 (d, 2H, *J* = 1.1 Hz, CH<sub>2</sub>-Cl); <sup>13</sup>C NMR (75 MHz, CDCl<sub>3</sub>, 25 °C): δ = 158.2, 138.4 (Ar, 2CH), 133.4 (Ar, 2CH), 133.3 (=CH), 132.3, 129.8 (Ar, 2CH), 128.3 (Ar, CH), 127.9, 117.3 (Ar, 2CH), 83.4, 67.4 (CH<sub>2</sub>), 48.5 (CH<sub>2</sub>); <sup>77</sup>Se-NMR (95 MHz, CDCl<sub>3</sub>, 25 °C) δ: 343.7 (s, 1Se, Se); IR (CHCl<sub>3</sub>, cm<sup>-1</sup>): ν = 3058, 2923, 2851, 1873, 1582, 1482 cm<sup>-1</sup>.

**Chloro-phenylselane (E)-4c.** Colorless oil; <sup>1</sup>H NMR (300 MHz, CDCl<sub>3</sub>, 25 °C): δ = 7.52–7.47 (m, 4H, ArH), 7.29–7.21 (m, 3H, ArH), 6.63–6.57 (m, 2H, ArH), 6.08 (t, 1H, *J* = 6.3 Hz, =CH), 4.55 (d, 2H, *J* = 6.3 Hz, OCH<sub>2</sub>), 4.18–4.13 (m, 2H, CH<sub>2</sub>-Cl); <sup>13</sup>C NMR (75 MHz, CDCl<sub>3</sub>, 25 °C): δ =

158.1, 138.5 (Ar, 2CH), 134.9 (Ar, 2CH), 133.8, 132.9 (=CH), 129.7 (Ar, 2CH), 128.6 (Ar, CH), 128.0, 117.3 (Ar, 2CH), 83.6, 64.8 (CH<sub>2</sub>), 42.8 (CH<sub>2</sub>); <sup>77</sup>Se-NMR (95 MHz, CDCl<sub>3</sub>, 25 °C) δ: 444.9 (s, 1Se, Se); IR (CHCl<sub>3</sub>, cm<sup>-1</sup>): ν = 3059, 2924, 2852, 1575, 1483, 1236 cm<sup>-1</sup>.

**General procedure for the oxidative selenofunctionalization of allenes 2a,c and 2e-h.**

**Synthesis of 4-oxo-3-(phenylselanyl)pent-2-enoates 7a,c and 7e-h.** (PhSe)<sub>2</sub> (0.1 mmol) and [PyF]<sup>+</sup>[OTf]<sup>-</sup> (0.12 mmol) were successively added to a stirred solution of the appropriate allene **2** (0.1 mmol) in MeCN/THF (1:1, v/v, 2 mL). The reaction was stirred at room temperature until disappearance of the starting material (TLC). The mixture was extracted with ethyl acetate (3 x 10 mL). The organic extract was washed with brine, dried (MgSO<sub>4</sub>) and concentrated under reduced pressure. Chromatography of the residue using ethyl acetate/hexanes mixtures gave analytically pure compounds **7**. Spectroscopic and analytical data for compounds **7** follows.

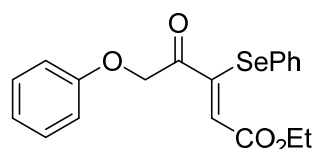

**7a**

**α-Selenoenone 7a.** From 35 mg (0.16 mmol) of allene **2a**, and after chromatography of the residue using hexanes/ethyl acetate (10:1) as eluent gave compound **7a** (39 mg, 63%; containing *ca.* 10% of its *E* diastereomer) as a colorless oil; <sup>1</sup>H NMR (300 MHz, C<sub>6</sub>D<sub>6</sub>, 25 °C): δ = 7.35 (dd, 2H, *J* = 6.0 Hz, *J* = 3.0 Hz, ArH), 7.06 (td, 2H, *J* = 6.0 Hz, *J* = 3.0 Hz, ArH), 6.85 (m, 7H, ArH), 5.85 (s, 1H, CH), 4.66 (s, 2H, OCH<sub>2</sub>), 3.74 (q, 2H, *J* = 6.0 Hz, OCH<sub>2</sub>-CH<sub>3</sub>), 0.76 (t, 3H, *J* = 6.0 Hz, CH<sub>3</sub>); <sup>13</sup>C NMR (75 MHz, C<sub>6</sub>D<sub>6</sub>, 25 °C): δ = 198.5 (CO), 163.4 (CO), 158.3 (Ar, C), 153.8 (Ar, C), 136.6 (Ar, 2CH), 129.6 (Ar, 2CH), 129.4 (Ar, 2CH), 128.0 (Ar, CH), 124.9 (C, Ar), 121.3 (Ar, CH), 118.9 (Ar, 2CH), 115.0 (Ar, CH), 71.7 (OCH<sub>2</sub>), 60.6 (OCH<sub>2</sub>), 13.5 (CH<sub>3</sub>); <sup>77</sup>Se-NMR (95 MHz, CDCl<sub>3</sub>, 25 °C) δ: 477.6 (s, 1Se, Se); IR (C<sub>6</sub>H<sub>6</sub>, cm<sup>-1</sup>): ν = 1700, 1580, 1482, 1311, 1192, 1025 cm<sup>-1</sup>; HRMS (ES): calcd for C<sub>19</sub>H<sub>19</sub>O<sub>4</sub>Se [*M* + H]<sup>+</sup>: 391.04441; found: 391.04555.

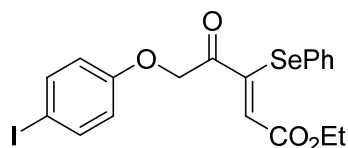**7c**

**$\alpha$ -Selenoenone 7c.** From 74 mg (0.21 mmol) of allene **2c**, and after chromatography of the residue using hexanes/ethyl acetate (8:1) as eluent gave compound **7c** (38 mg, 33%; containing *ca.* 25% of its *E* diastereomer) as a colorless oil;  $^1\text{H}$  NMR (300 MHz,  $\text{C}_6\text{D}_6$ , 25  $^\circ\text{C}$ ):  $\delta$  = 7.31 (m, 4H, ArH), 6.85 (m, 3H, ArH), 6.38 (dt, 2H,  $J$  = 9.0 Hz,  $J$  = 3.0 Hz, ArH), 5.82 (s, 1H, CH), 4.51 (s, 2H,  $\text{OCH}_2$ ), 3.74 (q, 2H,  $J$  = 6.0 Hz,  $\text{OCH}_2\text{-CH}_3$ ), 0.76 (t, 3H,  $J$  = 6.0 Hz,  $\text{CH}_3$ );  $^{13}\text{C}$  NMR (75 MHz,  $\text{C}_6\text{D}_6$ , 25  $^\circ\text{C}$ ):  $\delta$  = 197.7 (CO), 163.4 (CO), 158.0 (Ar, C), 153.5 (Ar, C), 138.2 (Ar, 2CH), 136.5 (Ar, 2CH), 129.6 (Ar, 3CH), 124.7 (C, Ar), 119.0 (Ar, CH), 117.3 (Ar, 2CH), 83.6 (Ar, C), 71.6 ( $\text{OCH}_2$ ), 60.6 ( $\text{OCH}_2$ ), 13.5 ( $\text{CH}_3$ );  $^{77}\text{Se}$ -NMR (95 MHz,  $\text{C}_6\text{D}_6$ , 25  $^\circ\text{C}$ )  $\delta$ : 478.9 (s, 1Se, Se); IR ( $\text{C}_6\text{H}_6$ ,  $\text{cm}^{-1}$ ):  $\nu$  = 1742, 1542, 1498, 1420, 1372, 1265, 1210, 1103  $\text{cm}^{-1}$ ; HRMS (ES): calcd for  $\text{C}_{19}\text{H}_{18}\text{IO}_4\text{Se}$  [ $M + \text{H}$ ] $^+$ : 516.94105; found: 516.94073.

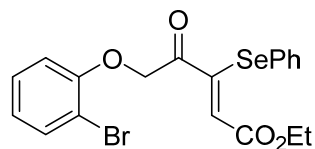**7e**

**$\alpha$ -Selenoenone 7e.** From 96 mg (0.32 mmol) of allene **2e**, and after chromatography of the residue using hexanes/ethyl acetate (8:1) as eluent gave compound **7e** (71 mg, 47%; containing *ca.* 20% of its *E* diastereomer) as a colorless oil;  $^1\text{H}$  NMR (300 MHz,  $\text{C}_6\text{D}_6$ , 25  $^\circ\text{C}$ ):  $\delta$  = 7.45 (dt, 2H,  $J$  = 9.0 Hz,  $J$  = 3.0 Hz, ArH), 7.36 (dt, 2H,  $J$  = 9.0 Hz,  $J$  = 3.0 Hz, ArH), 6.84 (m, 3H, ArH), 6.45 (td, 1H,  $J$  = 6.0 Hz,  $J$  = 3.0 Hz, ArH), 6.37 (dt, 1H,  $J$  = 9.0 Hz,  $J$  = 3.0 Hz, ArH), 5.92 (s, 1H, CH), 4.51 (s, 2H,  $\text{OCH}_2$ ), 3.77 (q, 2H,  $J$  = 6.0 Hz,  $\text{OCH}_2\text{-CH}_3$ ), 0.77 (t, 3H,  $J$  = 6.0 Hz,  $\text{CH}_3$ );  $^{13}\text{C}$  NMR (75 MHz,  $\text{C}_6\text{D}_6$ , 25  $^\circ\text{C}$ ):  $\delta$  = 198.4 (CO), 163.7 (CO), 154.5 (Ar, C), 153.4 (Ar, C), 136.7 (Ar, 2CH), 133.3 (Ar, CH), 129.6 (Ar, 2CH), 128.2 (Ar, CH), 128.0 (Ar, CH), 124.8 (Ar, C), 122.2 (Ar, CH), 119.2 (Ar, CH), 113.4 (Ar, CH), 112.0 (Ar, C), 72.2 ( $\text{OCH}_2$ ), 60.6 ( $\text{OCH}_2$ ), 13.6 ( $\text{CH}_3$ );  $^{77}\text{Se}$ -NMR (95 MHz,  $\text{C}_6\text{D}_6$ , 25  $^\circ\text{C}$ )  $\delta$ : 481.2 (s, 1Se, Se); IR ( $\text{C}_6\text{H}_6$ ,  $\text{cm}^{-1}$ ):  $\nu$  = 1743, 1541, 1496, 1420, 1372,

1261, 1215, 1105  $\text{cm}^{-1}$ ; HRMS (ES): calcd for  $\text{C}_{19}\text{H}_{18}\text{BrO}_4\text{Se}$  [ $M + \text{H}$ ] $^+$ : 468.95462; found: 468.95336.

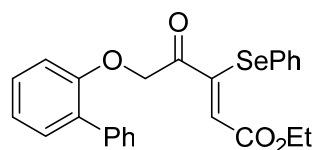

**7f**

**$\alpha$ -Selenoenone 7f.** From 349 mg (1.18 mmol) of allene **2f**, and after chromatography of the residue using hexanes/ethyl acetate (7:1) as eluent gave compound **7f** (190 mg, 38%; containing *ca.* 35% of its *E* diastereomer) as a colorless oil;  $^1\text{H}$  NMR (300 MHz,  $\text{C}_6\text{D}_6$ , 25  $^\circ\text{C}$ ):  $\delta$  = 7.58 (dt, 2H,  $J$  = 9.0 Hz,  $J$  = 3.0 Hz, ArH), 7.24 (m, 6H, ArH), 7.03 (td, 1H,  $J$  = 9.0 Hz,  $J$  = 3.0 Hz, ArH), 6.85 (m, 5H, ArH), 6.58 (d, 1H,  $J$  = 9.0 Hz, ArH), 5.67 (s, 1H, CH), 4.52 (s, 2H,  $\text{OCH}_2$ ), 3.72 (q, 2H,  $J$  = 6 Hz,  $\text{OCH}_2\text{-CH}_3$ ), 0.76 (t, 3H,  $J$  = 6.0 Hz,  $\text{CH}_3$ );  $^{13}\text{C}$  NMR (75 MHz,  $\text{C}_6\text{D}_6$ , 25  $^\circ\text{C}$ ):  $\delta$  = 198.7 (CO), 163.4 (CO), 154.9 (Ar, C), 153.6 (Ar, C), 138.7 (Ar, C), 136.6 (Ar, 2CH), 131.2 (Ar, C), 131.0 (Ar, CH), 129.8 (Ar, 2CH), 129.5 (Ar, 2CH), 128.0 (Ar, 2CH), 127.8 (Ar, 2CH), 126.8 (Ar, CH), 124.7 (Ar, C), 121.5 (Ar, CH), 118.7 (Ar, CH), 112.6 (Ar, CH), 72.3 ( $\text{OCH}_2$ ), 60.4 ( $\text{OCH}_2$ ), 13.6 ( $\text{CH}_3$ );  $^{77}\text{Se}$ -NMR (95 MHz,  $\text{C}_6\text{D}_6$ , 25  $^\circ\text{C}$ )  $\delta$ : 477.1 (s, 1Se, Se); IR ( $\text{C}_6\text{H}_6$ ,  $\text{cm}^{-1}$ ):  $\nu$  = 1709, 1593, 1503.69, 1319, 1197, 1031  $\text{cm}^{-1}$ ; HRMS (ES): calcd for  $\text{C}_{25}\text{H}_{23}\text{O}_4\text{Se}$  [ $M + \text{H}$ ] $^+$ : 467.07577; found: 467.07540.

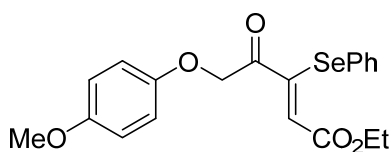

**7g**

**$\alpha$ -Selenoenone 7g.** From 47 mg (0.19 mmol) of allene **2g**, and after chromatography of the residue using hexanes/ethyl acetate (10:1) as eluent gave compound **7g** (42 mg, 53%; containing *ca.* 20% of its *E* diastereomer) as a colorless oil;  $^1\text{H}$  NMR (300 MHz,  $\text{C}_6\text{D}_6$ , 25  $^\circ\text{C}$ ):  $\delta$  = 7.37 (dt, 2H,  $J$  = 9.0 Hz,  $J$  = 3.0 Hz, ArH), 6.83 (m, 5H, ArH), 6.68 (dt, 2H,  $J$  = 9.0 Hz,  $J$  = 3.0 Hz, ArH), 5.86 (s, 1H, CH), 4.67 (s, 2H,  $\text{OCH}_2$ ), 3.76 (q, 2H,  $J$  = 6.0 Hz,  $\text{OCH}_2\text{-CH}_3$ ), 3.28 (s, 3H, OMe), 0.76 (t, 3H,  $J$  = 6.0 Hz,  $\text{CH}_3$ );  $^{13}\text{C}$  NMR (75 MHz,  $\text{C}_6\text{D}_6$ , 25  $^\circ\text{C}$ ):  $\delta$  = 198.9 (CO), 163.4 (CO), 154.6 (Ar, C), 154.0

(Ar, C), 152.5 (Ar, C), 136.6 (Ar, 2CH), 129.6 (Ar, 2CH), 128.0 (Ar, CH), 124.9 (Ar, C), 118.8 (Ar, CH), 116.0 (Ar, 2CH), 114.6 (Ar, 2CH), 72.6 (OCH<sub>2</sub>), 60.6 (OCH<sub>2</sub>), 54.8 (OCH<sub>3</sub>), 13.6 (CH<sub>3</sub>); <sup>77</sup>Se-NMR (95 MHz, C<sub>6</sub>D<sub>6</sub>, 25 °C) δ: 477.6 (s, 1Se, Se); IR (C<sub>6</sub>H<sub>6</sub>, cm<sup>-1</sup>): ν = 1703, 1591, 1504, 1317, 1192, 1027 cm<sup>-1</sup>; HRMS (ES): calcd for C<sub>20</sub>H<sub>21</sub>O<sub>5</sub>Se [*M*+ H]<sup>+</sup>: 421.05499; found: 421.05443.

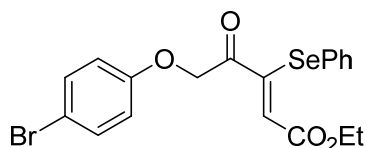

**7h**

**α-Selenoenone 7h.** From 59 mg (0.20 mmol) of allene **2h**, and after chromatography of the residue using hexanes/ethyl acetate (10:1) as eluent gave compound **7h** (39 mg, 43%; containing *ca.* 5% of its *E* diastereomer) as a colorless oil; <sup>1</sup>H NMR (300 MHz, C<sub>6</sub>D<sub>6</sub>, 25 °C): δ = 7.32 (dt, 2H, *J* = 9.0 Hz, *J* = 3.0 Hz, ArH), 7.12 (dt, 2H, *J* = 9.0 Hz, *J* = 3.0 Hz, ArH), 6.82 (m, 3H, ArH), 6.46 (dt, 2H, *J* = 9.0 Hz, *J* = 3.0 Hz, ArH), 5.82 (s, 1H, CH), 4.51 (s, 2H, OCH<sub>2</sub>), 3.73 (q, 2H, *J* = 6.0 Hz, OCH<sub>2</sub>-CH<sub>3</sub>), 0.76 (t, 3H, *J* = 6.0 Hz, CH<sub>3</sub>); <sup>13</sup>C NMR (75 MHz, C<sub>6</sub>D<sub>6</sub>, 25 °C): δ = 197.8 (CO), 163.4 (CO), 157.3 (Ar, C), 153.6 (Ar, C), 136.6 (Ar, 2CH), 132.2 (Ar, 2CH), 129.6 (Ar, 3CH), 124.7 (Ar, C), 116.7 (Ar, 2CH), 116.7 (Ar, CH), 113.6 (Ar, C), 71.7 (OCH<sub>2</sub>), 60.6 (OCH<sub>2</sub>), 13.5 (CH<sub>3</sub>); <sup>77</sup>Se-NMR (95 MHz, C<sub>6</sub>D<sub>6</sub>, 25 °C) δ: 478.9 (s, 1Se, Se); IR (C<sub>6</sub>H<sub>6</sub>, cm<sup>-1</sup>): ν = 1701, 1582, 1484, 1315, 1193, 1028 cm<sup>-1</sup>; HRMS (ES): calcd for C<sub>19</sub>H<sub>18</sub>BrO<sub>4</sub>Se [*M*+ H]<sup>+</sup>: 468.95462; found: 468.95396.

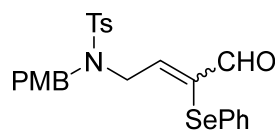

**14a**

***N*-(4-Methoxybenzyl)-4-methyl-*N*-(4-oxo-3-(phenylselanyl)but-2-en-1-yl)benzenesulfonamide 14a.** From 35 mg (0.11 mmol) of allene **10a**, and after chromatography of the residue using hexanes/ethyl acetate (10:1) as eluent gave compound **14a** (35 mg, 65%; containing *ca.* 10% of its *E* diastereomer) as a yellow oil; <sup>1</sup>H NMR (500 MHz, C<sub>6</sub>D<sub>6</sub>): δ = 8.78 (s, 1H, CHO), 7.64 (d, 2H, *J* = 7.6 Hz, ArH), 7.51 (m, 1H, ArH), 7.26 (m, 2H, ArH), 7.03 (d, 2H, *J* = 7.0 Hz, ArH), 6.88 (m, 2H, ArH), 6.79 (m, 3H, ArH), 6.65 (m, 2H, ArH), 4.02 (s, 2H, CH<sub>2</sub>), 3.99 (s, 1H, CHH), 3.98 (s, 1H,



CHH), 3.25 (s, 3H, OCH<sub>3</sub>), 1.91 (s, 3H, CH<sub>3</sub>); <sup>13</sup>C NMR (125 MHz, C<sub>6</sub>D<sub>6</sub>): δ = 188.6 (CHO), 160.2, 155.4 (Ar, CH), 143.3, 136.8, 135.6, 135.1, 132.6 (Ar, 2CH), 130.5 (Ar, 2CH), 129.9 (Ar, 2CH), 129.6, 129.4 (Ar, 2CH), 129.4 (Ar, CH), 127.8 (Ar, 2CH), 114.4 (Ar, 2CH), 54.8 (OCH<sub>3</sub>), 53.1 (CH<sub>2</sub>), 49.6 (CH<sub>2</sub>), 21.1 (CH<sub>3</sub>); <sup>77</sup>Se-NMR (95 MHz, C<sub>6</sub>D<sub>6</sub>) δ: 271.0 (s, 1Se, Se); IR (CHCl<sub>3</sub>, cm<sup>-1</sup>): ν = 2925, 2854, 1716, 1164, 742 cm<sup>-1</sup>; HRMS (ES): calcd for C<sub>25</sub>H<sub>29</sub>N<sub>2</sub>O<sub>4</sub>SSe [*M* + NH<sub>4</sub>]<sup>+</sup>: 533.1009; found: 533.1001.

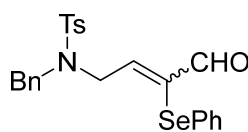**14b**

***N*-Benzyl-4-methyl-*N*-(4-oxo-3-(phenylselanyl)but-2-en-1-yl)benzenesulfonamide **14b**.** From 45 mg (0.14 mmol) of allene **10b**, and after chromatography of the residue using hexanes/ethyl acetate (11:1) as eluent gave compound **14b** (35 mg, 50%; as a single *Z* diastereomer) as a yellow oil; <sup>1</sup>H NMR (500 MHz, C<sub>6</sub>D<sub>6</sub>): δ = 8.75 (s, 1H, CHO), 7.62 (d, 2H, *J* = 7.6 Hz, ArH), 7.24 (m, 2H, ArH), 7.10 (m, 2H, ArH), 7.00 (m, 3H, ArH), 6.87 (m, 3H, ArH), 6.77 (d, 2H, *J* = 6.8 Hz, ArH), 6.59 (t, 1H, *J* = 6.6 Hz, ArH), 4.01 (s, 2H, CH<sub>2</sub>), 3.96 (s, 1H, CHH), 3.96 (s, 1H, CHH), 1.90 (s, 3H, CH<sub>3</sub>); <sup>13</sup>C NMR (125 MHz, C<sub>6</sub>D<sub>6</sub>): δ = 188.5 (CHO), 155.0 (Ar, CH), 143.3, 136.8, 136.1, 135.8, 132.6 (Ar, 2CH), 129.9 (Ar, 2CH), 129.6, 129.4 (Ar, 2CH), 129.0 (Ar, 2CH), 128.9 (Ar, 2CH), 128.3 (Ar, CH), 127.7 (Ar, 2CH), 127.4 (Ar, CH), 53.5 (CH<sub>2</sub>), 49.8 (CH<sub>2</sub>), 21.1 (CH<sub>3</sub>); <sup>77</sup>Se-NMR (95 MHz, C<sub>6</sub>D<sub>6</sub>) δ: 271.3 (s, 1Se, Se); IR (CHCl<sub>3</sub>, cm<sup>-1</sup>): ν = 2924, 2854, 1699, 1346, 1162, 740 cm<sup>-1</sup>; HRMS (ES): calcd for C<sub>24</sub>H<sub>27</sub>N<sub>2</sub>O<sub>3</sub>SSe [*M* + NH<sub>4</sub>]<sup>+</sup>: 503.0903; found: 503.0890.

**Reaction of allene **12**.** From 50 mg (0.25 mmol) of allene **12**, and after chromatography of the residue using hexanes/ethyl acetate (14:1) as eluent gave compound **15** (24 mg, 20%; containing *ca.* 9% of its *E* diastereomer) and compound **16** (14 mg, 25%; single *Z* diastereomer).

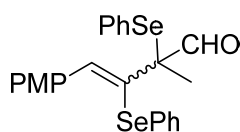**15**

**4-(4-Methoxyphenyl)-2-methyl-2,3-bis(phenylselanyl)but-3-enal 15.** Yellow oil (containing *ca.* 9% of its *E* diastereomer);  $^1\text{H}$  NMR (500 MHz,  $\text{C}_6\text{D}_6$ ):  $\delta = 9.82$  (s, 1H, CHO), 7.51 (m, 2H, ArH), 7.27 (s, 1H, CH), 7.25 (d, 2H,  $J = 7.3$  Hz, ArH), 7.08 (m, 2H, ArH), 6.93 (m, 3H, ArH), 6.83 (m, 3H, ArH), 6.77 (m, 2H, ArH), 3.26 (s, 3H,  $\text{OCH}_3$ ), 1.91 (s, 3H,  $\text{CH}_3$ );  $^{13}\text{C}$  NMR (125 MHz,  $\text{C}_6\text{D}_6$ ):  $\delta = 194.9$  (CHO), 159.8, 134.0 (Ar, 2CH), 133.7, 132.9, 132.0 (Ar, 2CH), 131.9, 131.0 (CH), 130.3, 130.2 (Ar, 2CH), 129.7 (Ar, 2CH), 129.5 (Ar, 2CH), 128.0 (Ar, CH), 127.4 (Ar, CH), 115.0 (Ar, 2CH), 62.6, 54.7 ( $\text{OCH}_3$ ), 18.0 ( $\text{CH}_3$ );  $^{77}\text{Se}$ -NMR (95 MHz,  $\text{C}_6\text{D}_6$ )  $\delta$ : 468.9 (s, 1Se, Se), 420.4 (s, 1Se, Se); IR ( $\text{CHCl}_3$ ,  $\text{cm}^{-1}$ ):  $\nu = 3019, 1510, 1255, 747$   $\text{cm}^{-1}$ ; HRMS (ES): calcd for  $\text{C}_{24}\text{H}_{22}\text{NaO}_2\text{Se}_2$  [ $M + \text{Na}$ ] $^+$ : 524.9847; found: 524.9850.

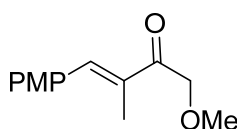

16

**(E)-1-Methoxy-4-(4-methoxyphenyl)-3-methylbut-3-en-2-one 16.** Yellow oil (single *Z* diastereomer);  $^1\text{H}$  NMR (500 MHz,  $\text{C}_6\text{D}_6$ ):  $\delta = 7.33$  (s, 1H, CH), 7.15 (m, 2H, ArH), 6.71 (m, 2H, ArH), 4.17 (s, 2H,  $\text{CH}_2$ ), 3.27 (s, 3H,  $\text{OCH}_3$ ), 3.23 (s, 3H,  $\text{OCH}_3$ ), 2.07 (d,  $J = 2.1$  Hz, 3H,  $\text{CH}_3$ );  $^{13}\text{C}$  NMR (125 MHz,  $\text{C}_6\text{D}_6$ ):  $\delta = 197.5, 160.4, 138.9$  (Ar, CH), 133.9, 131.9 (Ar, 2CH), 128.7, 114.2 (Ar, 2CH), 75.1 ( $\text{CH}_2$ ), 58.8 ( $\text{OCH}_3$ ), 54.8 ( $\text{OCH}_3$ ), 13.2 ( $\text{CH}_3$ ); IR ( $\text{CHCl}_3$ ,  $\text{cm}^{-1}$ ):  $\nu = 2925, 2853, 1679, 1605, 1259, 1182$ ; HRMS (ES): calcd for  $\text{C}_{13}\text{H}_{16}\text{NaO}_3$  [ $M + \text{Na}$ ] $^+$ : 243.0992; found: 243.0991.

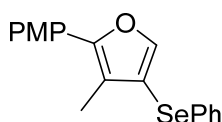

17

**2-(4-Methoxyphenyl)-3-methyl-4-(phenylselanyl)furan 17.** From 20 mg (0.11 mmol) of allenone **13**, and after chromatography of the residue using hexanes/ethyl acetate (9:1) as eluent gave compound **17** (23 mg, 63%) as a yellow oil;  $^1\text{H}$  NMR (300 MHz,  $\text{C}_6\text{D}_6$ ):  $\delta = 7.50$  (m, 2H, ArH),

7.27 (d, 2H,  $J = 7.3$  Hz, ArH), 7.16 (s, 1H, H<sub>Ar</sub>), 6.91 (m, 3H, ArH), 6.63 (d, 2H,  $J = 6.6$  Hz, ArH), 3.21 (s, 3H, OCH<sub>3</sub>), 1.61 (s, 3H, CH<sub>3</sub>); <sup>13</sup>C NMR (75 MHz, C<sub>6</sub>D<sub>6</sub>):  $\delta = 169.9, 160.8, 133.4$  (Ar, 2CH), 129.5 (Ar, 2CH), 129.0, 128.5, 128.3 (Ar, CH), 128.0, 127.9 (Ar, CH), 127.5 (Ar, 2CH), 119.3, 114.3 (Ar, 2CH), 54.8 (OCH<sub>3</sub>), 13.0 (CH<sub>3</sub>); <sup>77</sup>Se-NMR (95 MHz, C<sub>6</sub>D<sub>6</sub>)  $\delta$ : 262.2 (s, 1Se, Se); IR (CHCl<sub>3</sub>, cm<sup>-1</sup>):  $\nu = 3387, 2924, 2854, 1761, 1255$  cm<sup>-1</sup>; HRMS (ES): calcd for C<sub>18</sub>H<sub>17</sub>O<sub>2</sub>Se [ $M + H$ ]<sup>+</sup>: 343.0400; found: 343.0422.

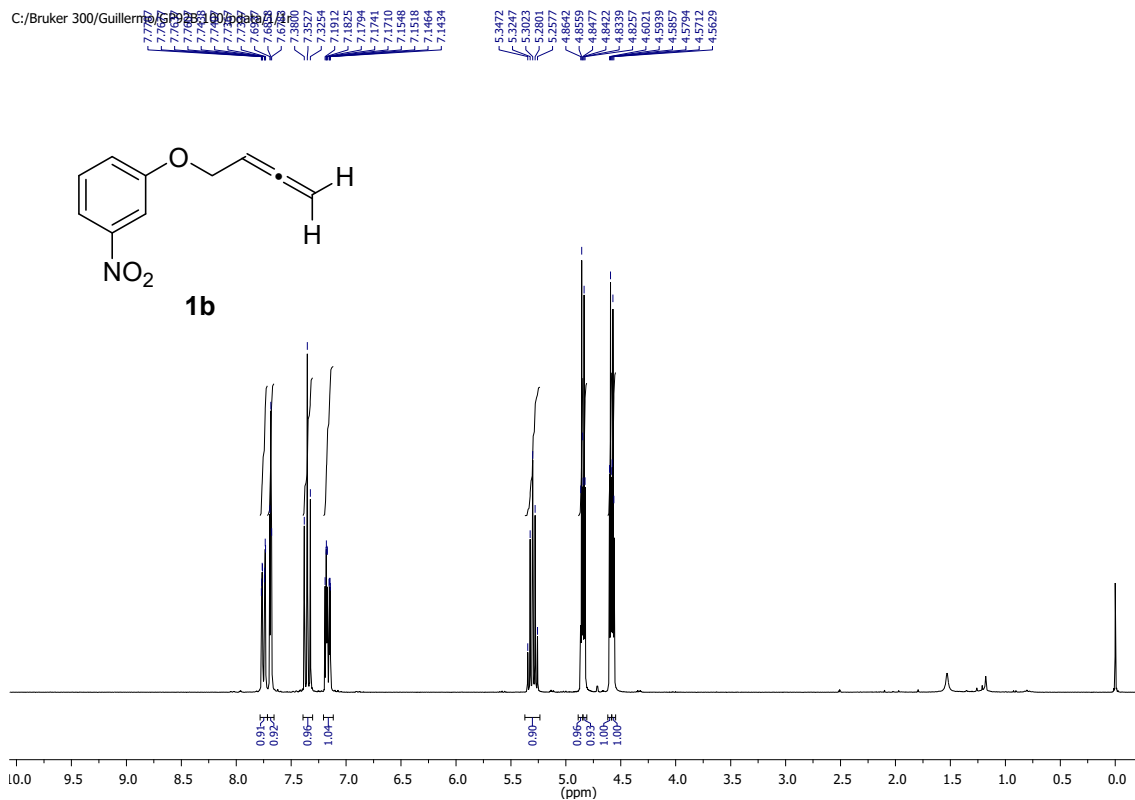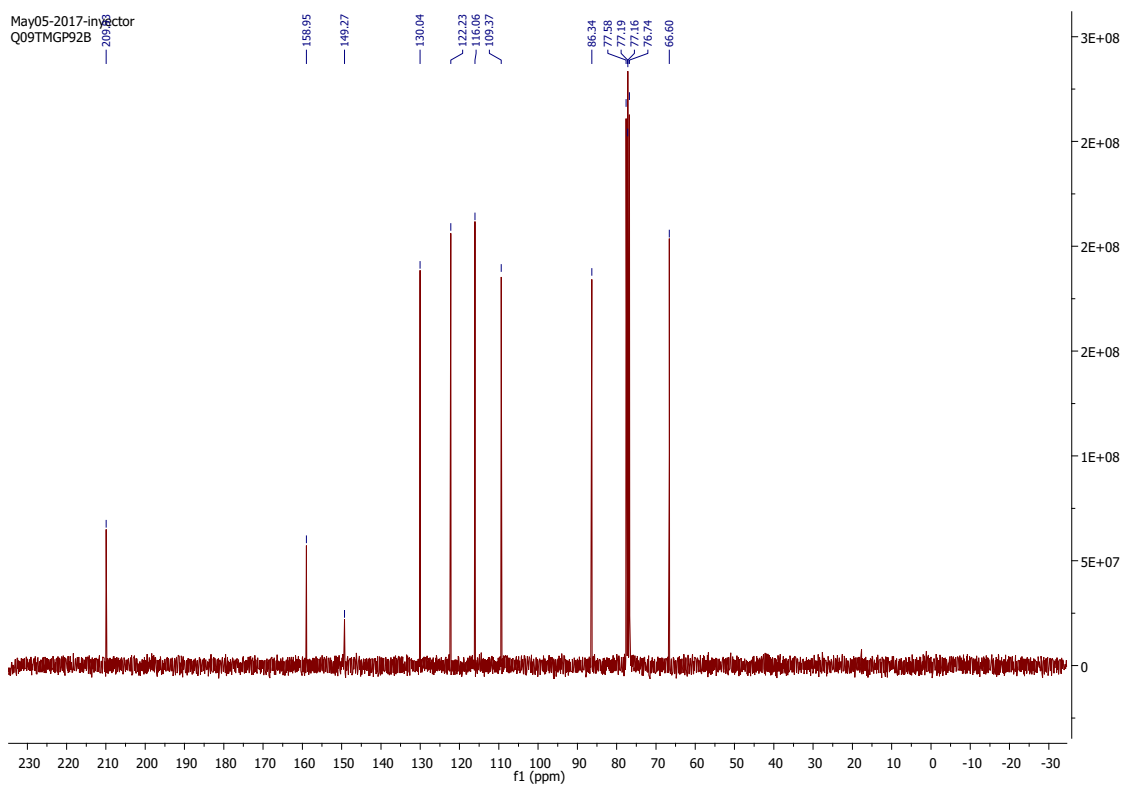

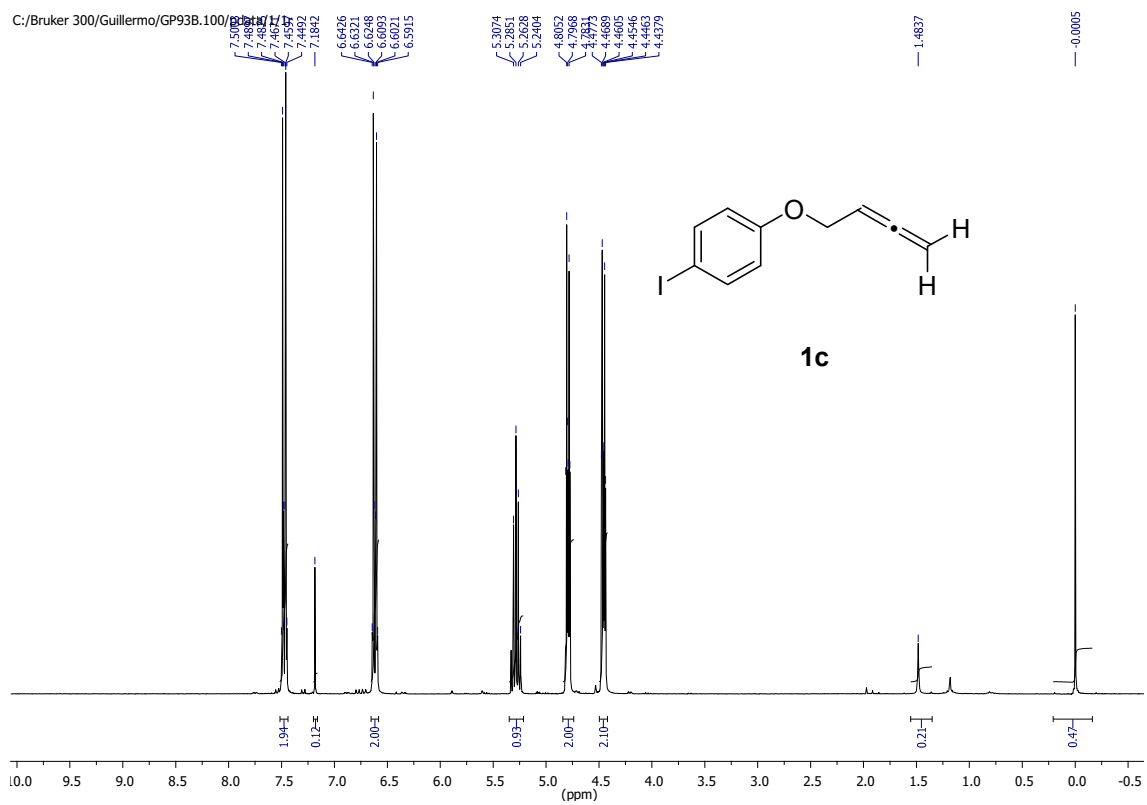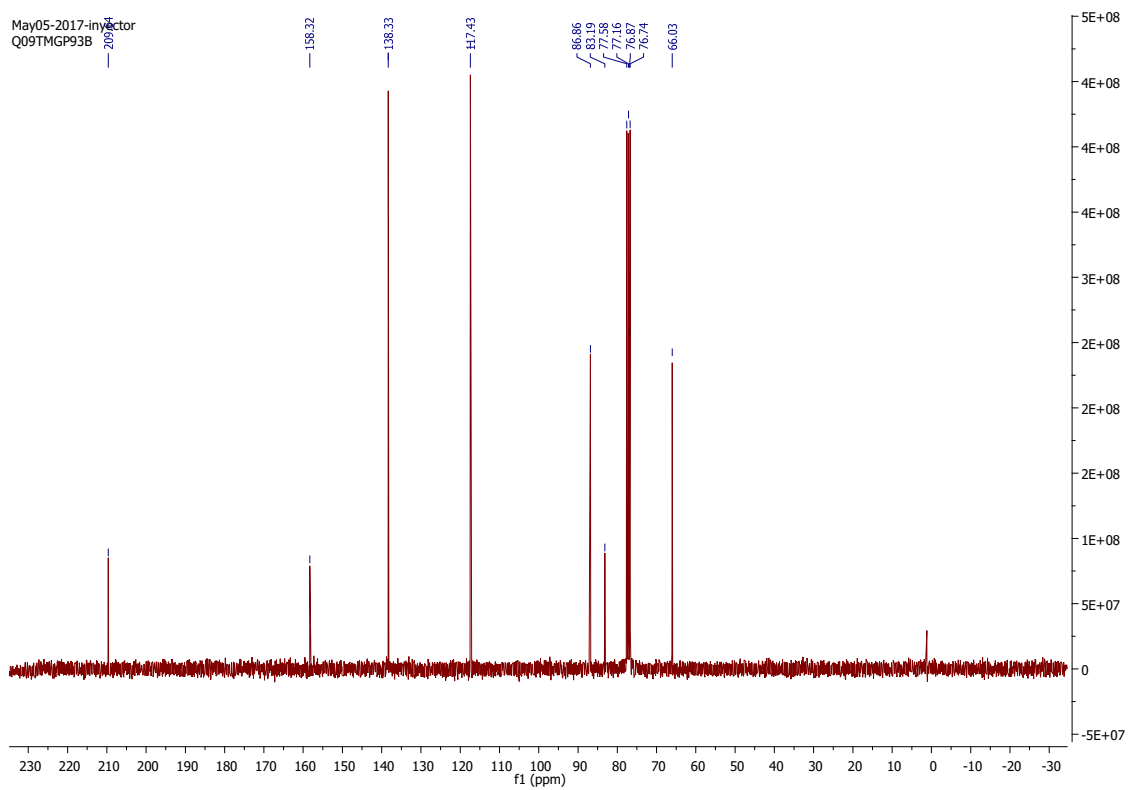

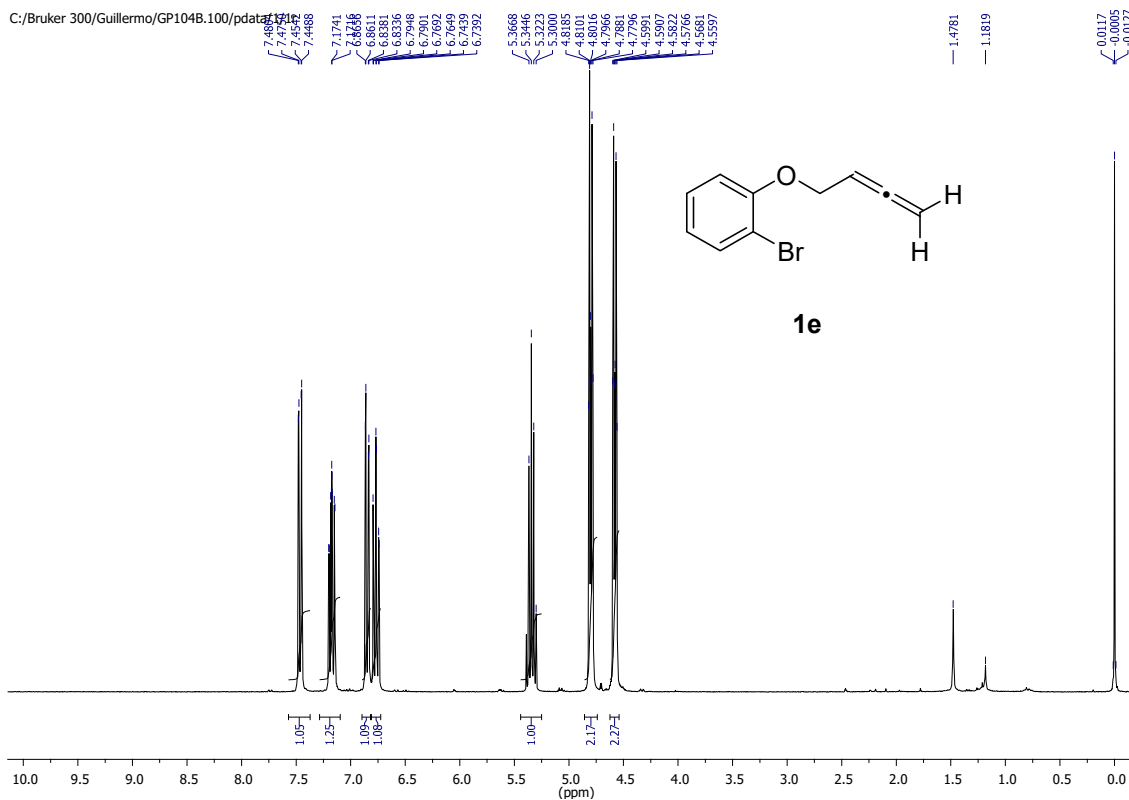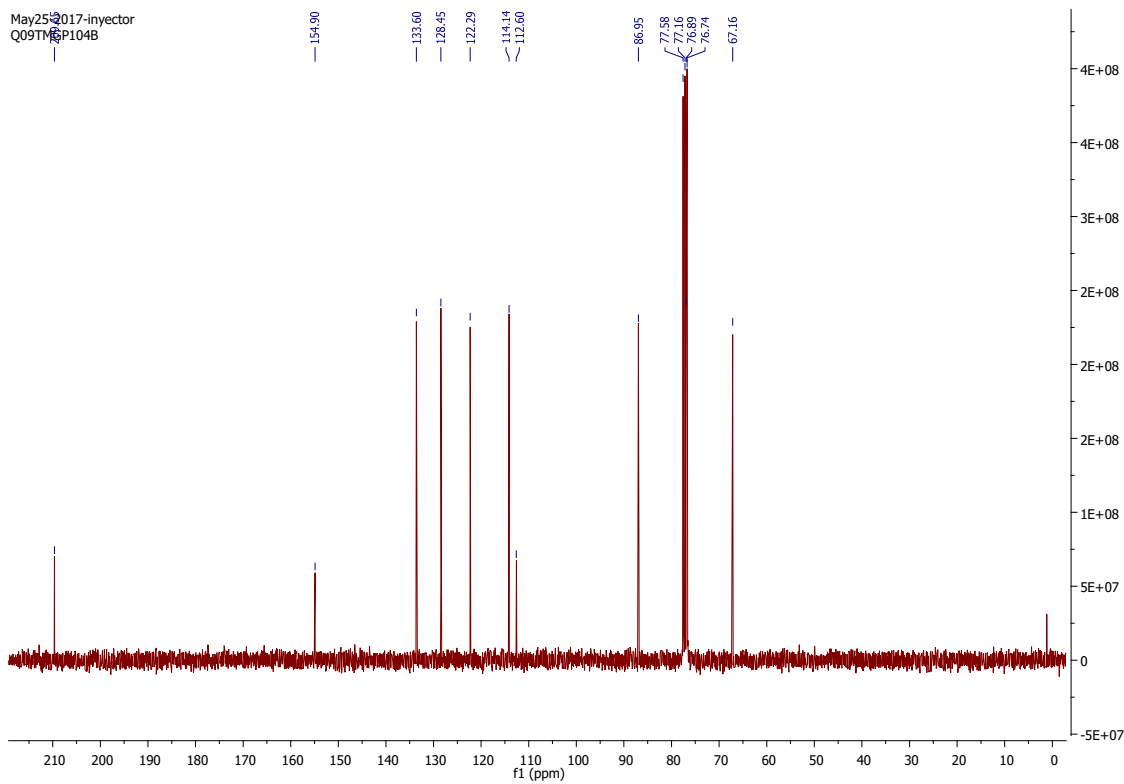

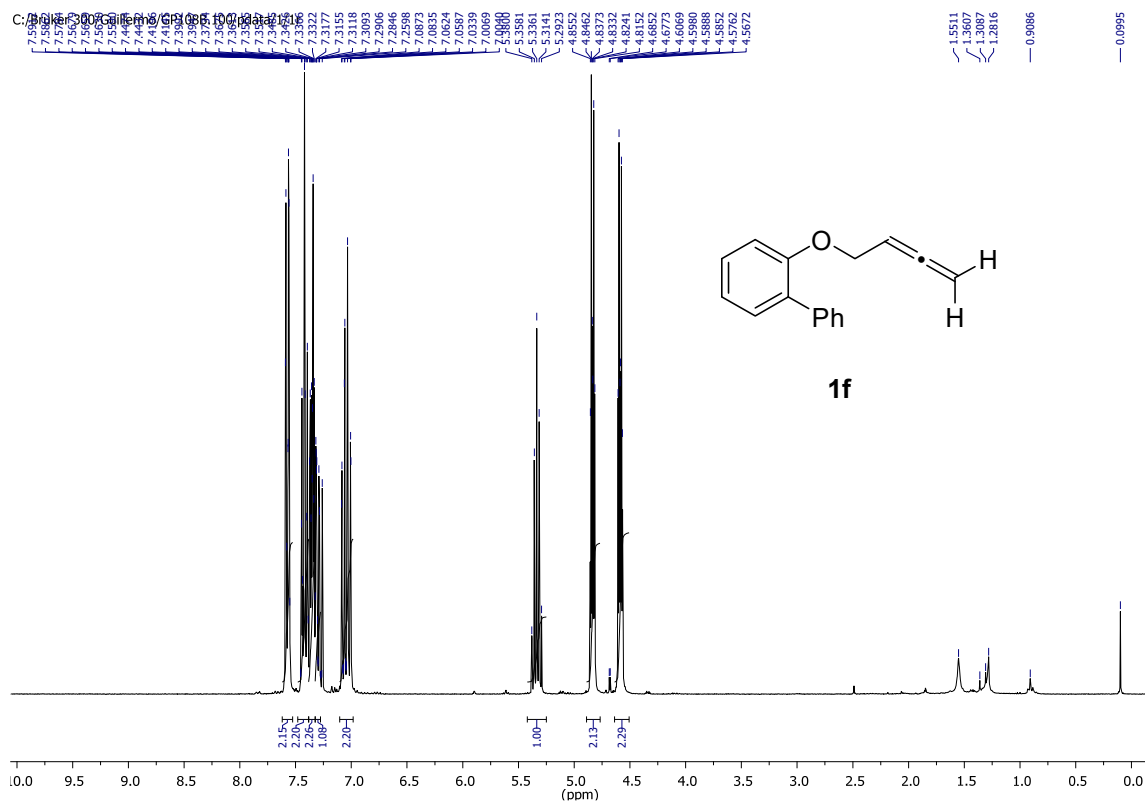

Jun01-2017-injector  
Q09TM6P108B

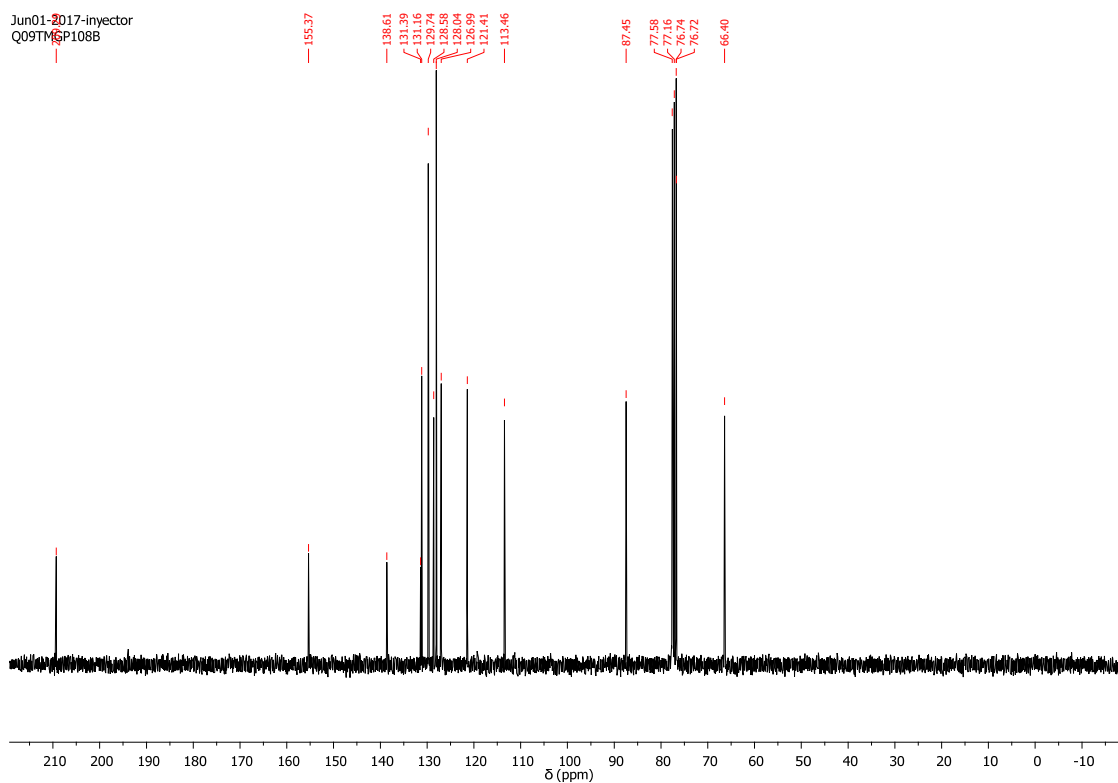

Q09TM440B

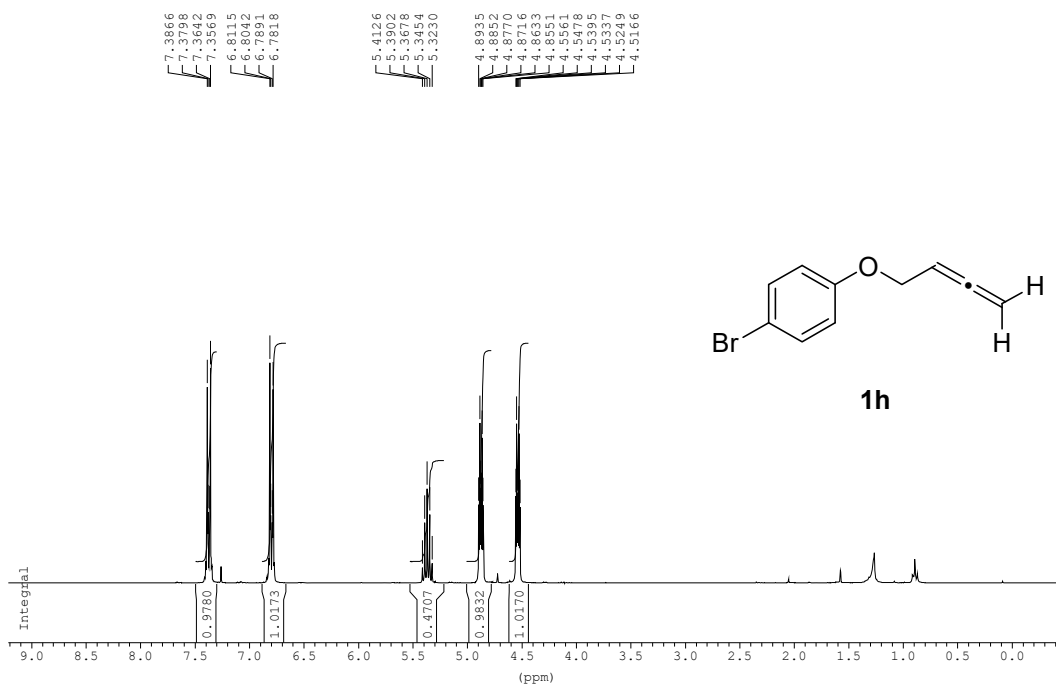

Q09TM440B

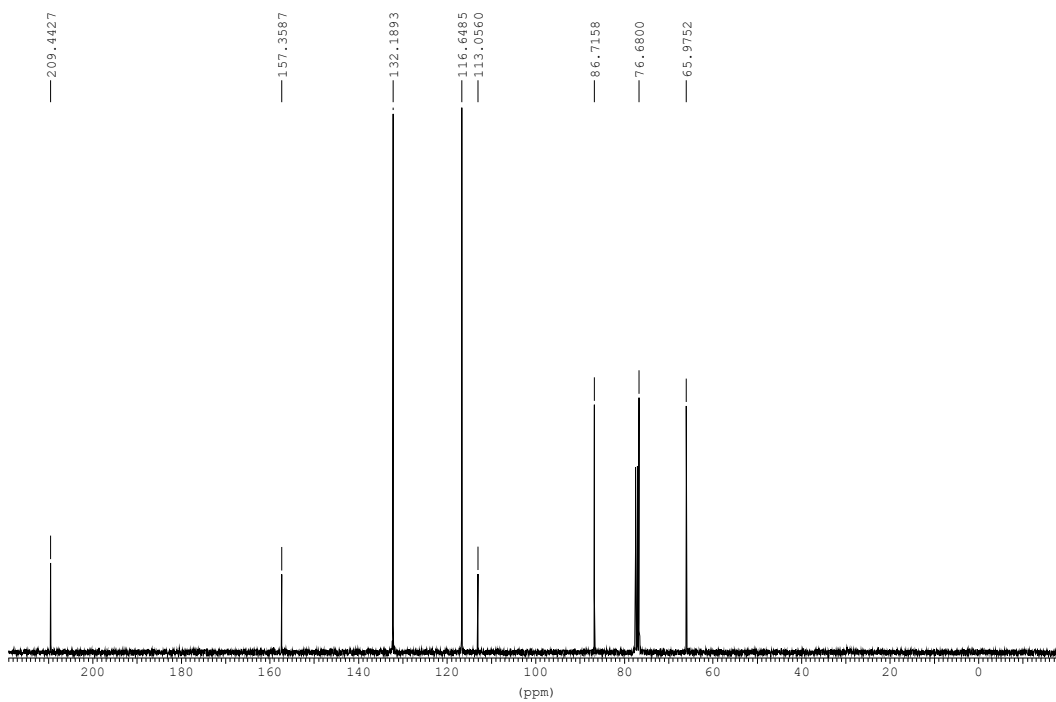



15092017-injector  
Q09TM446B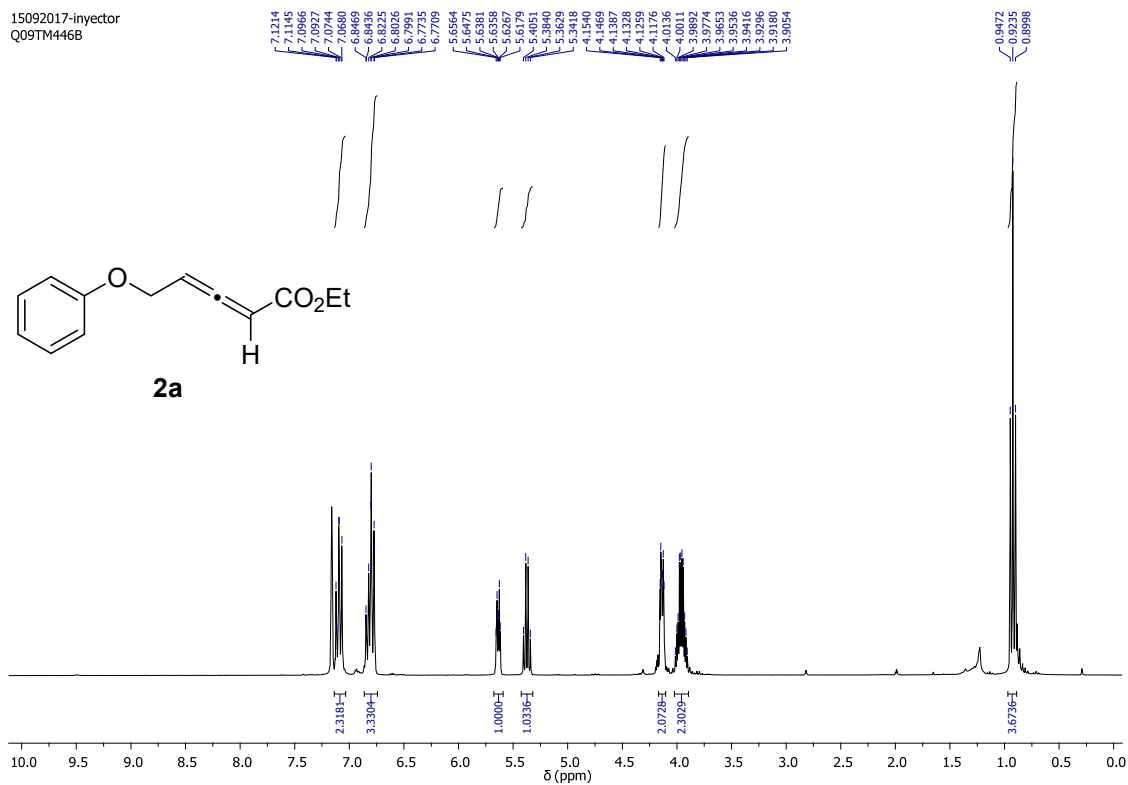15092017-injector  
Q09TM446B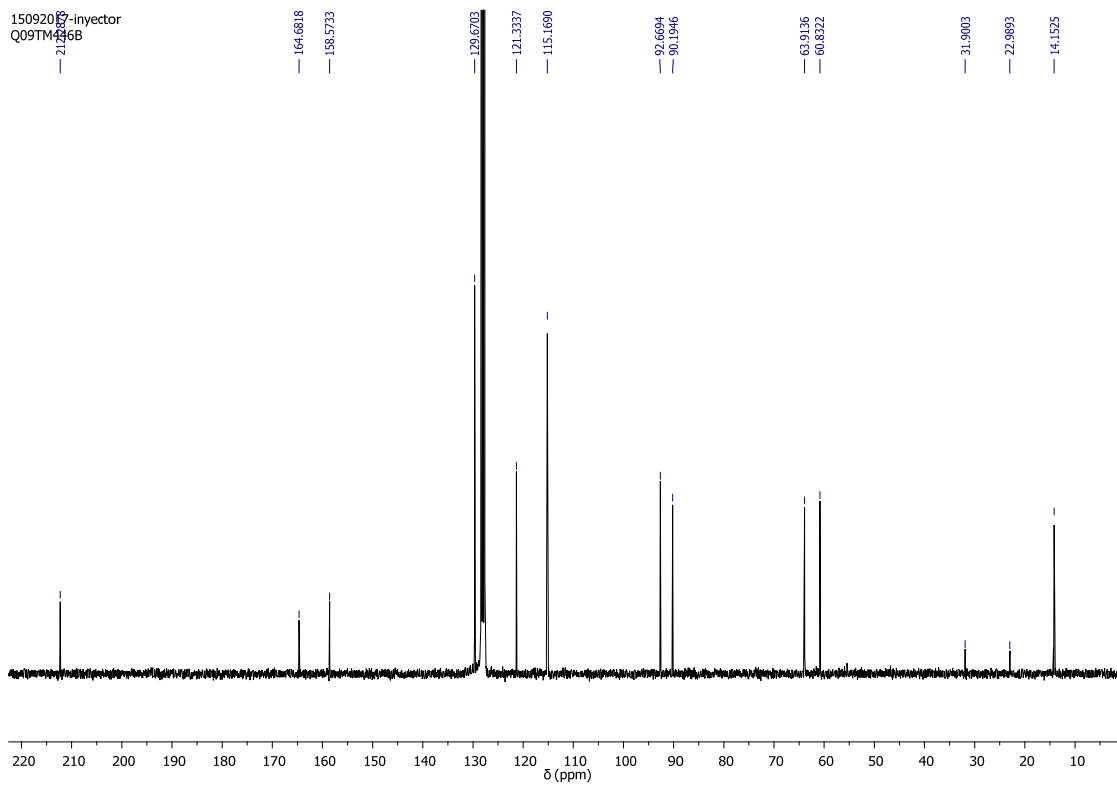

May25-2018-Injector  
Q09TMLM3BC

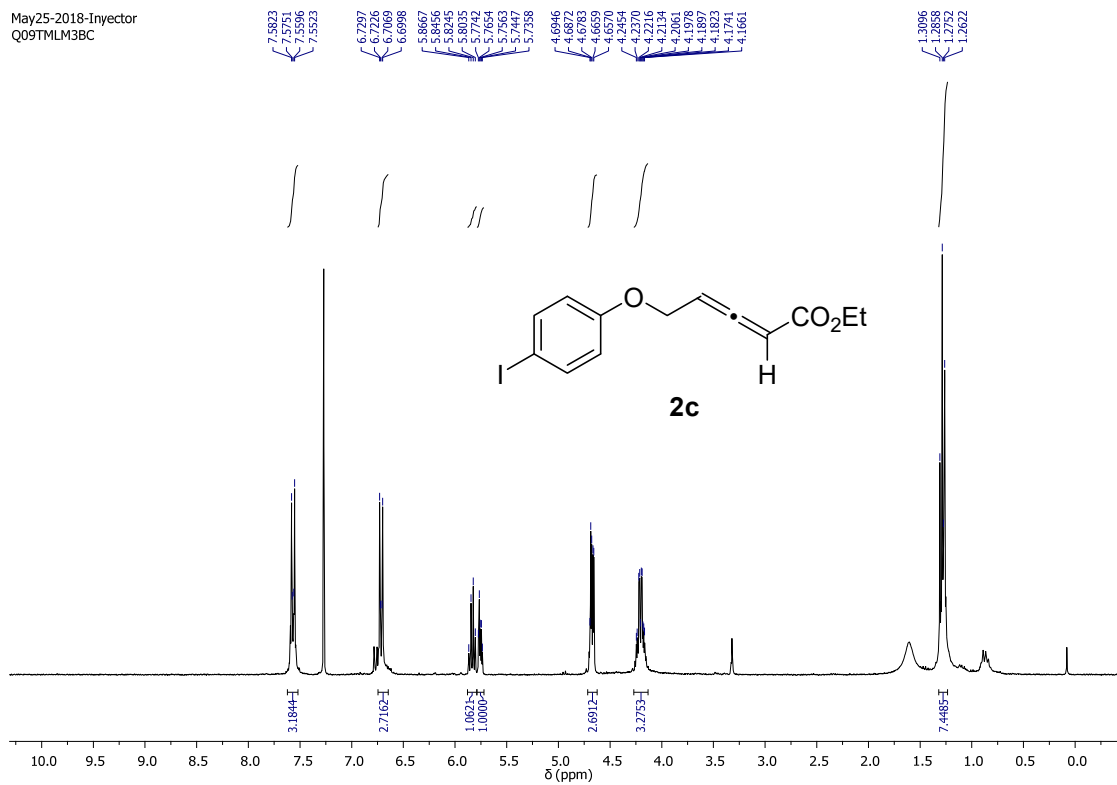

May25-2018-Injector.541.1.1r  
Q09TMLM3BC

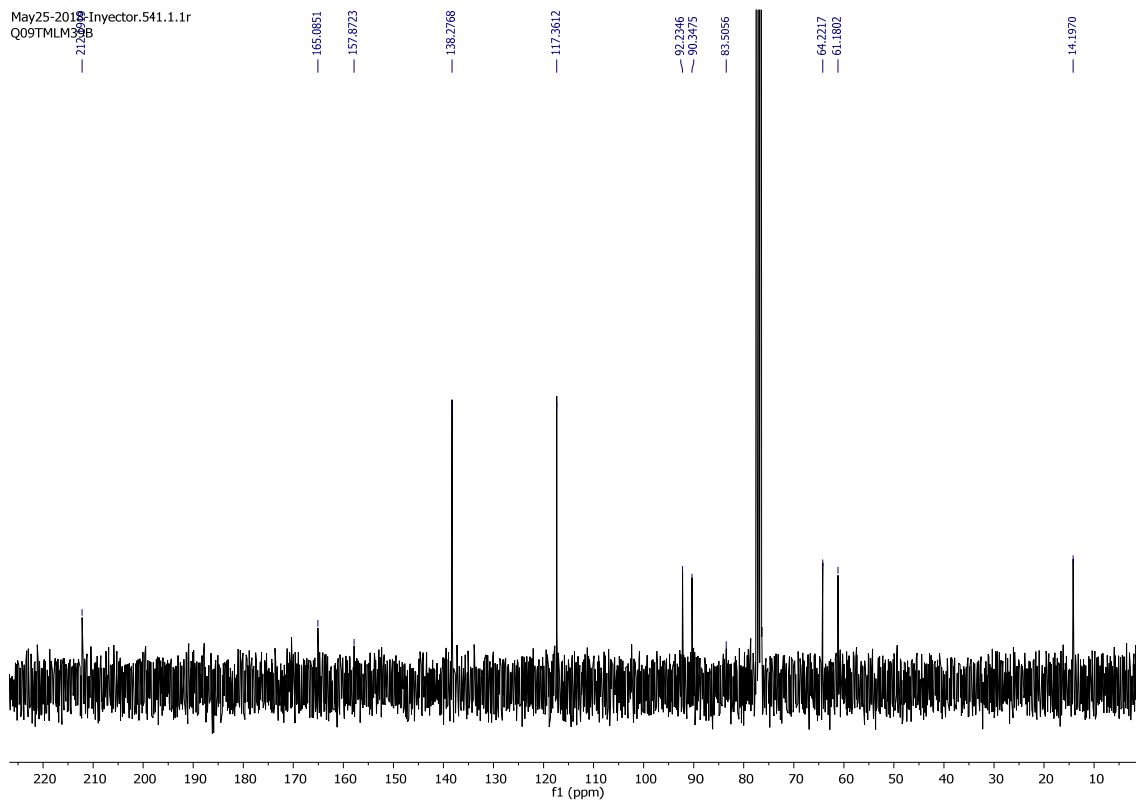

May30-2018-Injector  
Q09TMLM35R

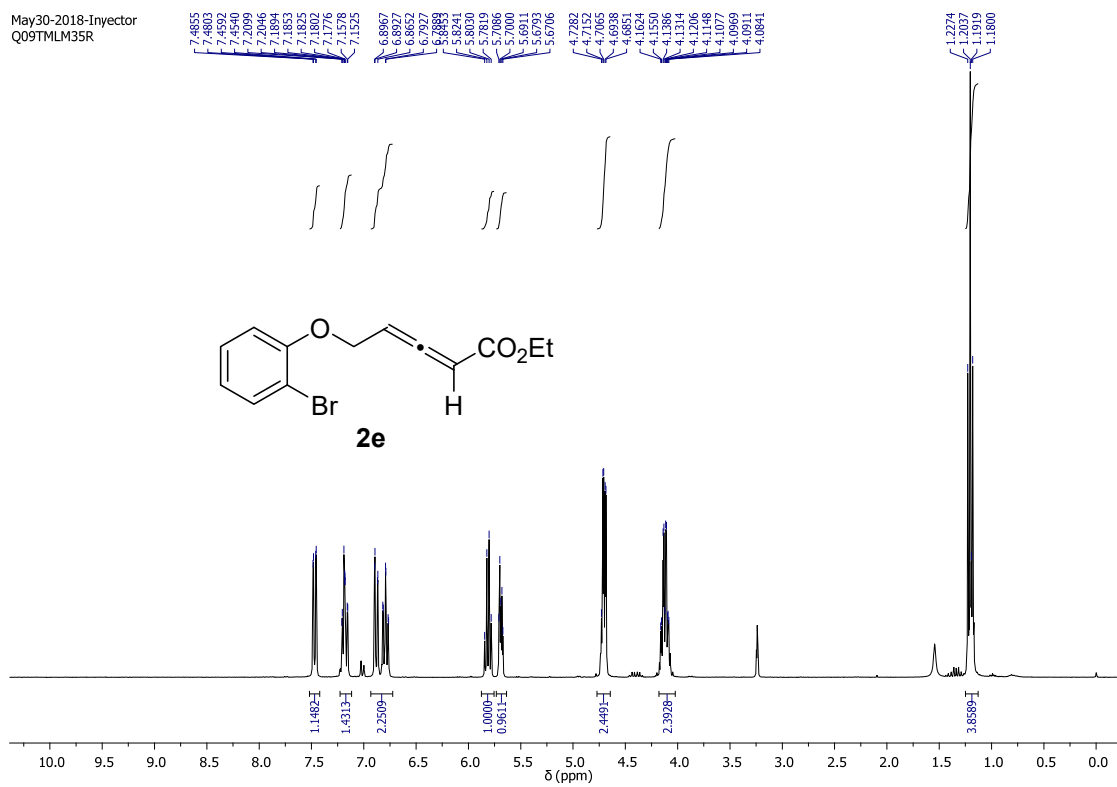

May30-2018-Injector  
Q09TMLM35R

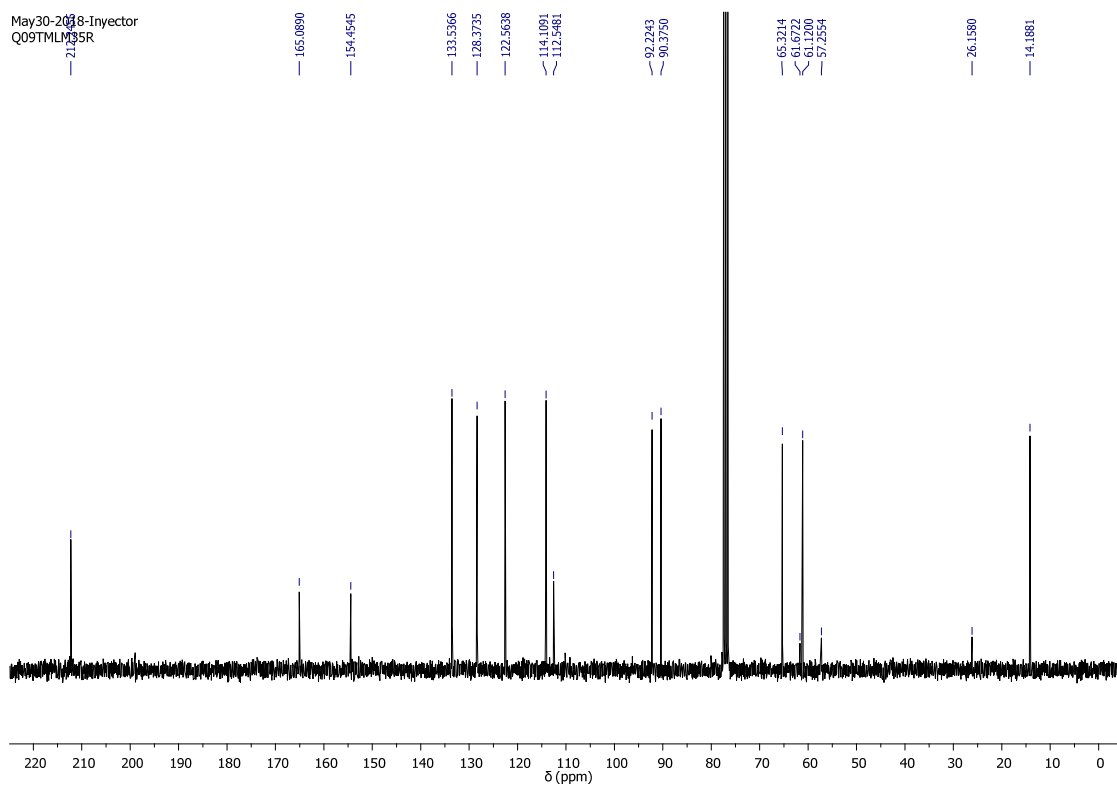

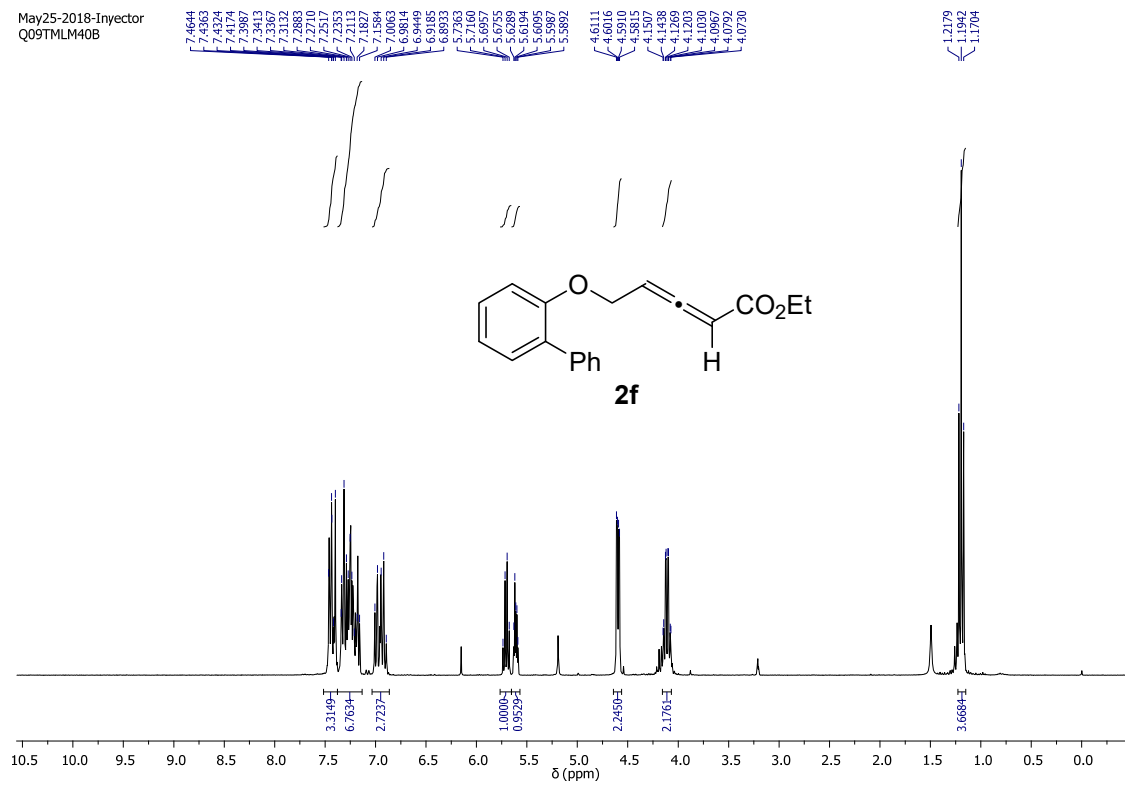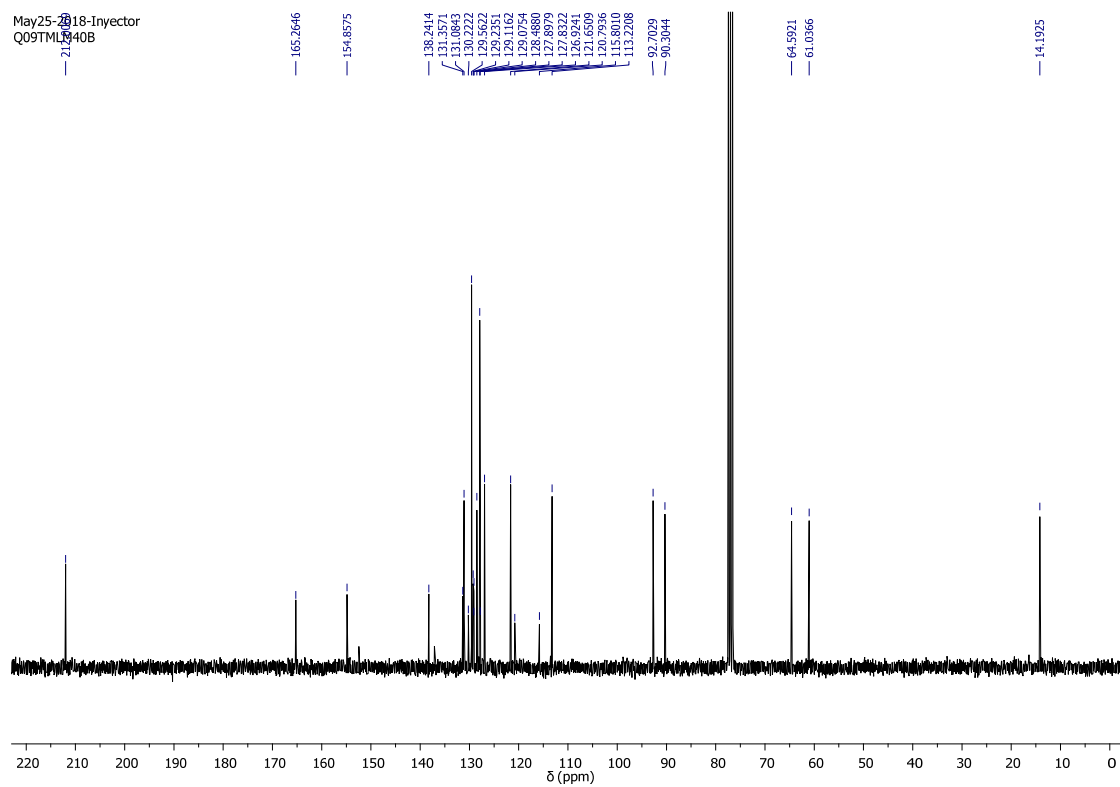

Mar13-2018-Injector  
Q09TMLM11B

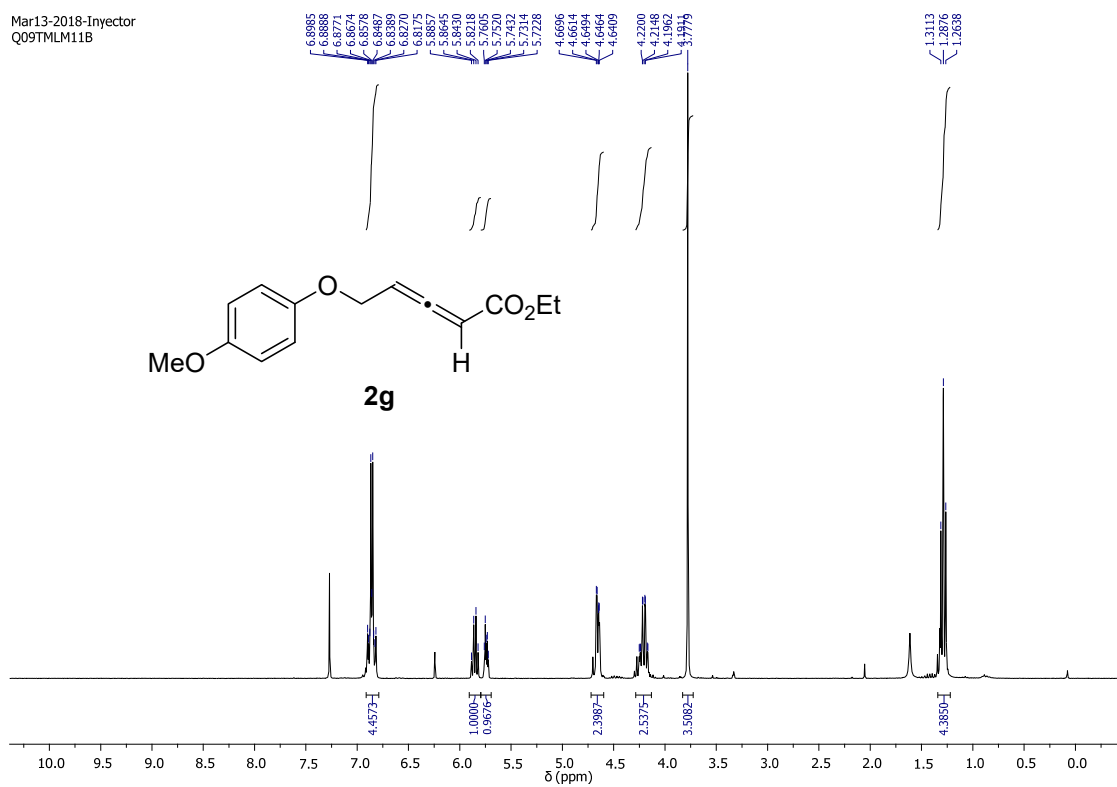

Mar13-2018-Injector  
Q09TMLM11B

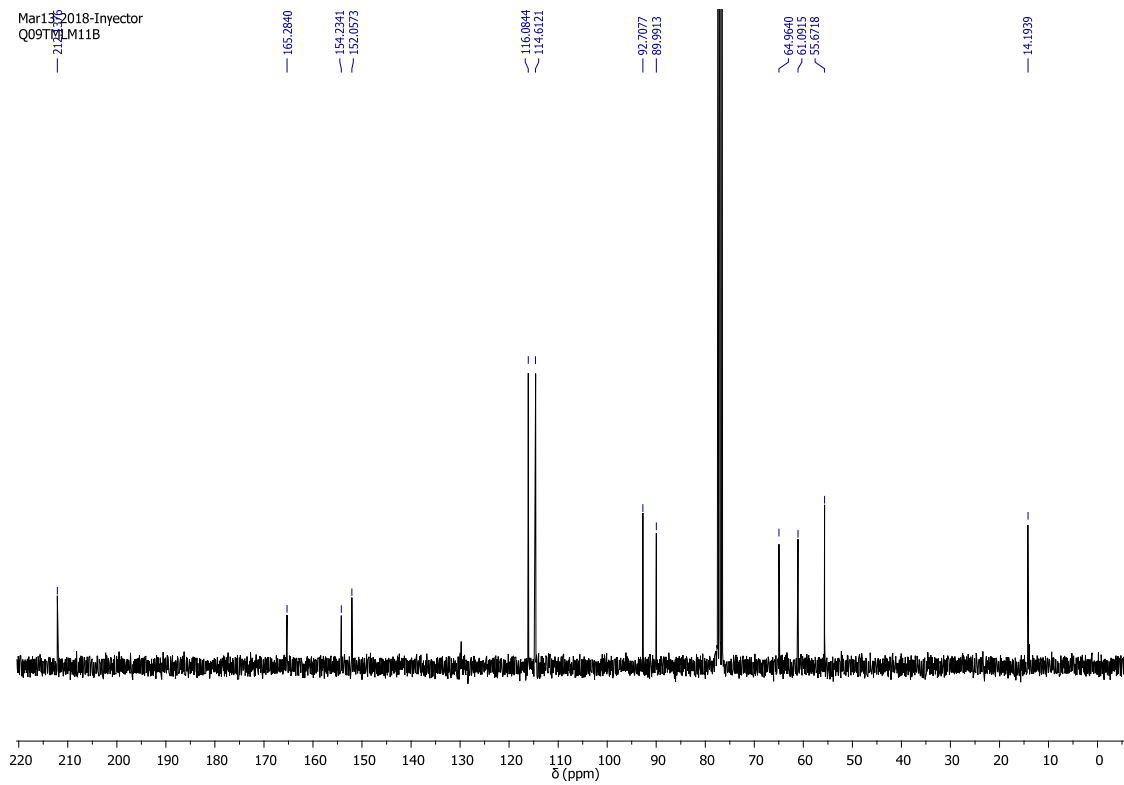

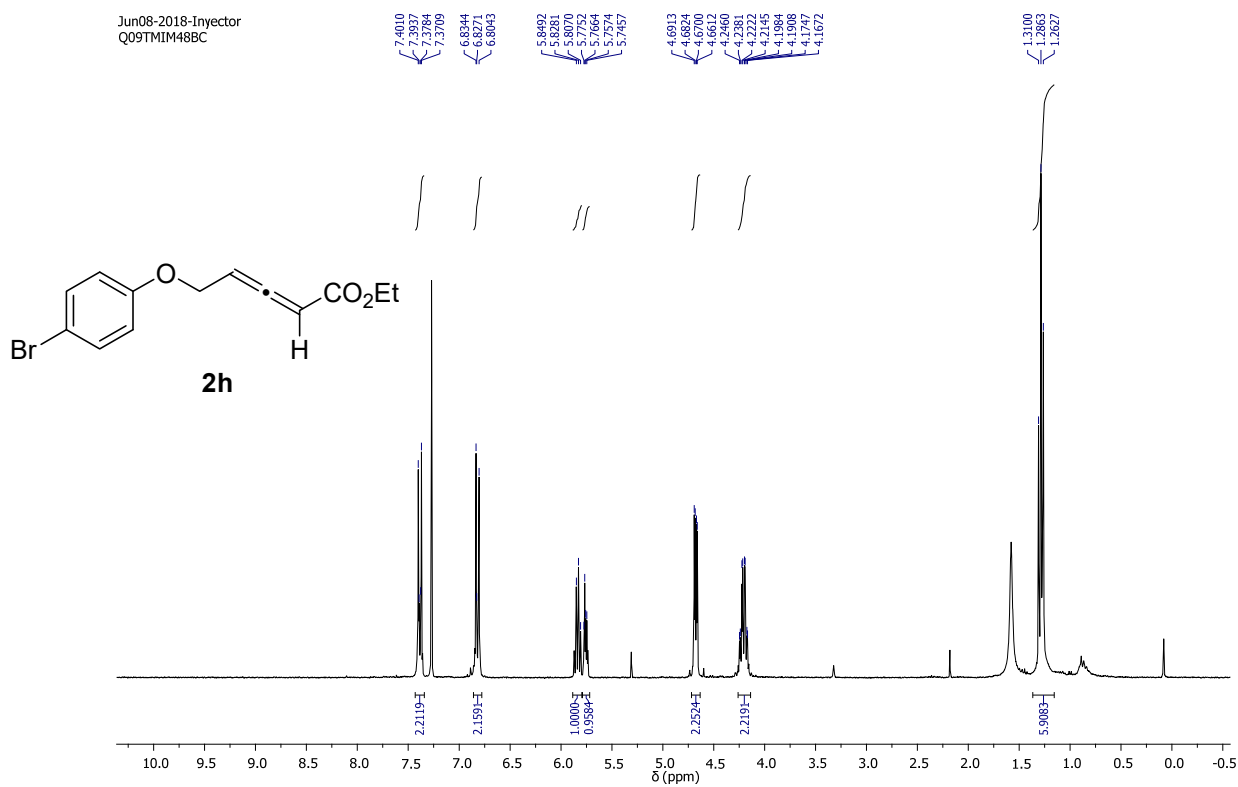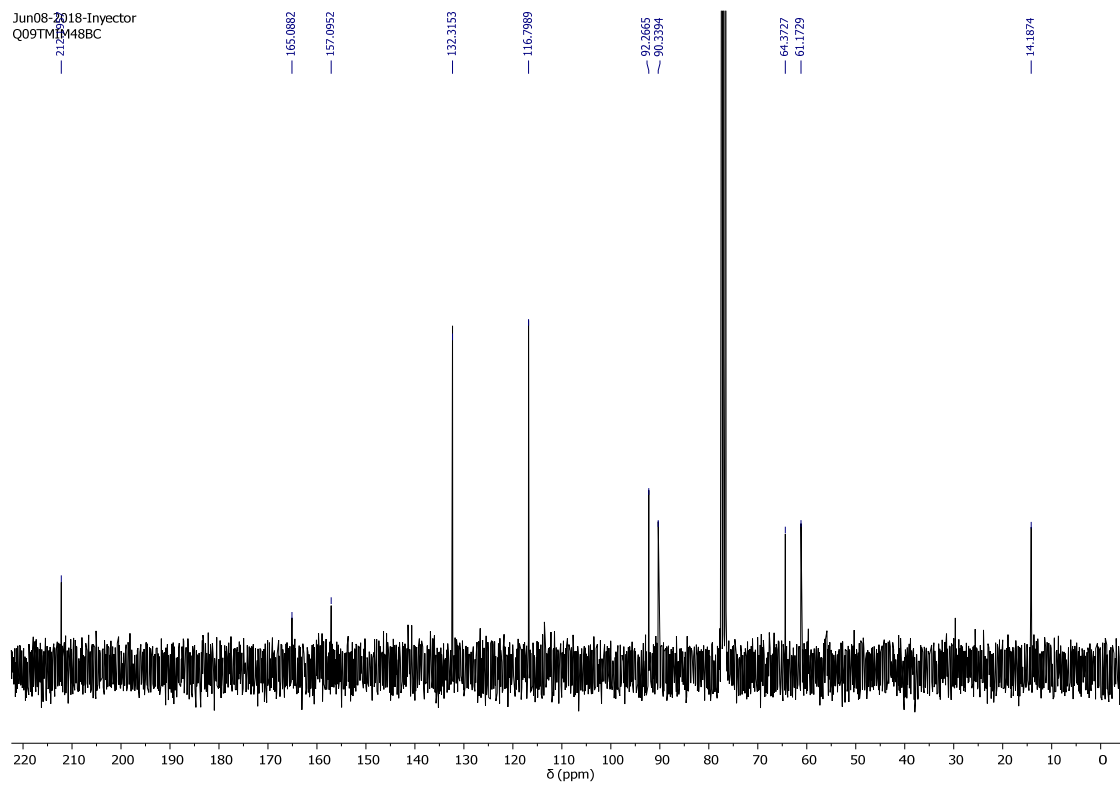

Feb09-2017-injector  
Q09TM430D

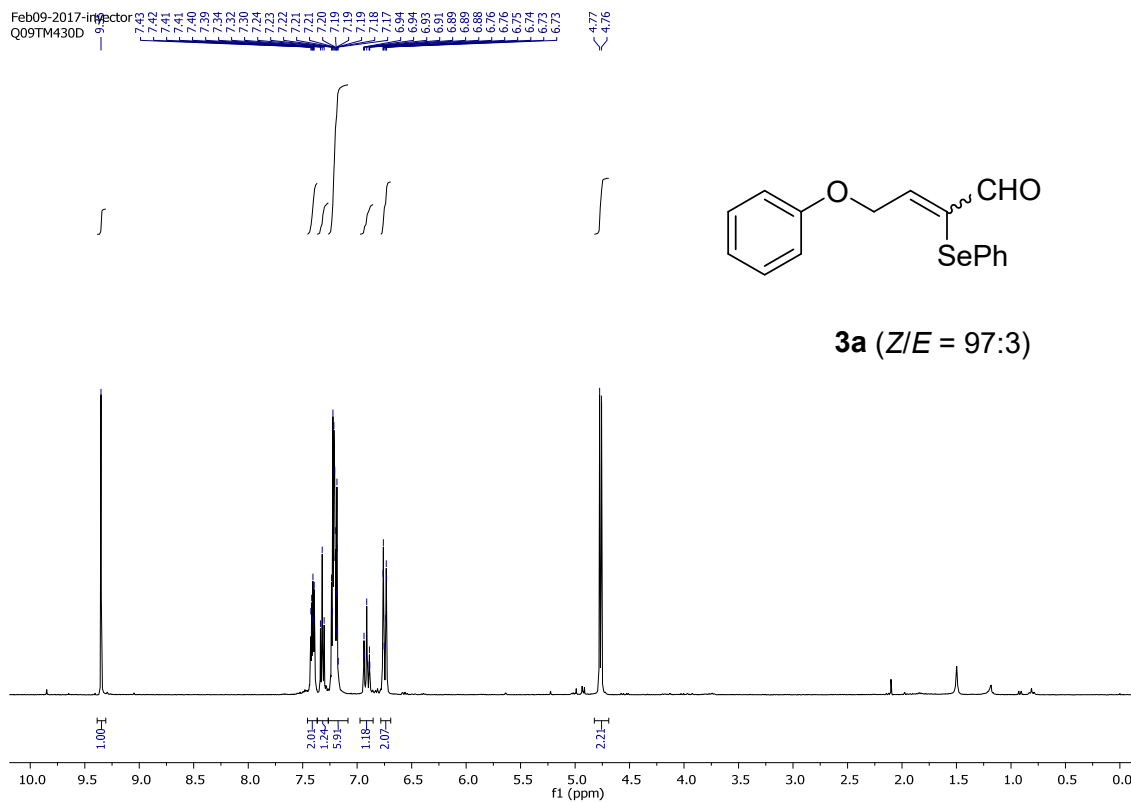

Q09TM430D

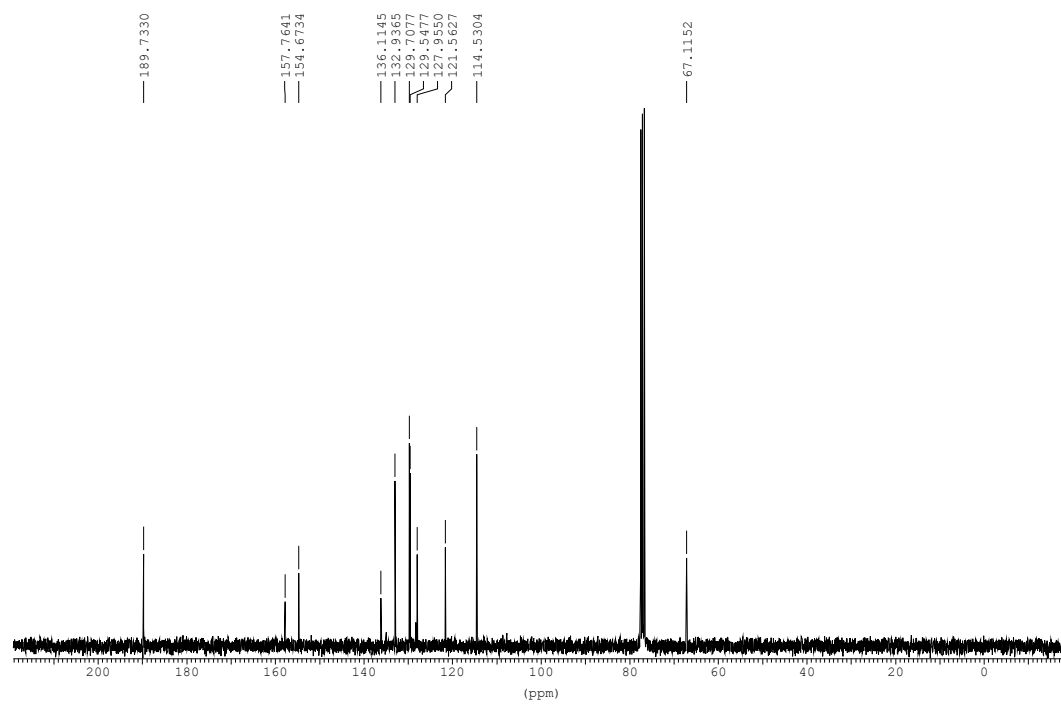

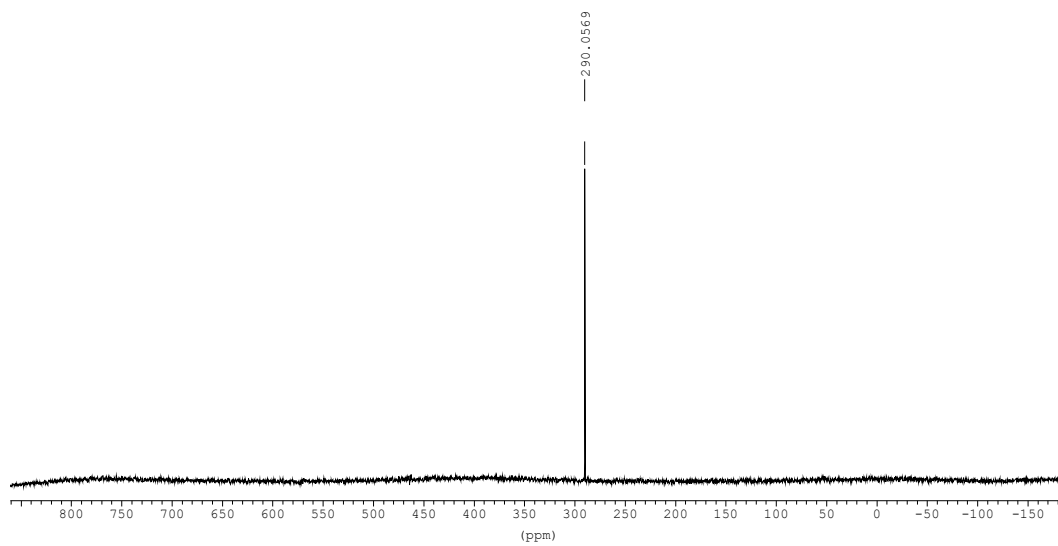





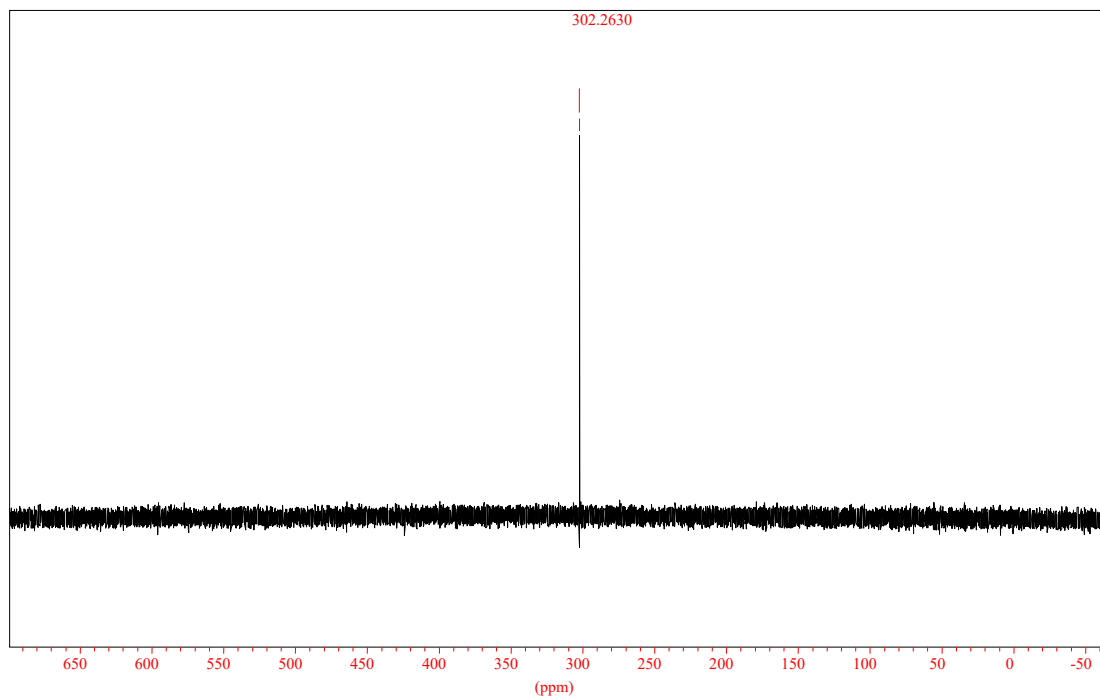

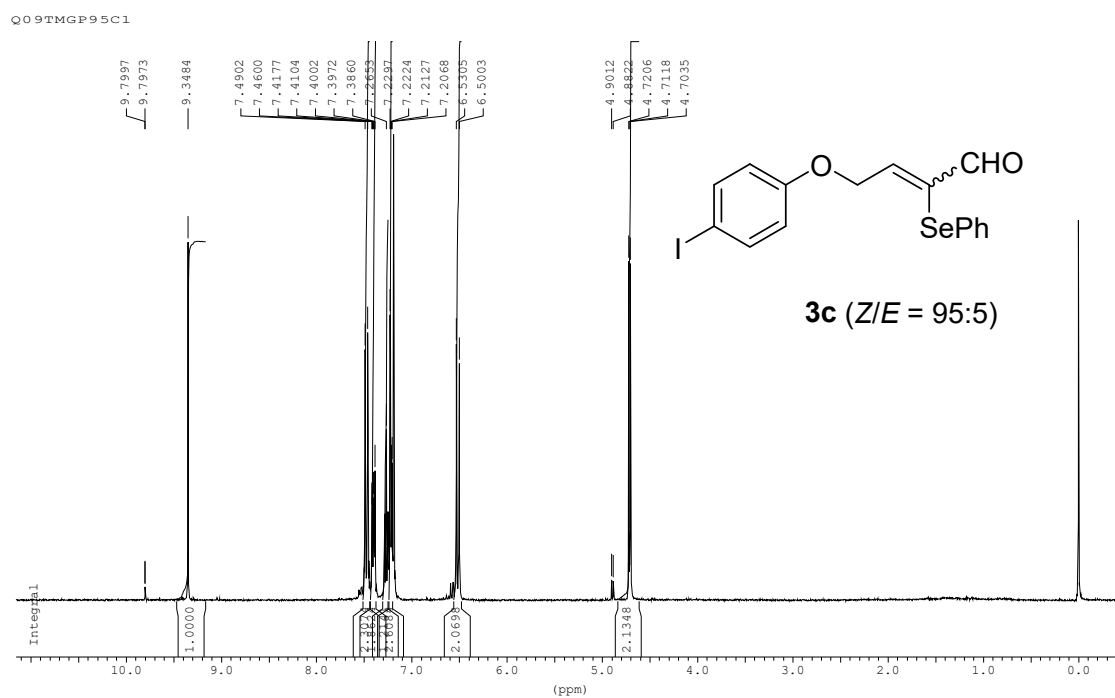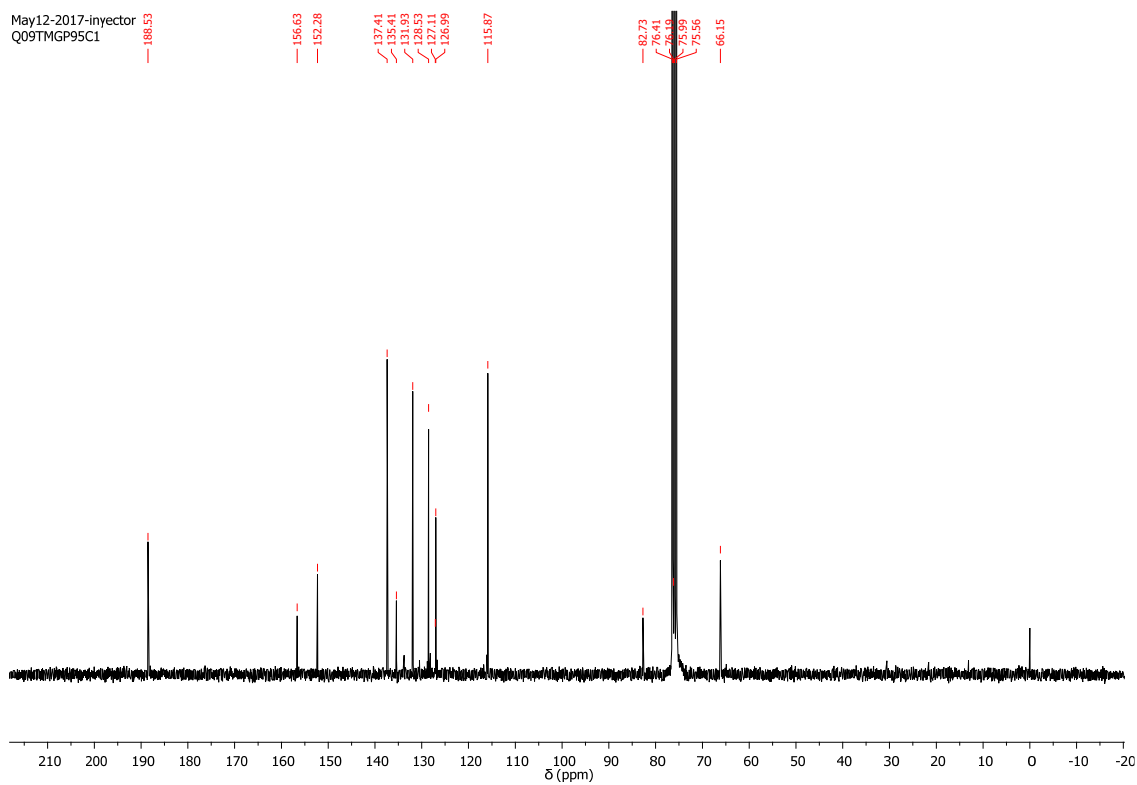

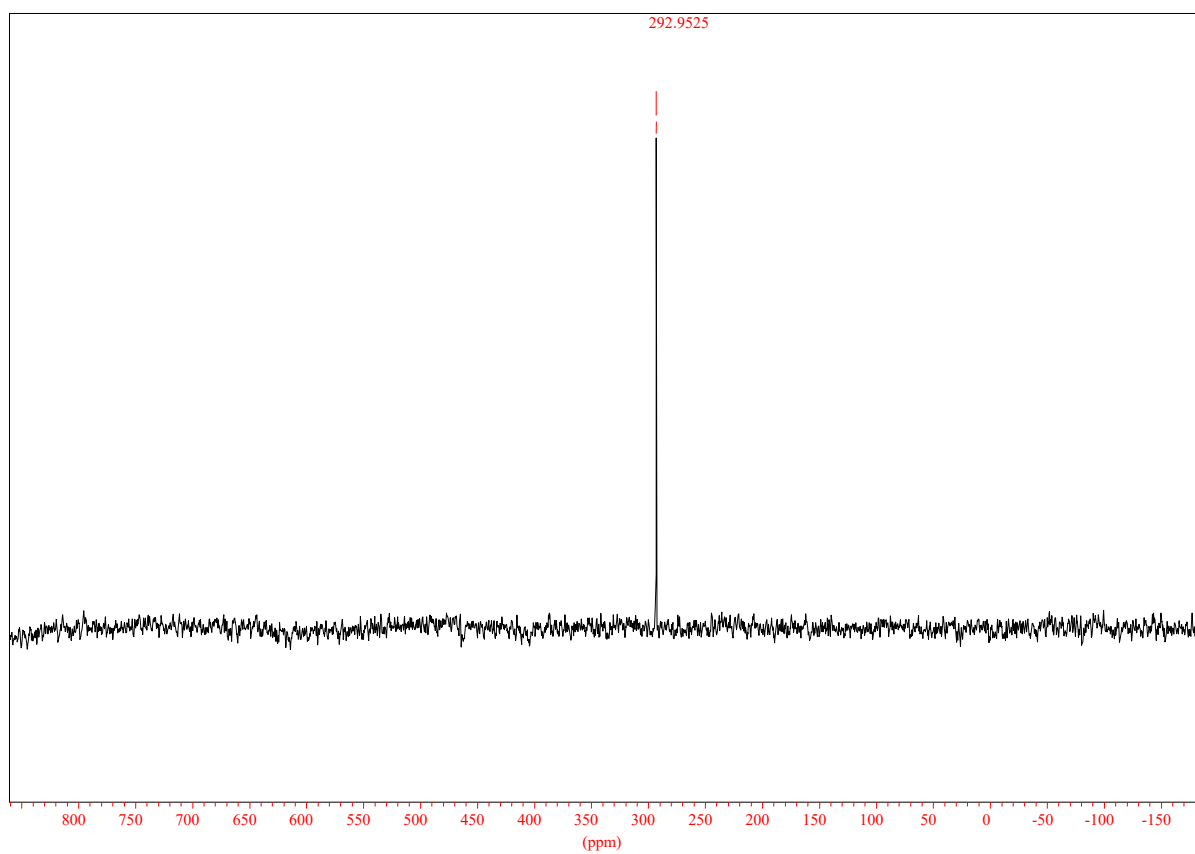

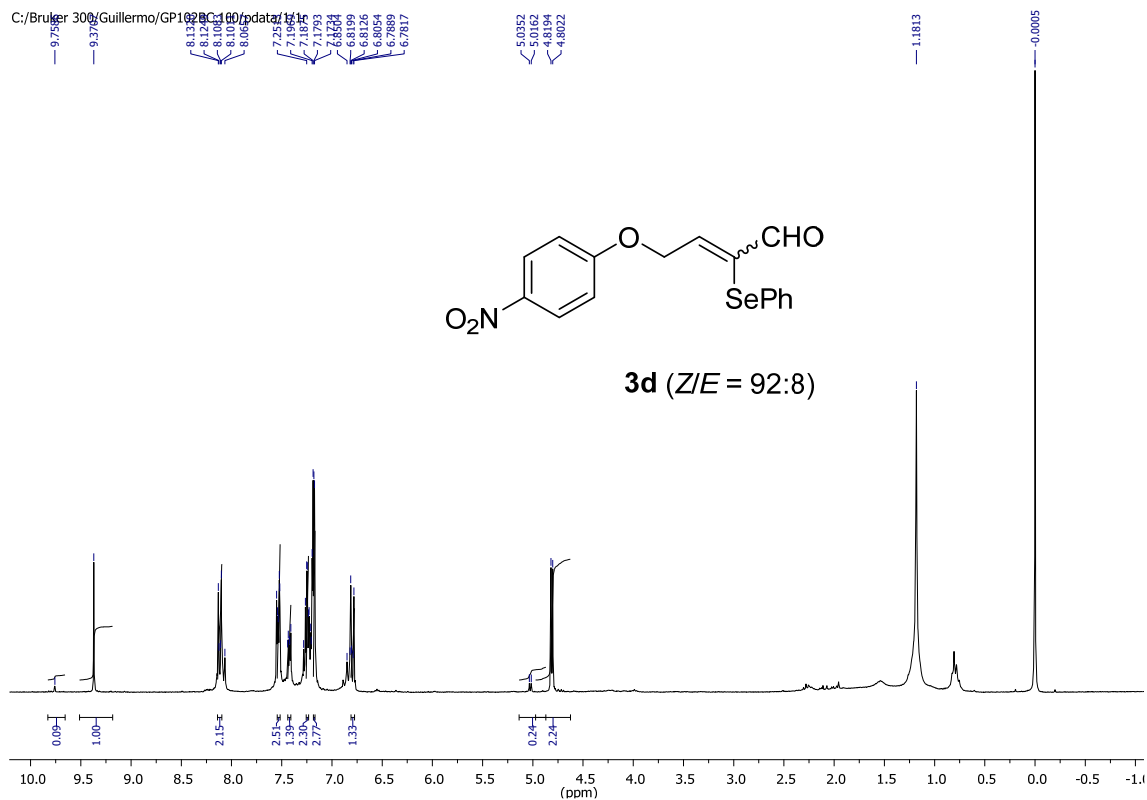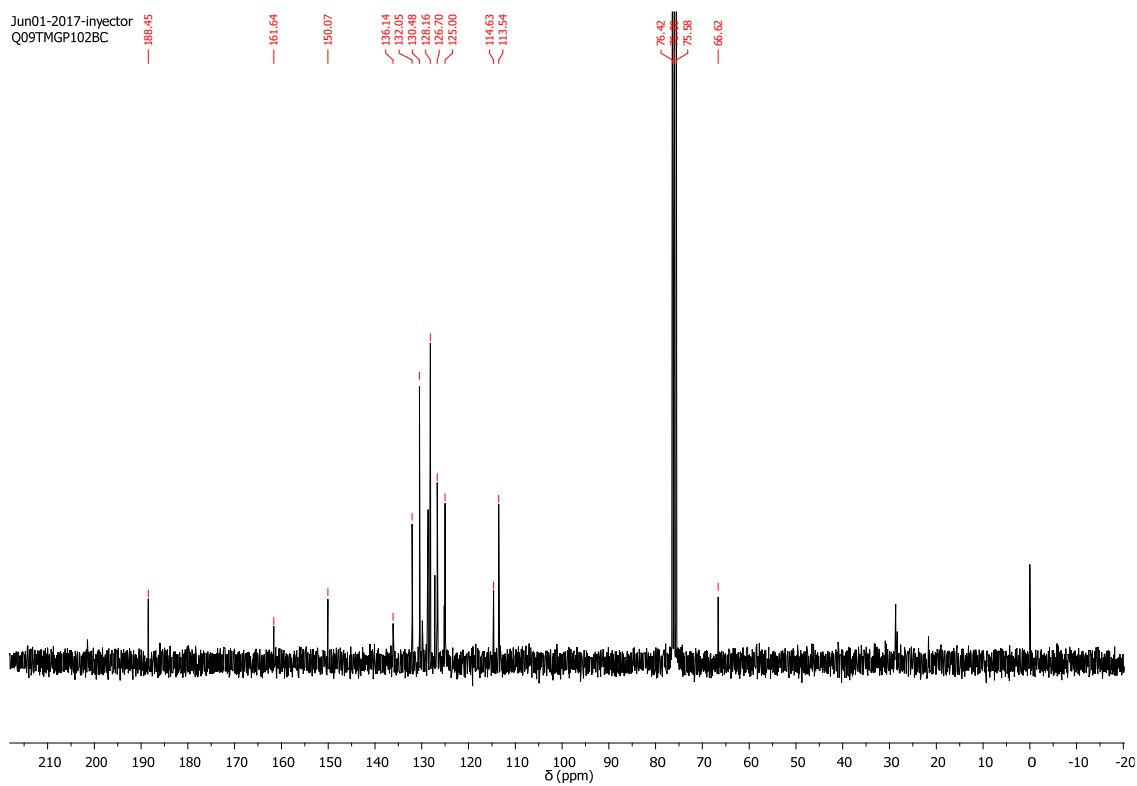

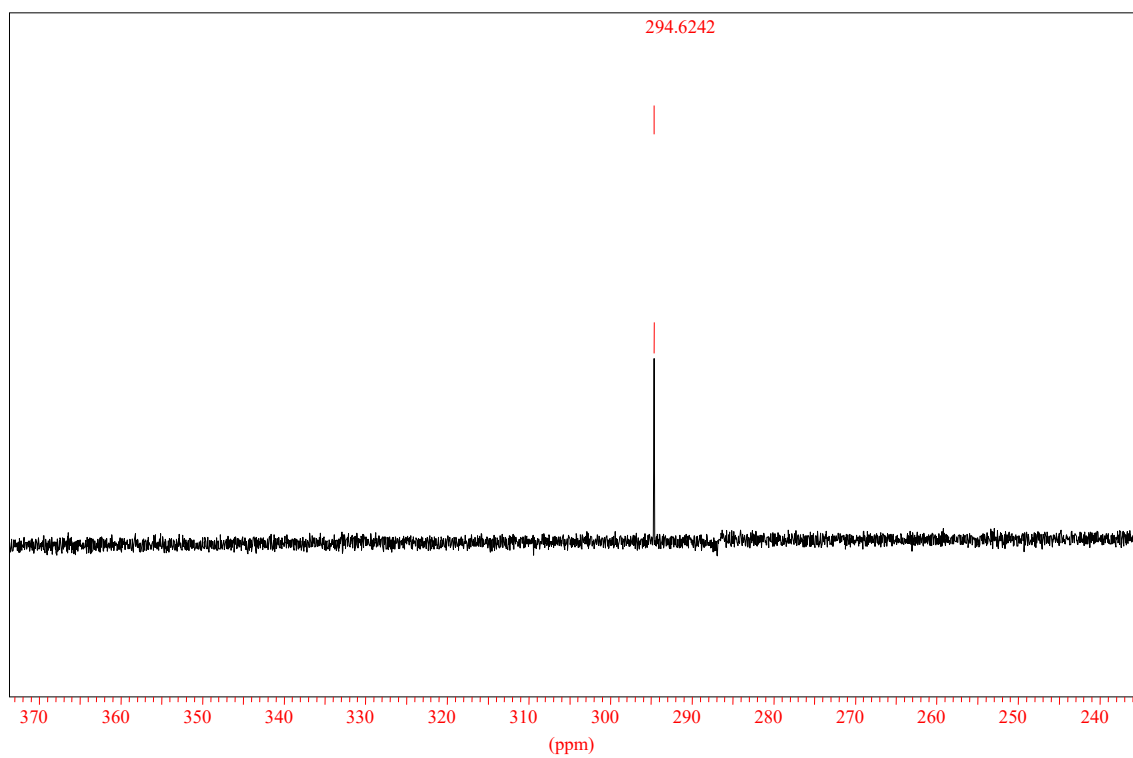

Q09TMGP110B1

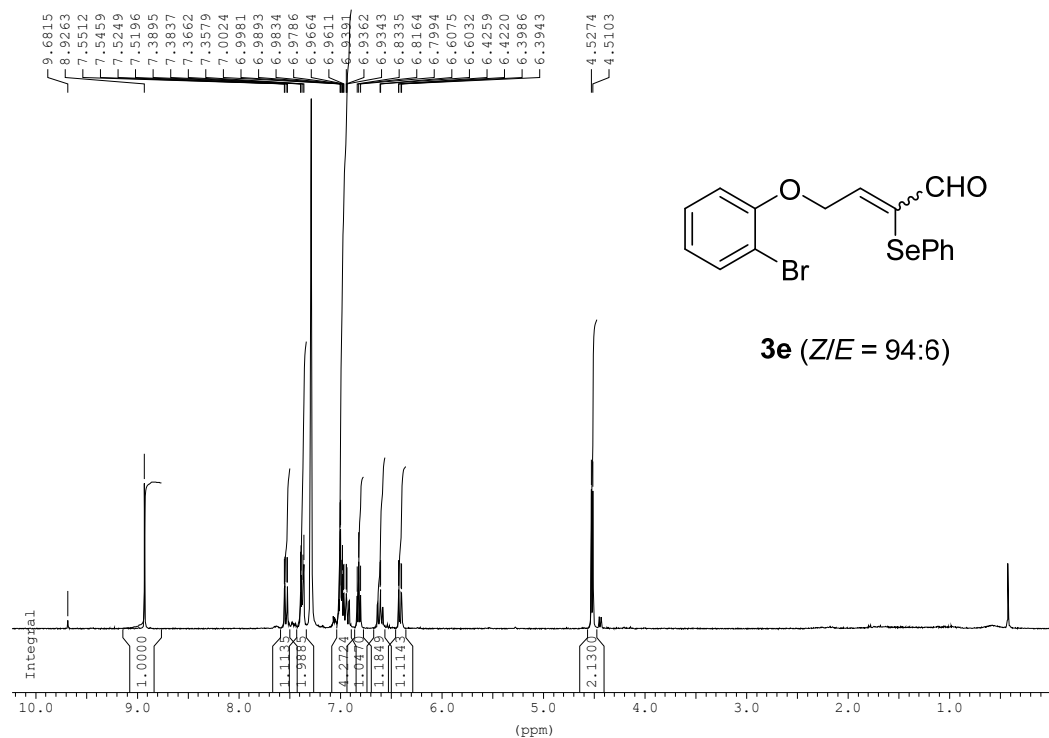09062017-injector  
Q09TMGP110B1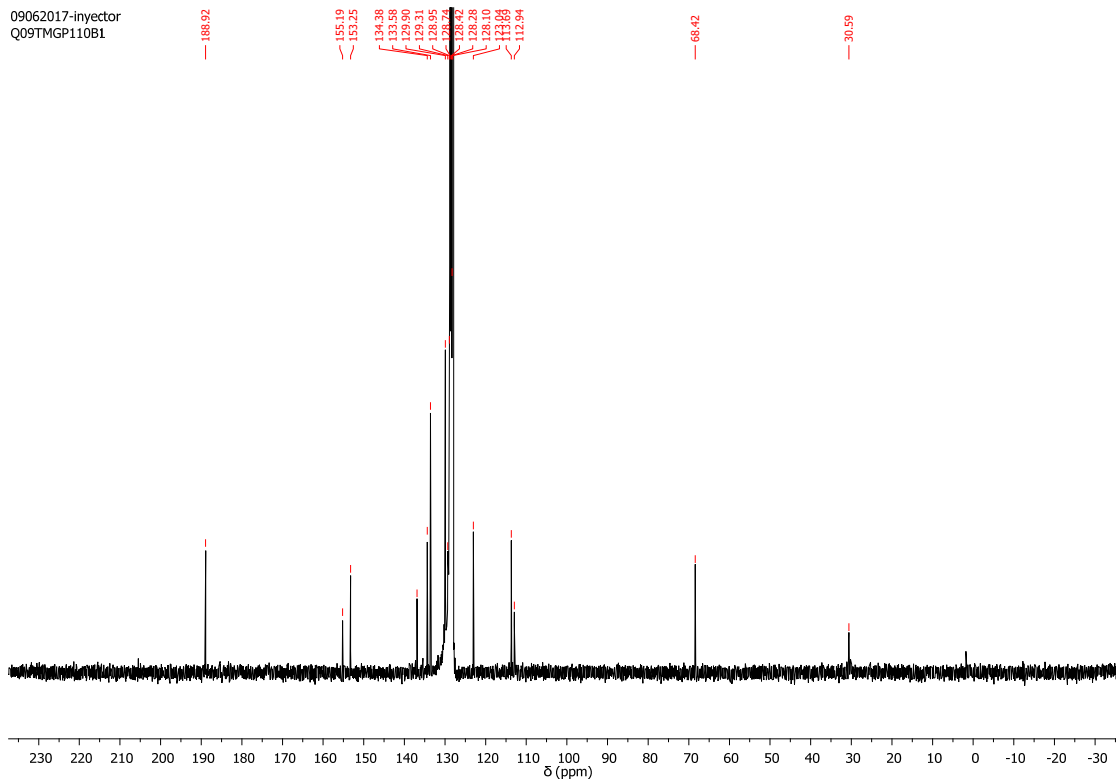

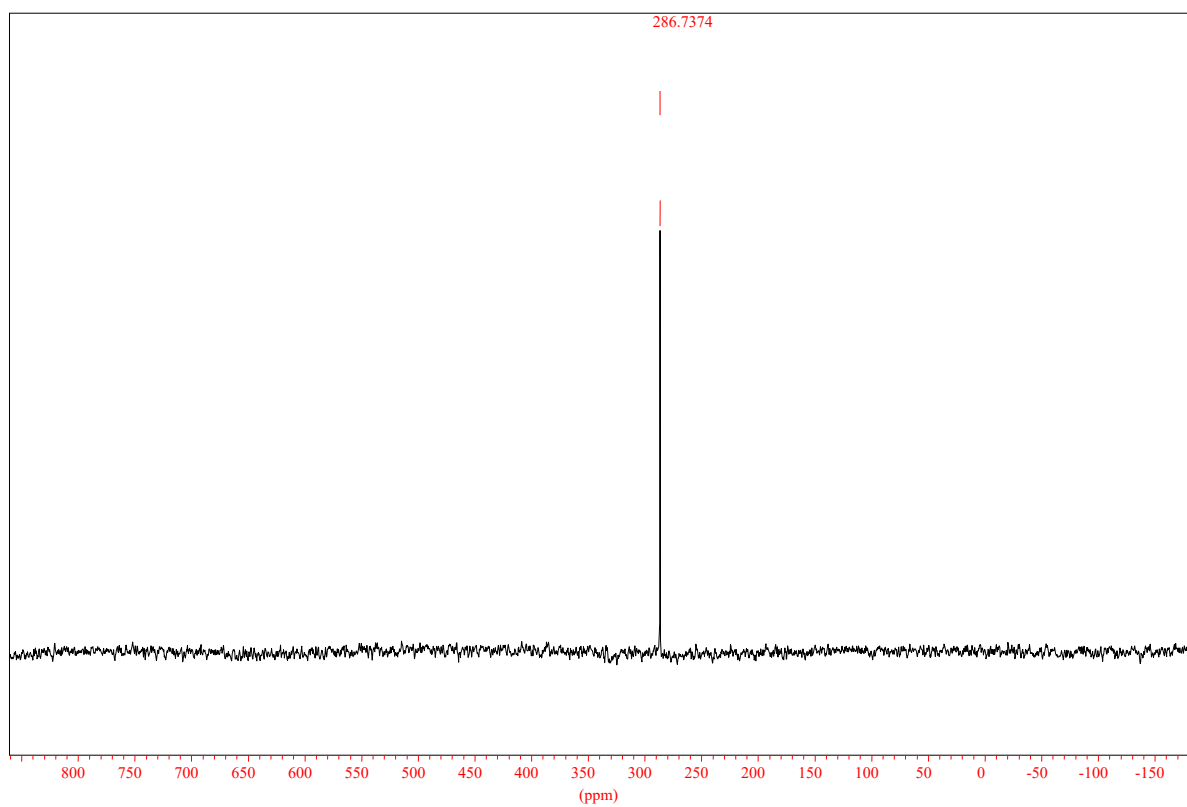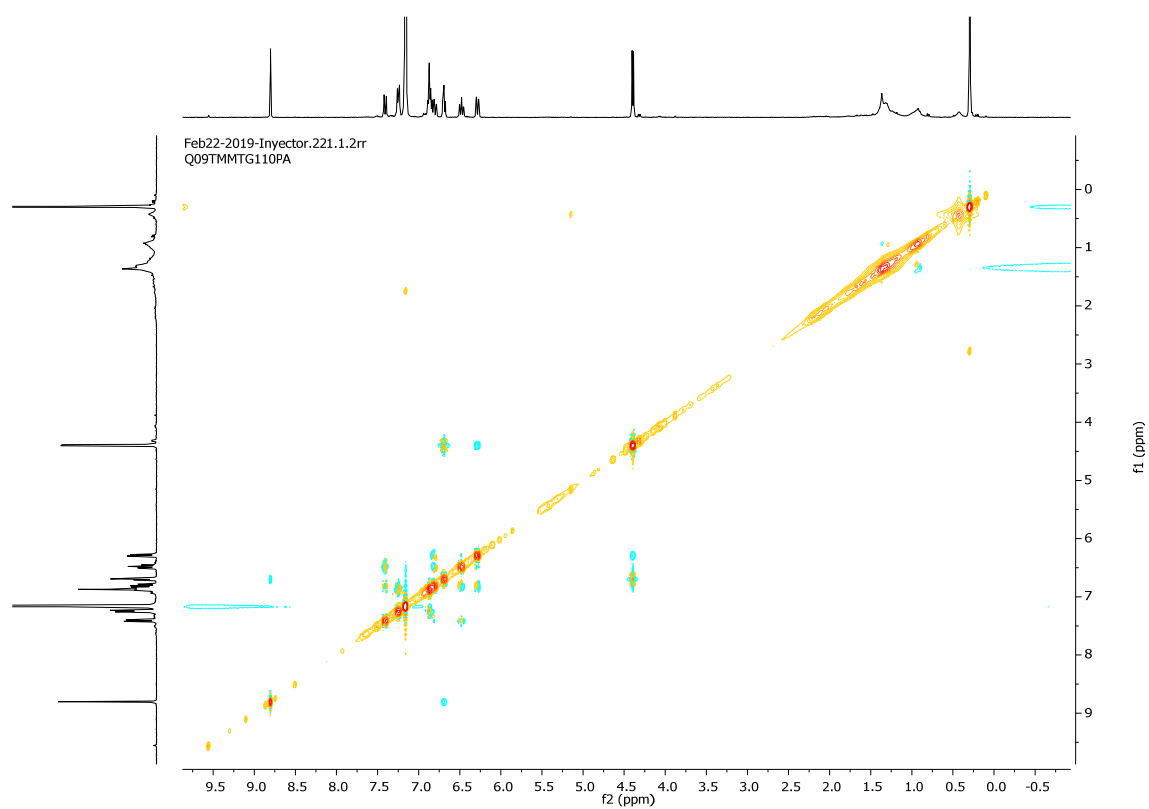



Q09TMGP111B

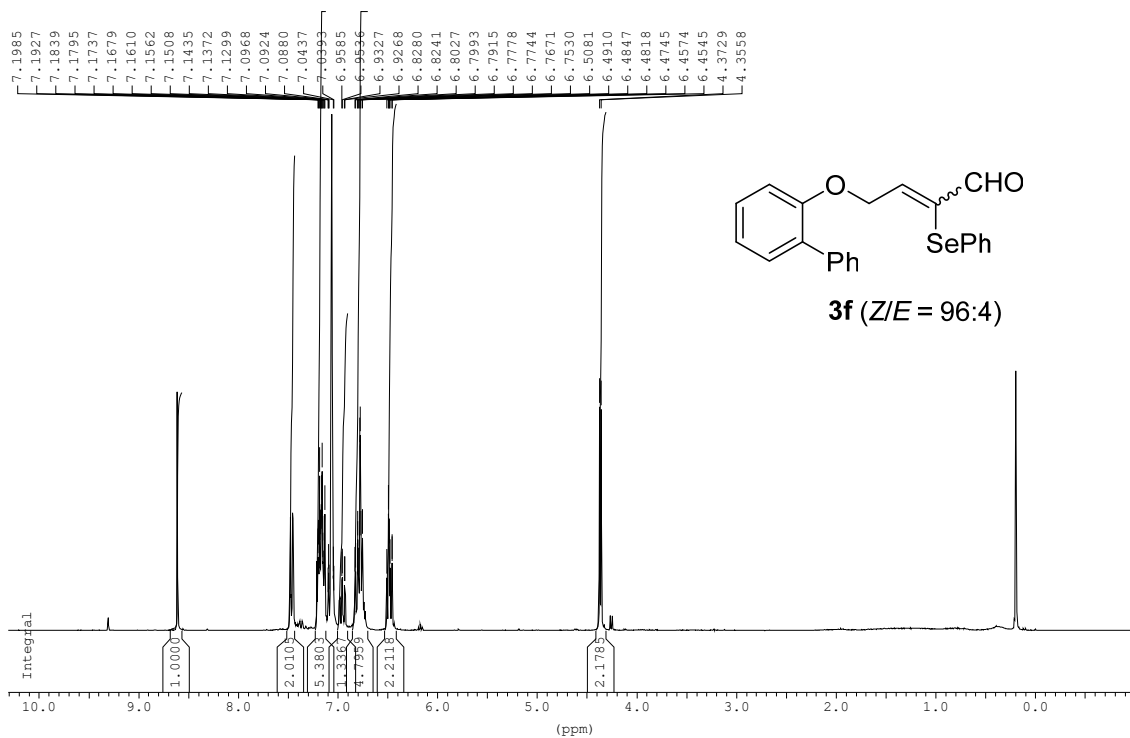Jun08-2017-injector  
Q09TMGP111B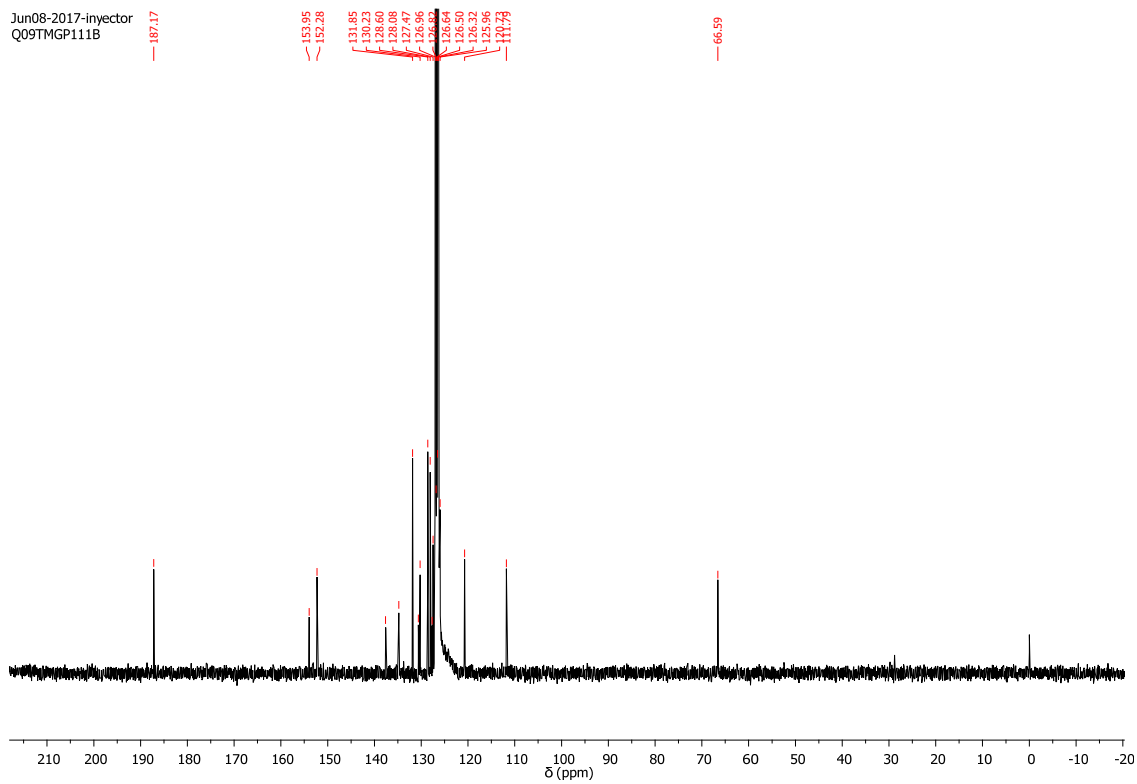

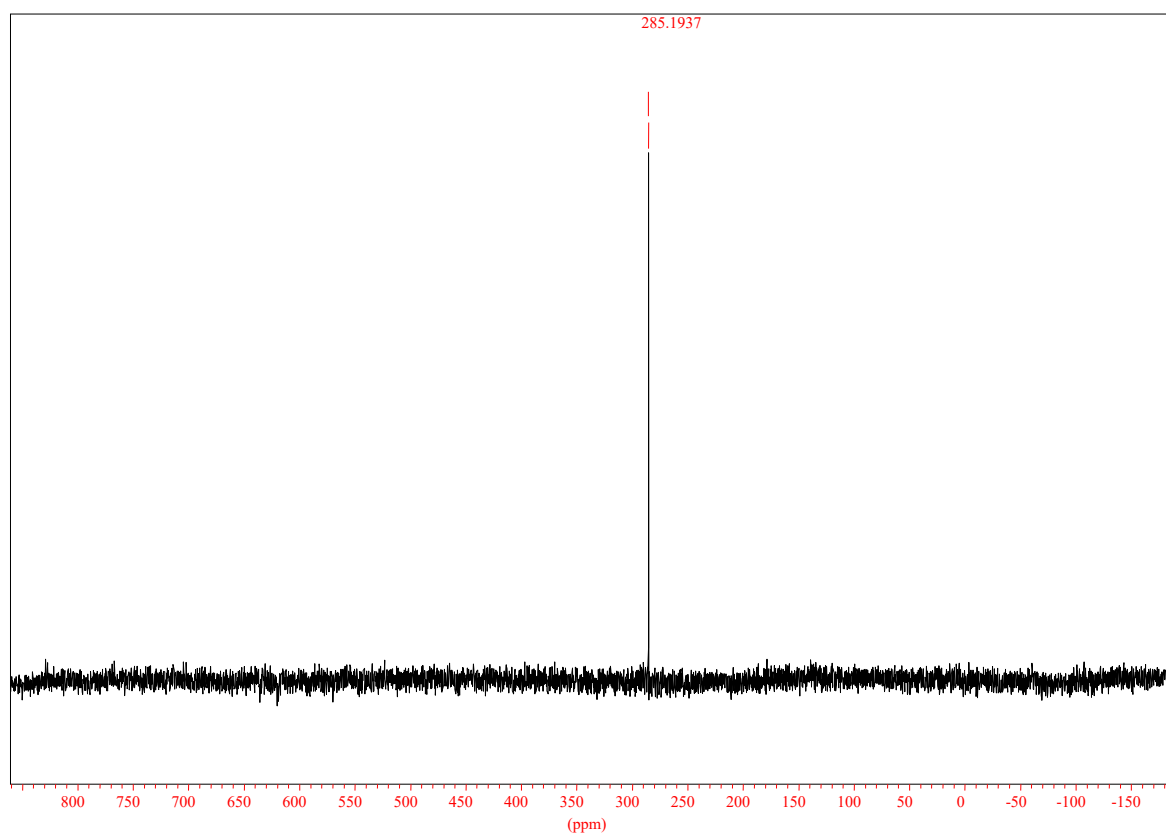

Q09TM437B

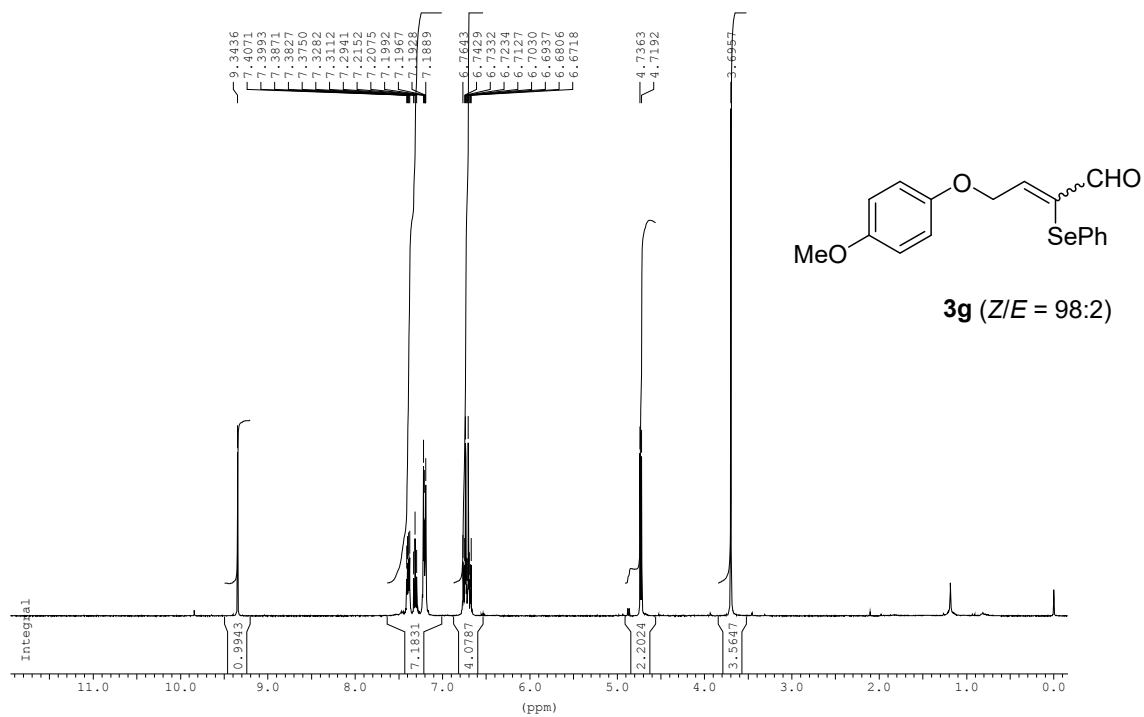

Q09TM437B

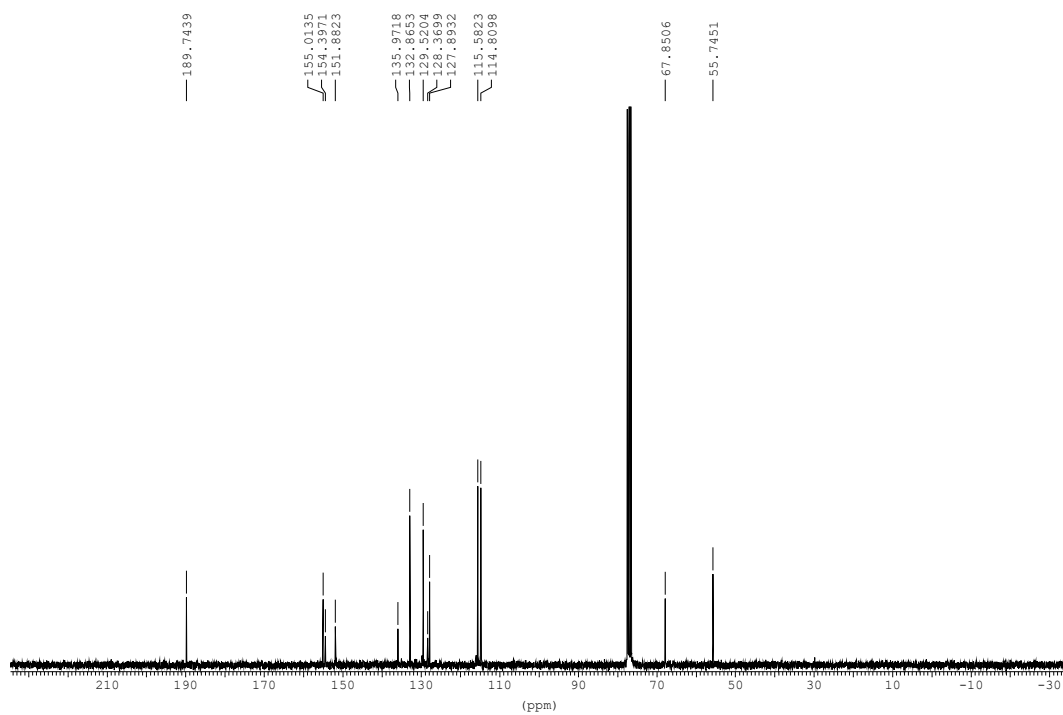

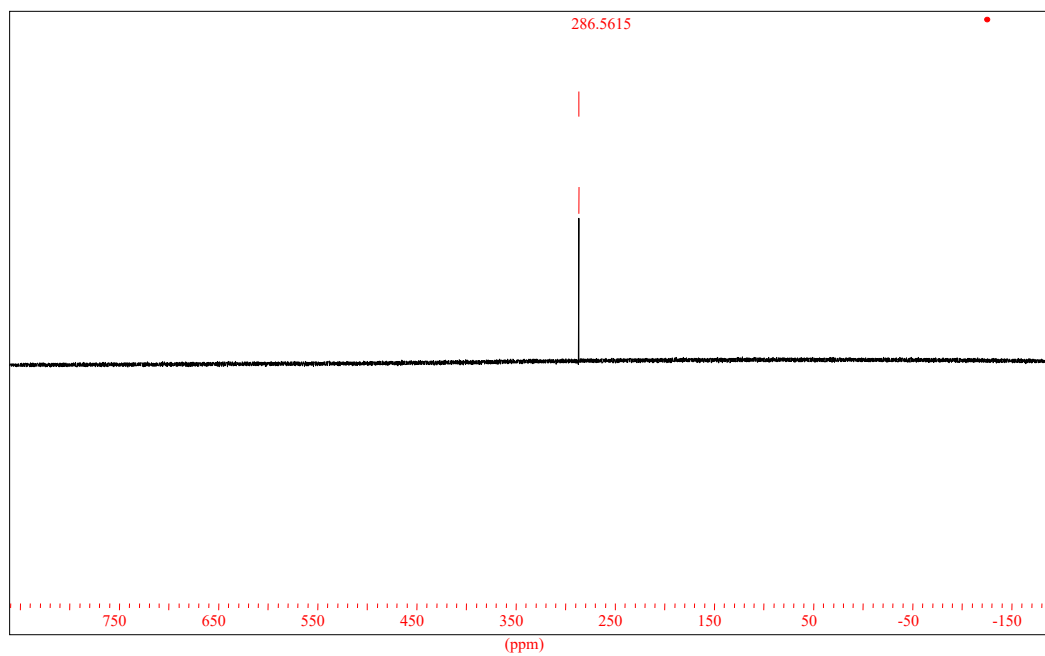

Q09TM441C

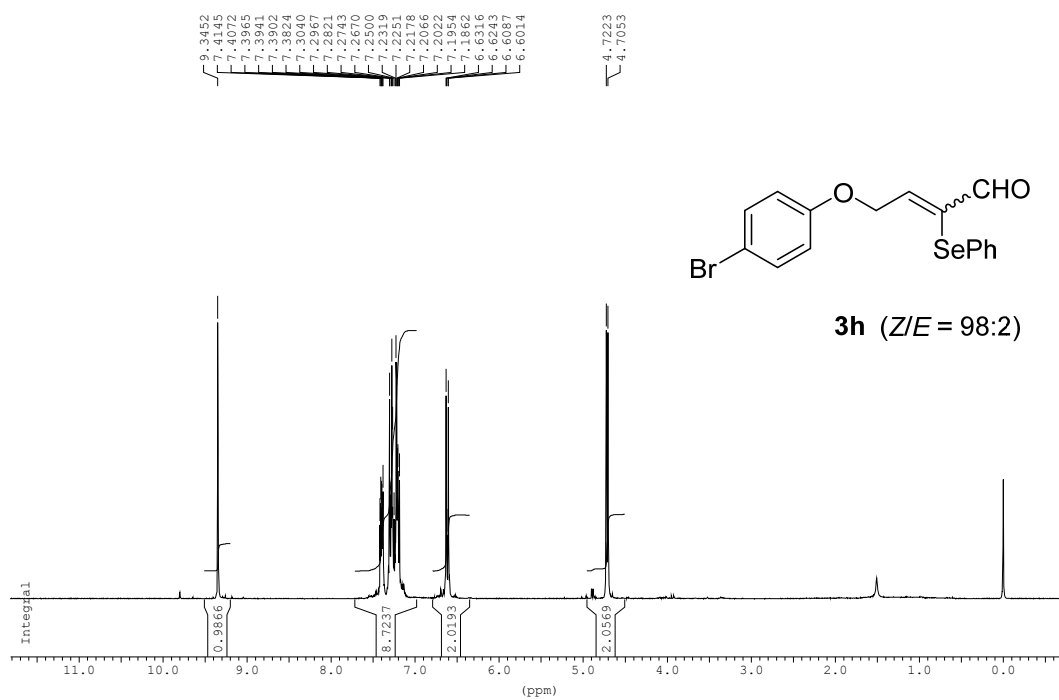

Q09TM441C

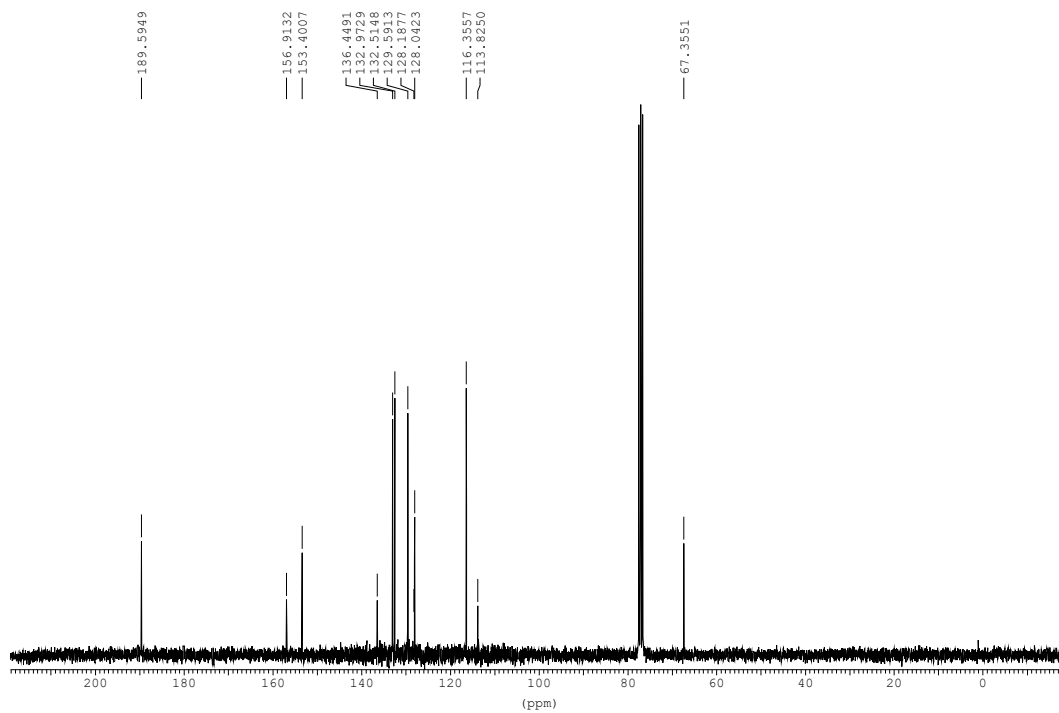

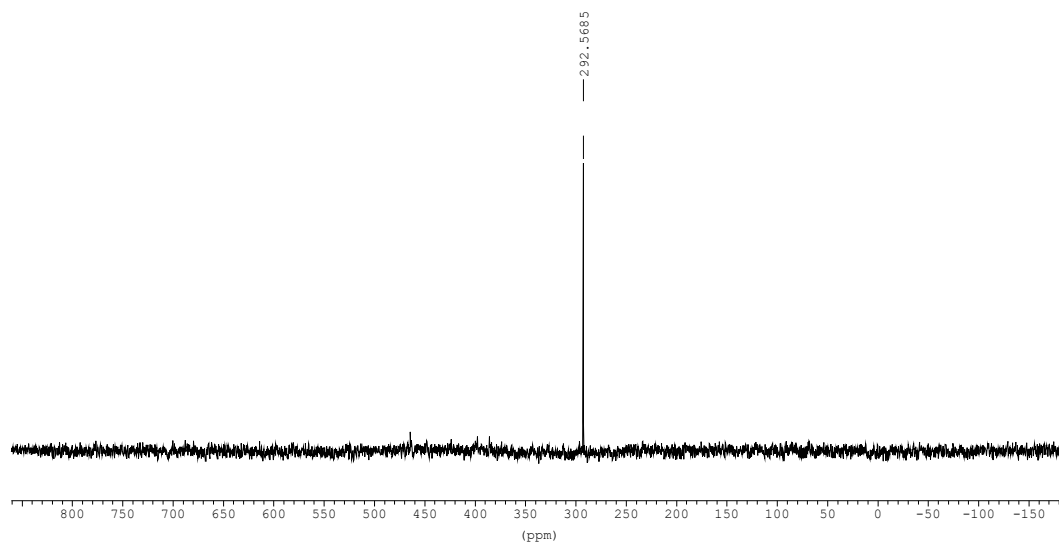

Q09TMGP96B

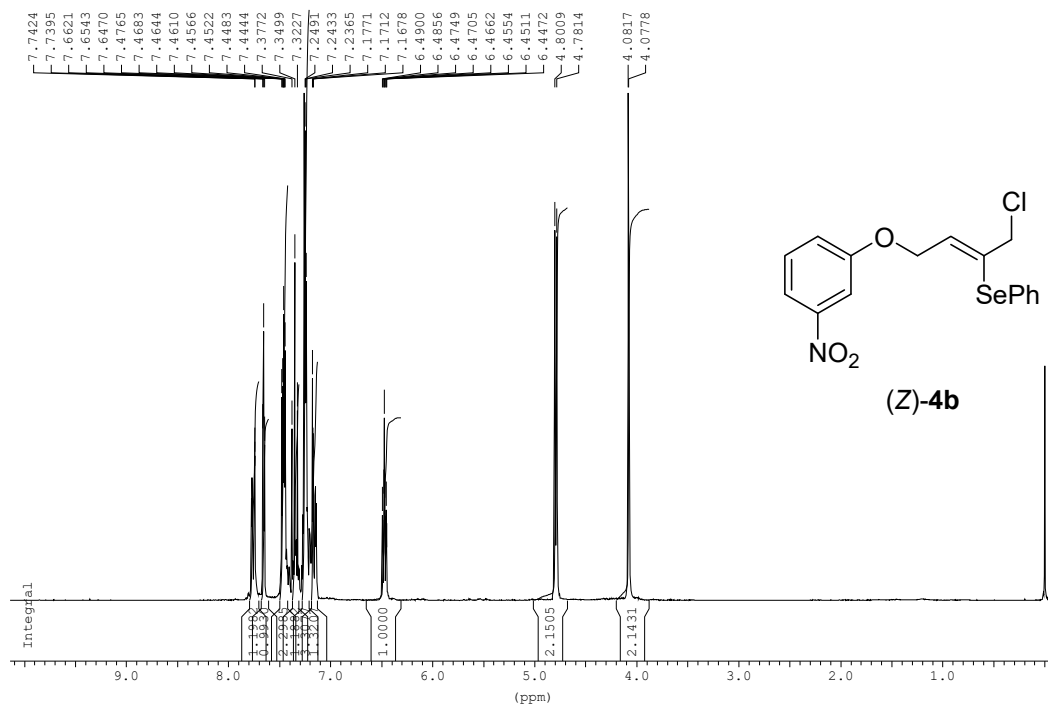

Q09TMGP96B

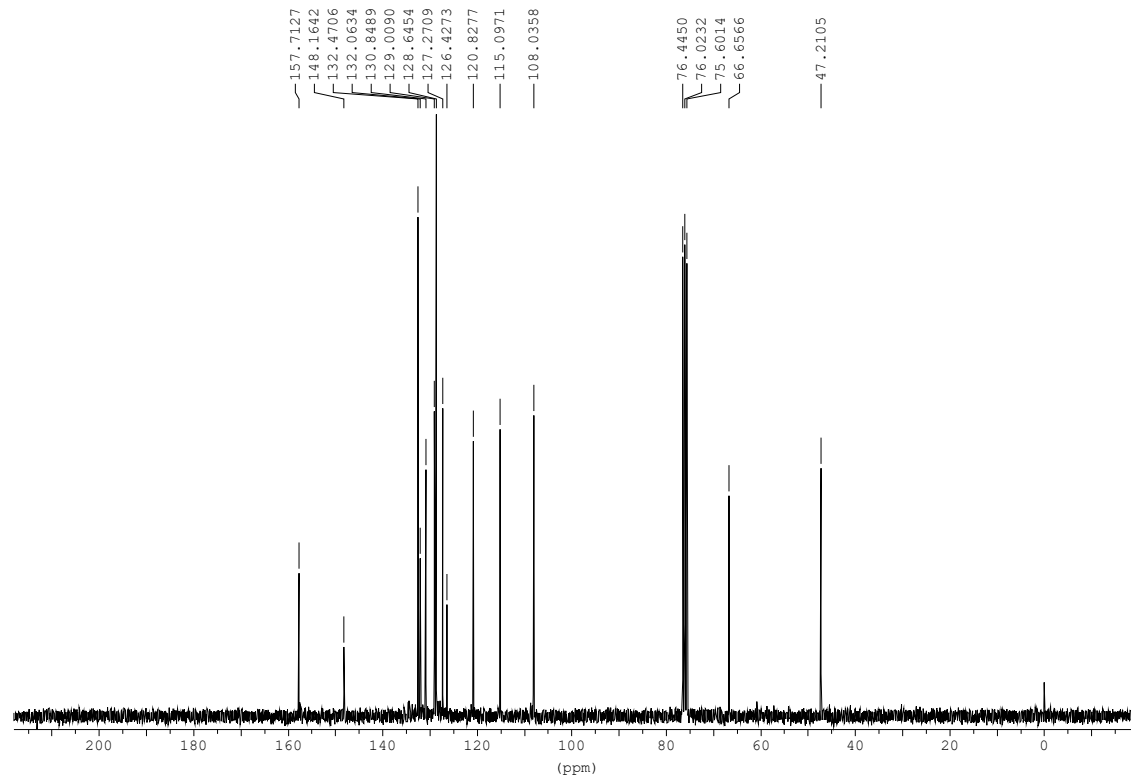

GP96B\_Se  
Q09TMGP96B\_Se

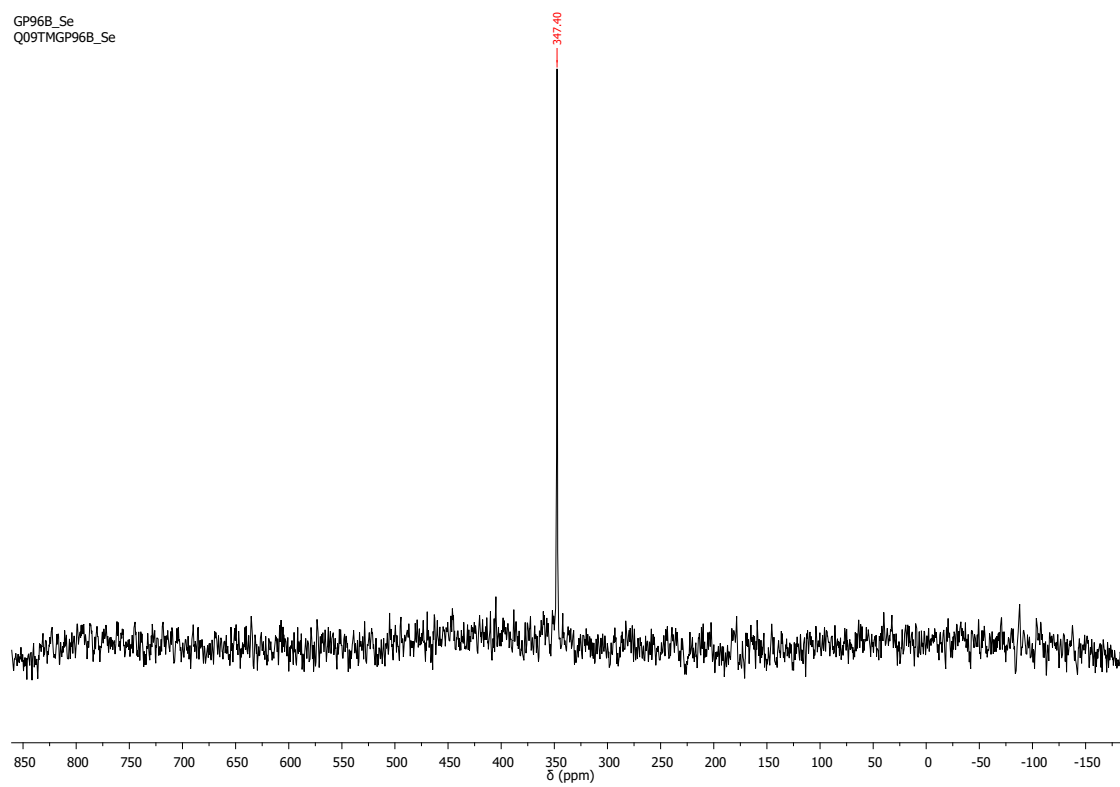



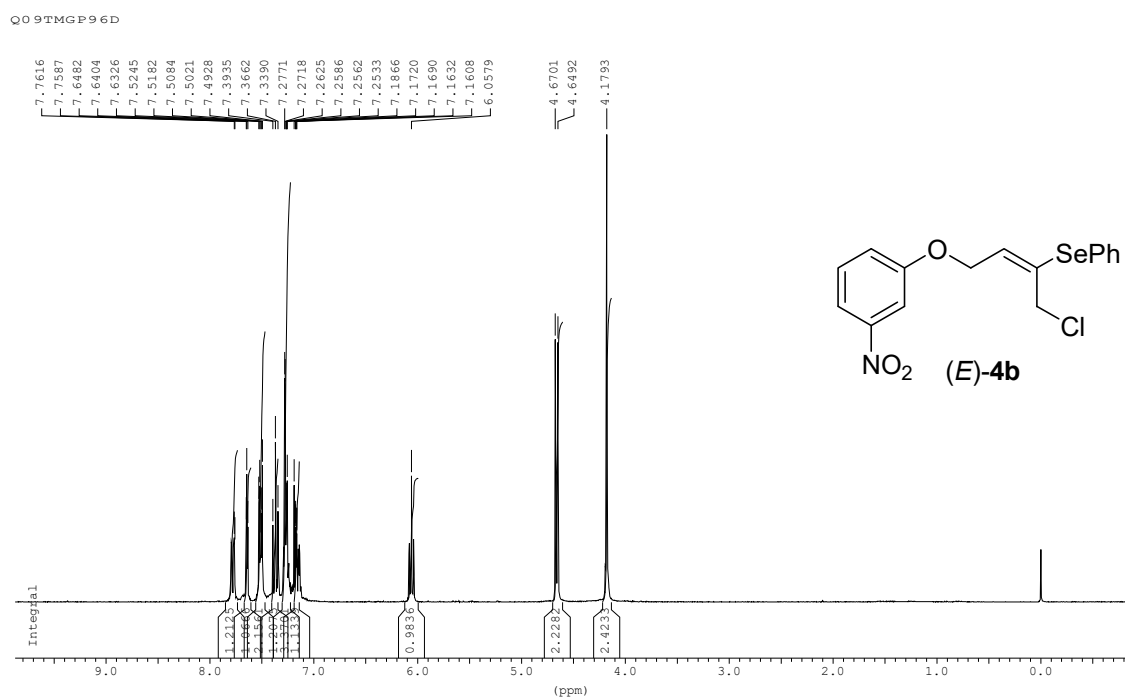

May16-2017-injector  
Q09TMGP96D

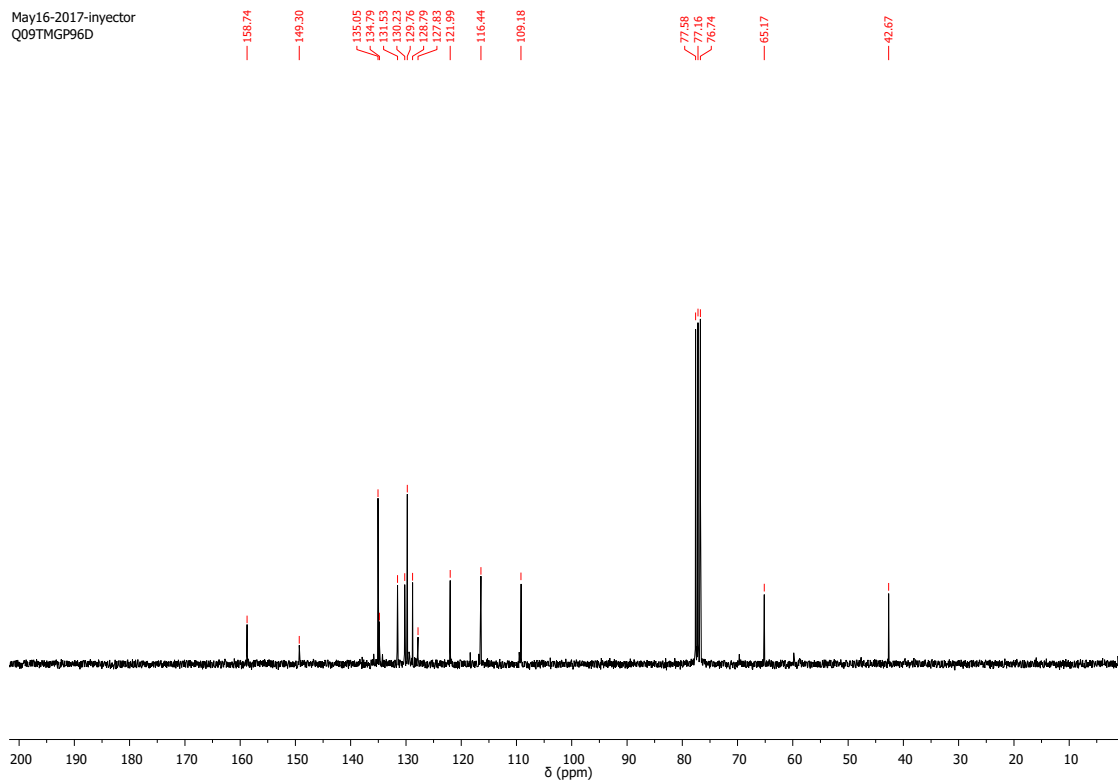

GP96D\_Se  
Q09TMGP96D\_Se

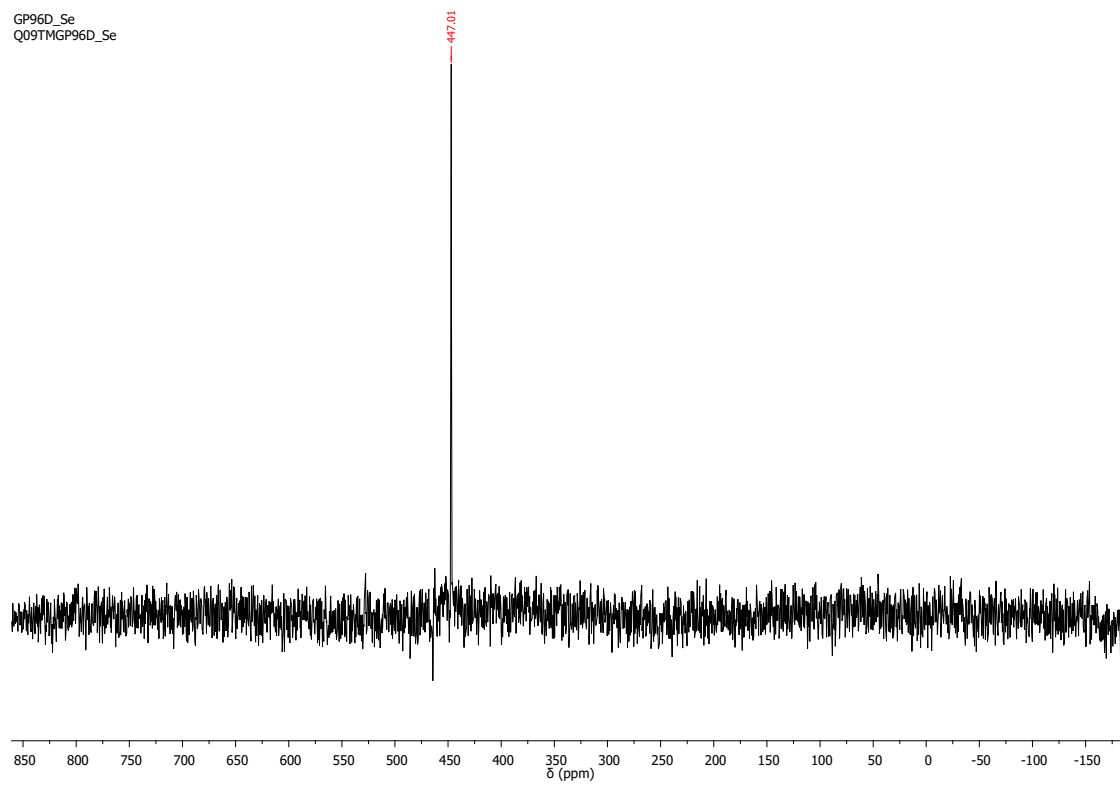

Q09TMGP97B12

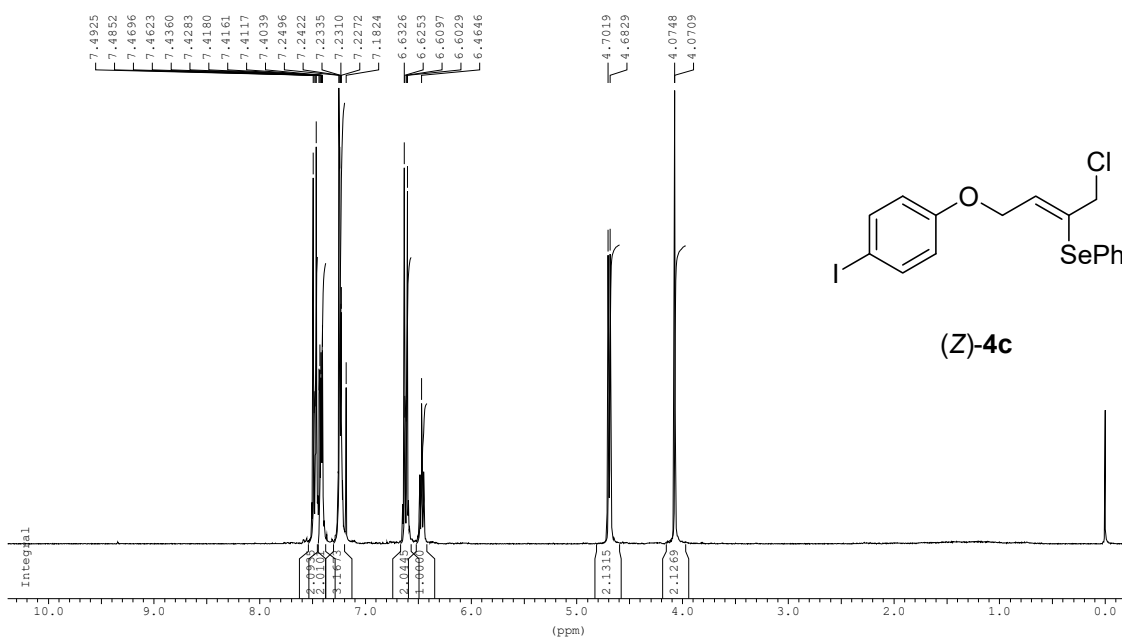May19-2017-injector  
Q09TMGP97B12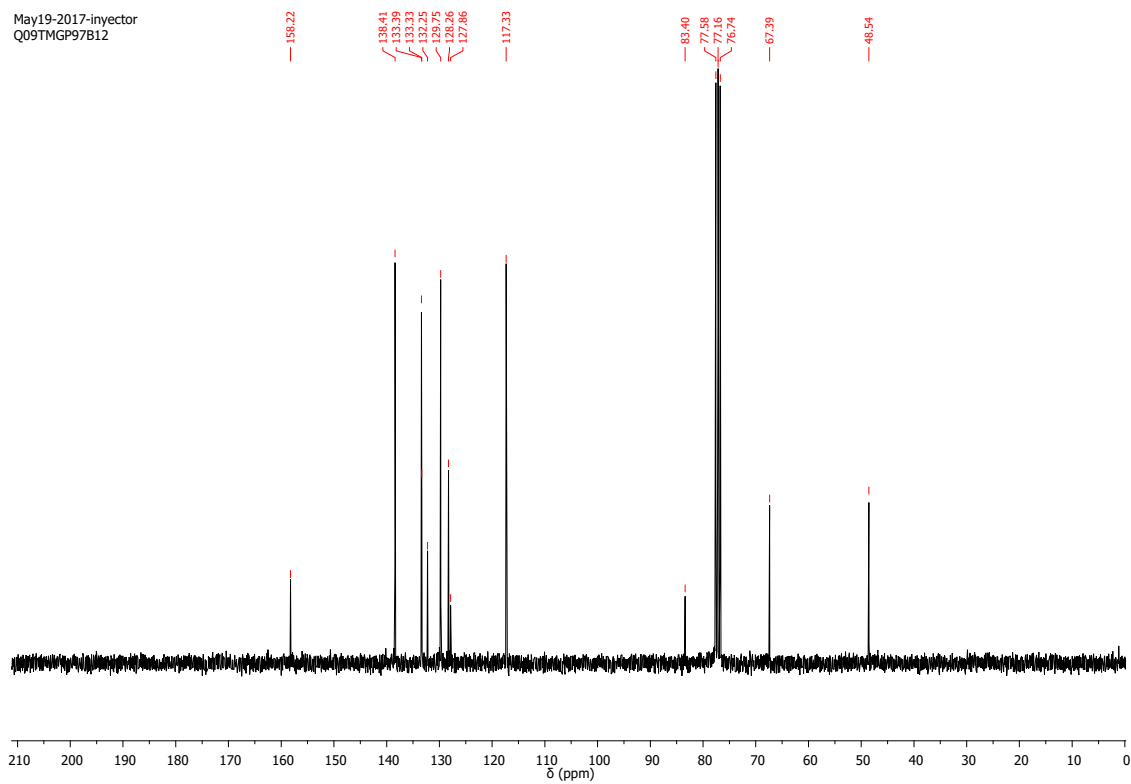

Q09TMGP97B12\_Se  
Q09TMGP97B12\_Se

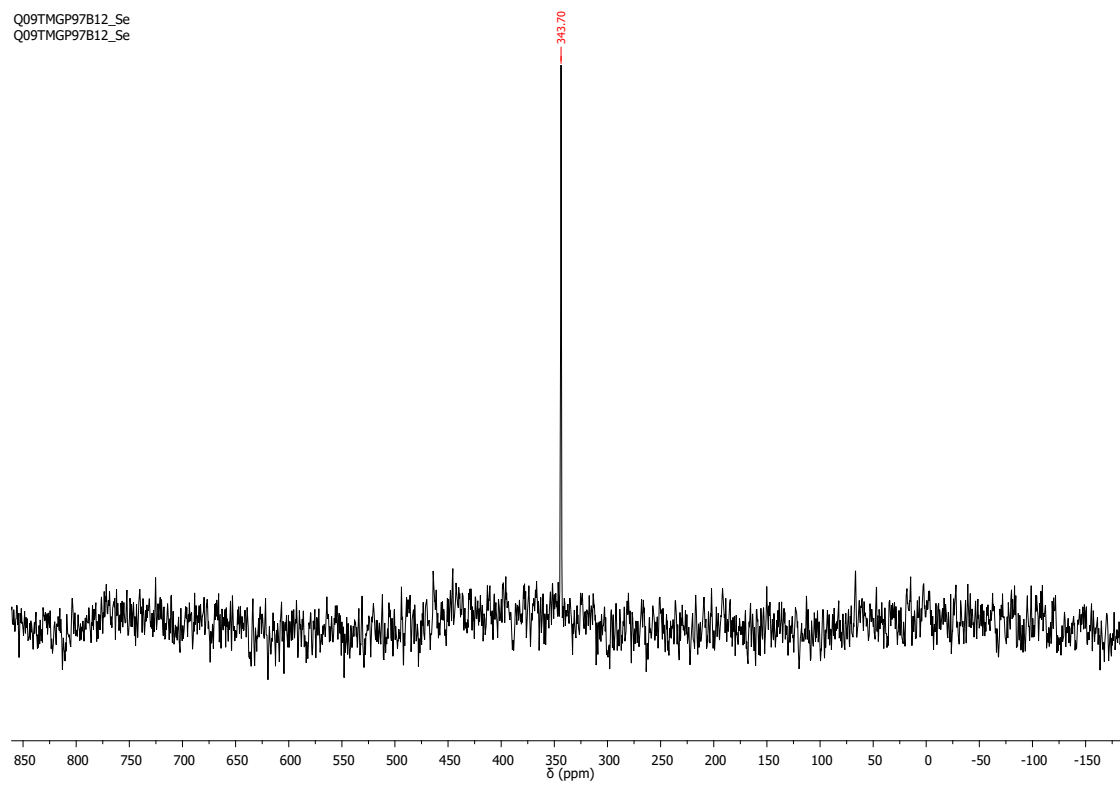

Q09TMGP97B13

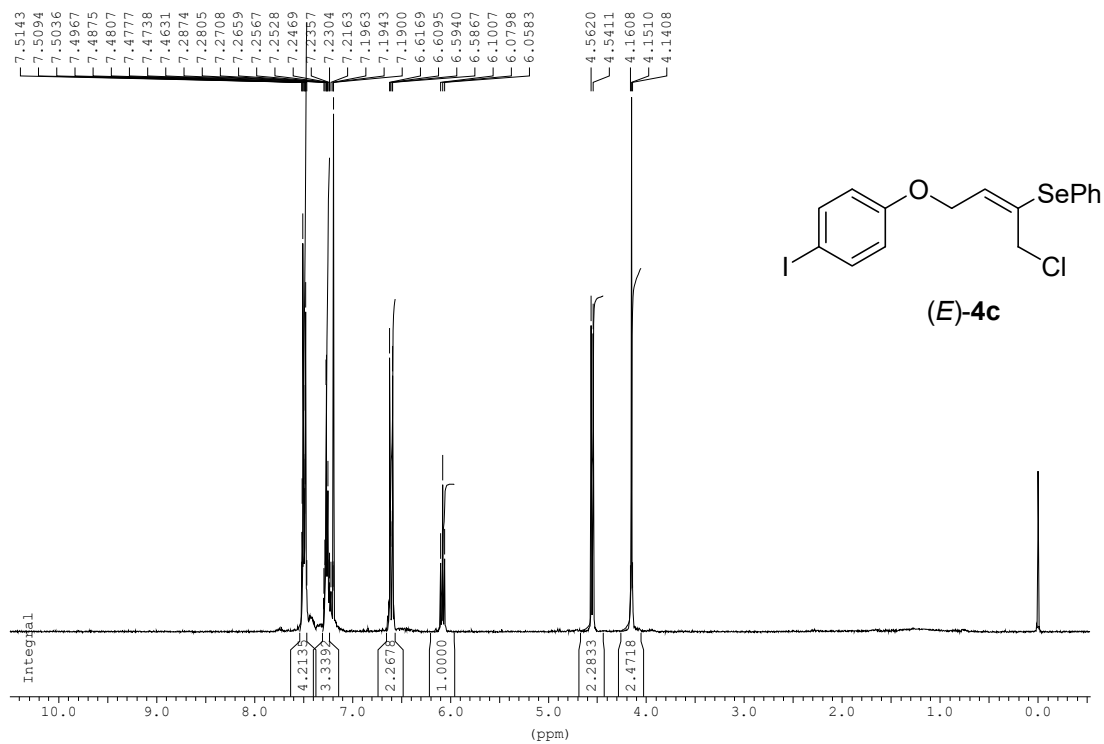May19-2017-injector  
Q09TMGP97B13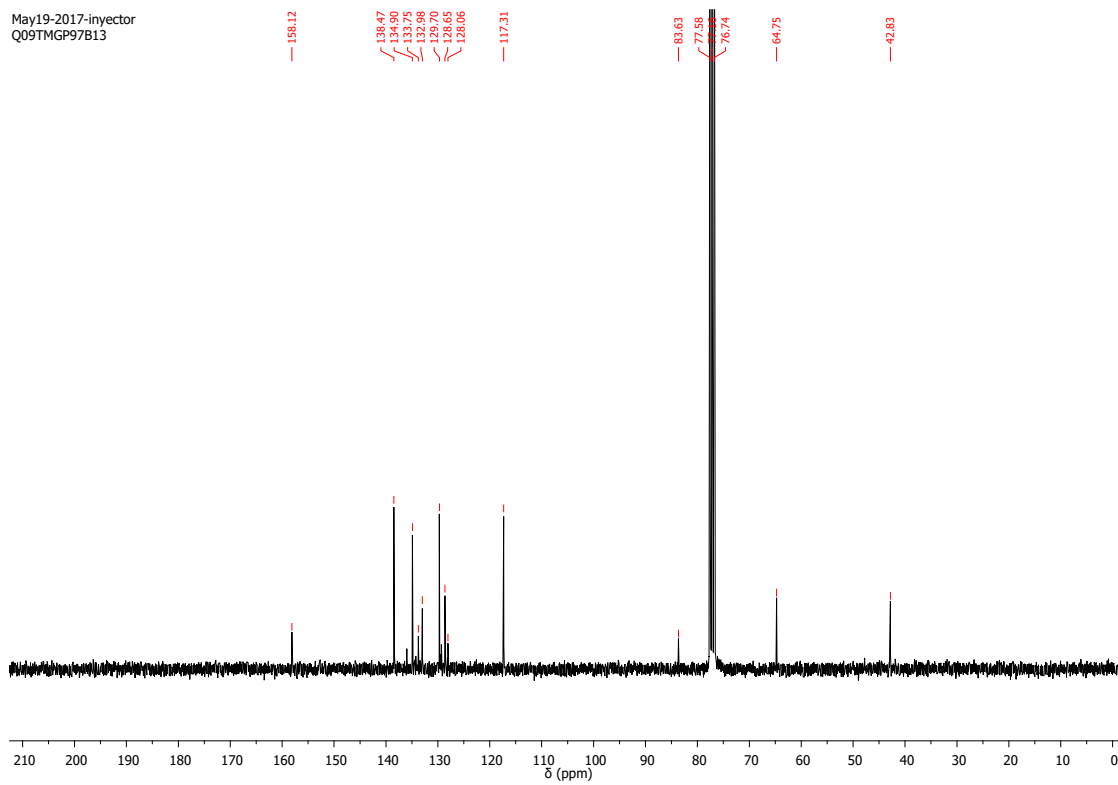

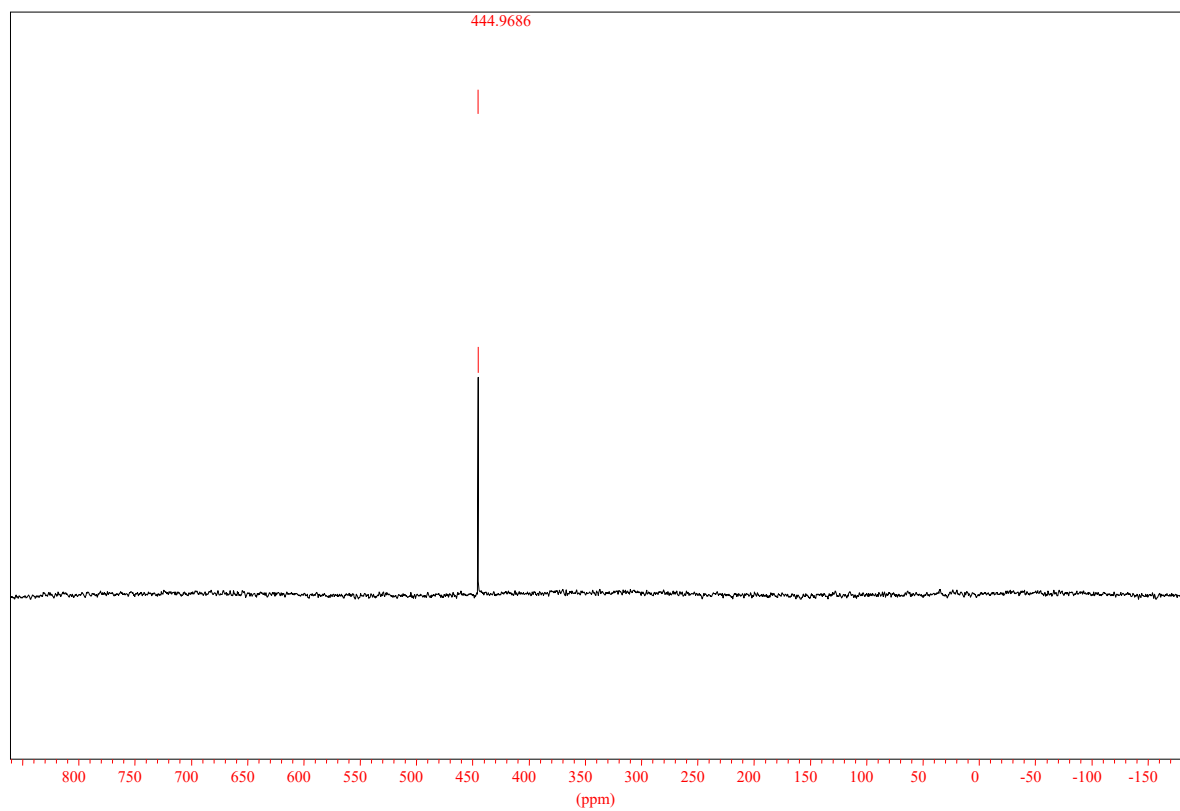

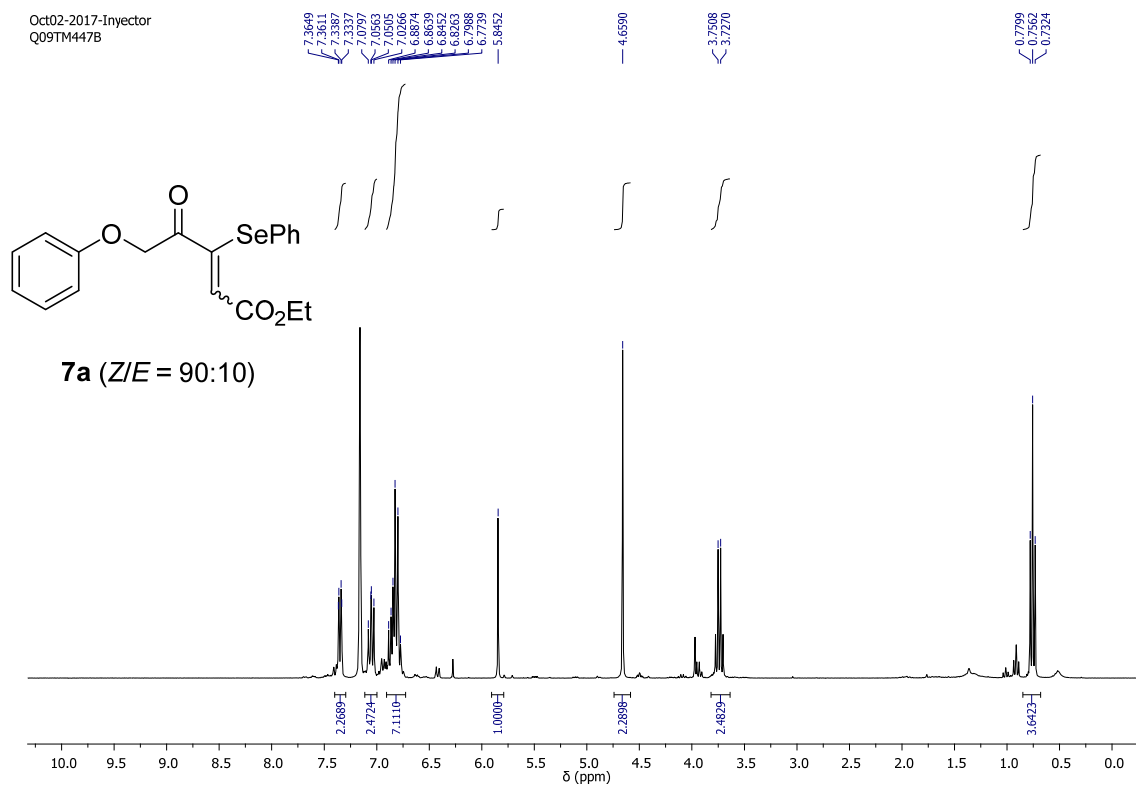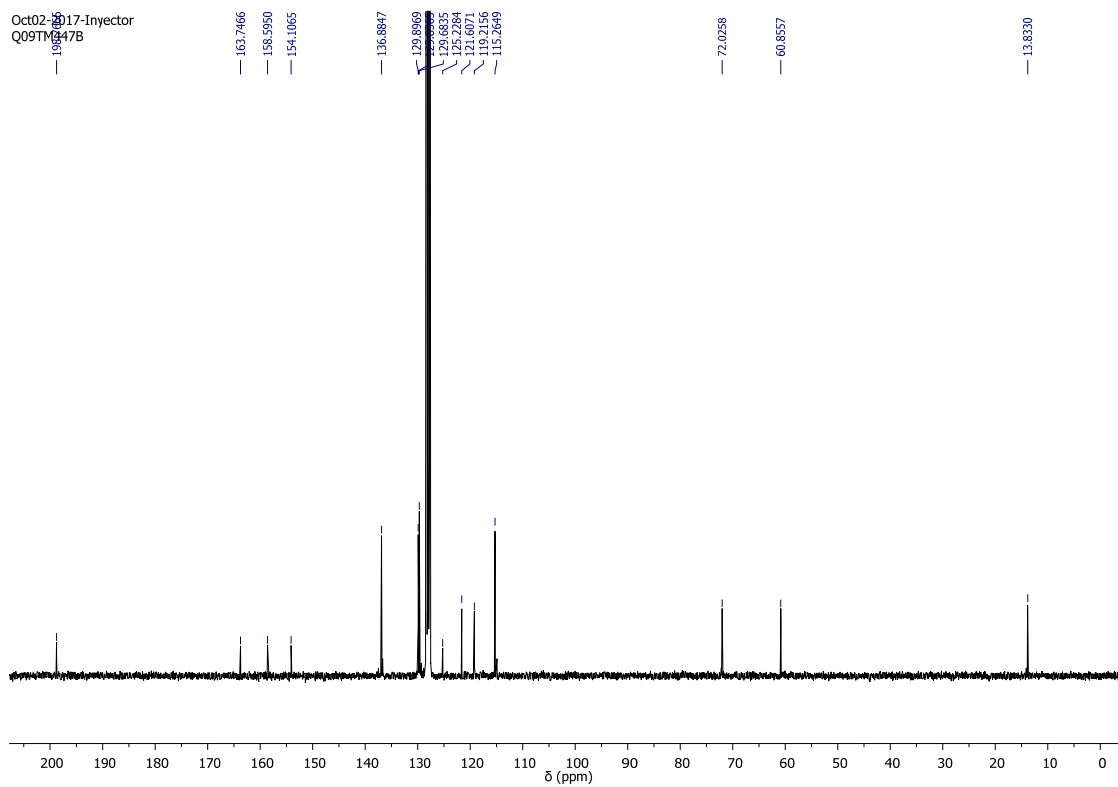

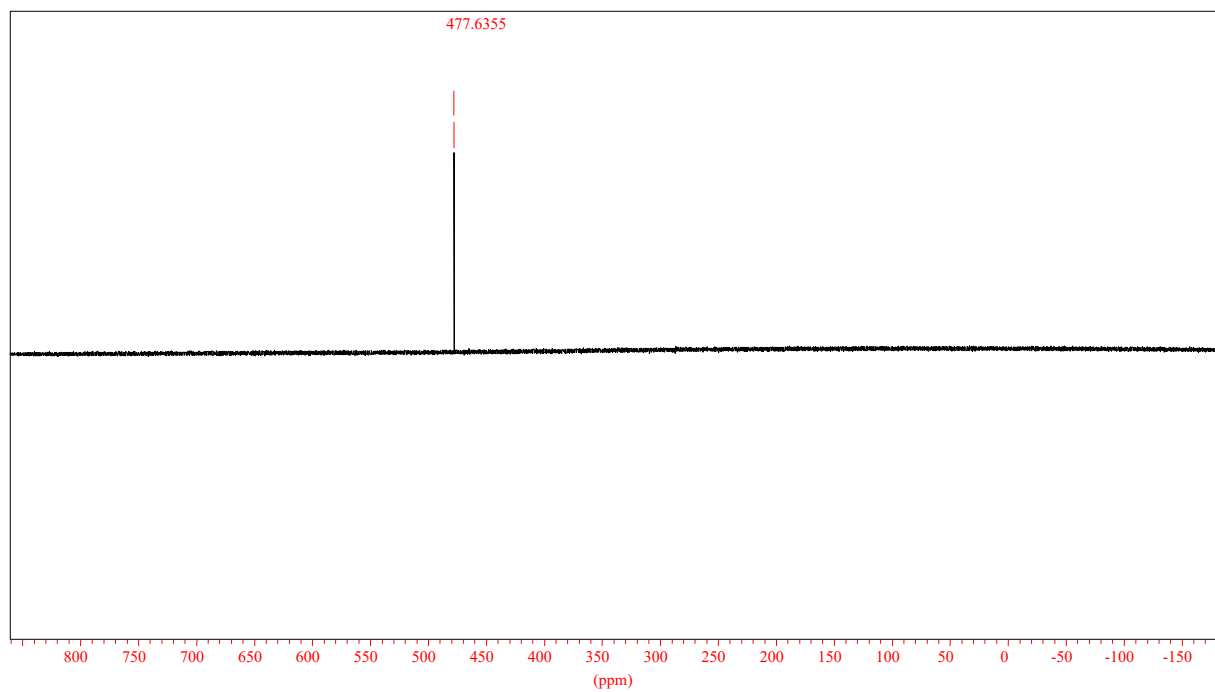



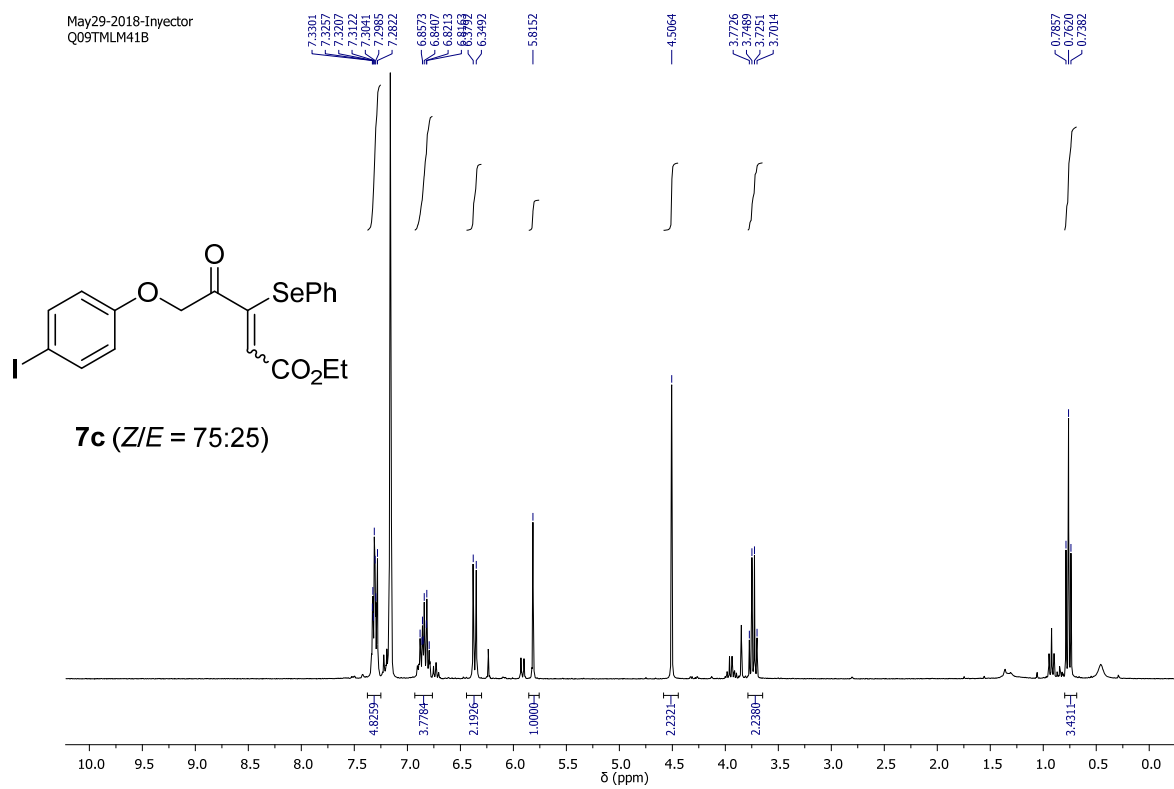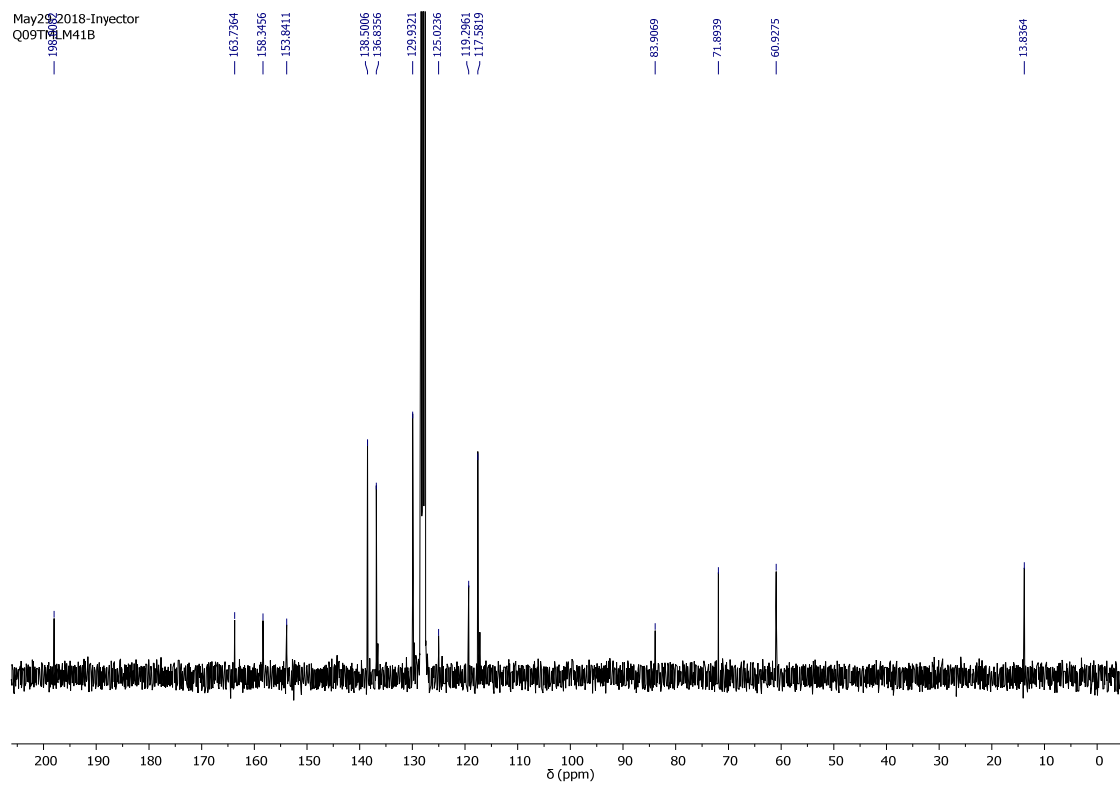

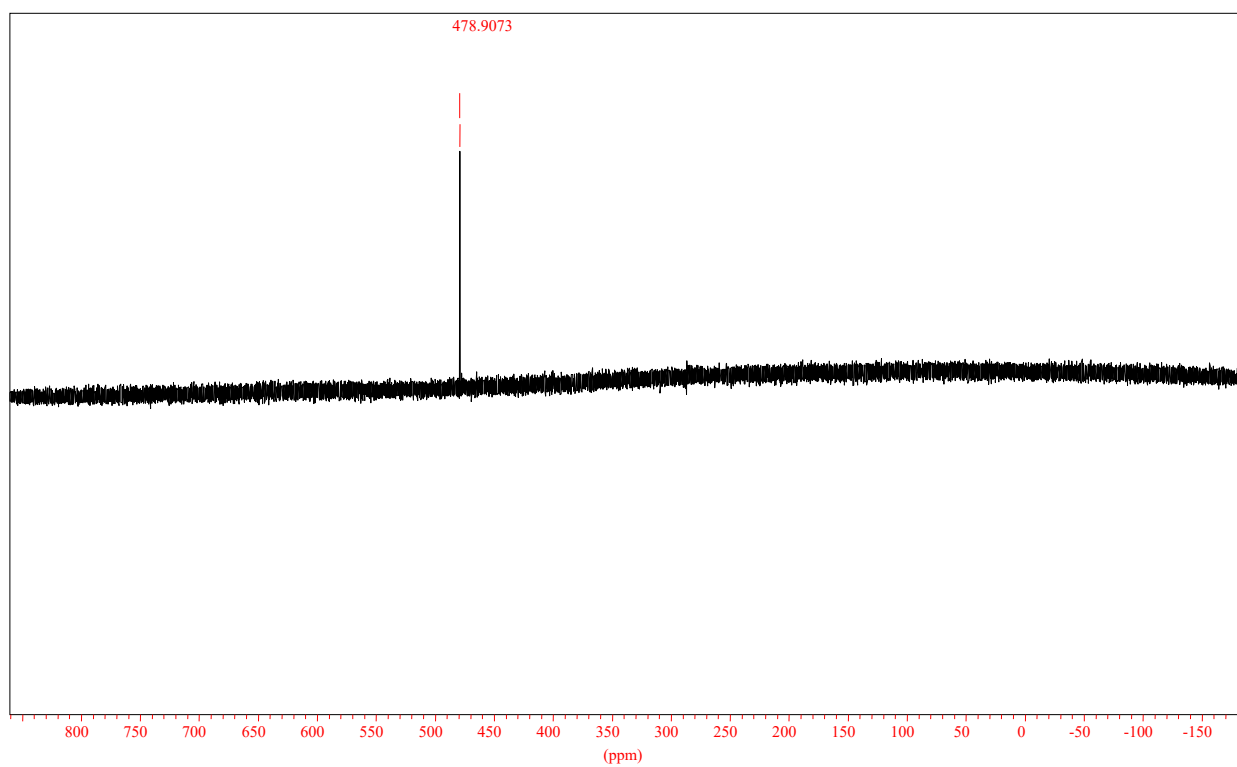

Apr20-2018-Inyector  
Q09TMLM25B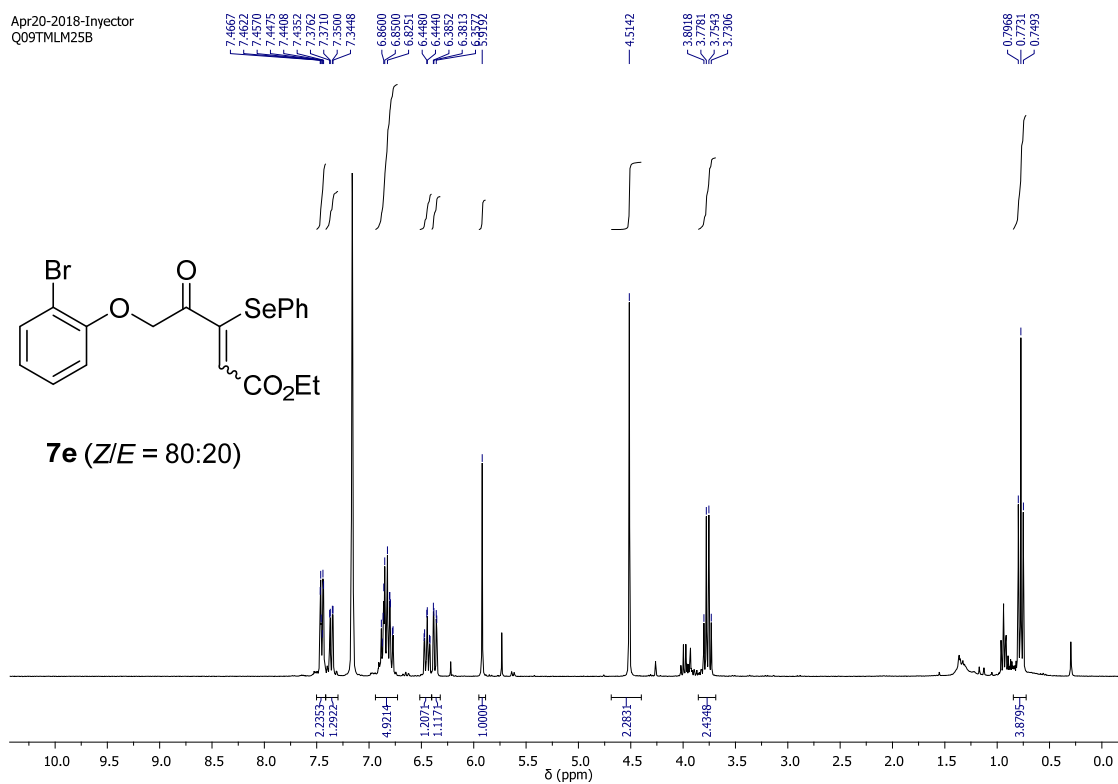Apr20-2018-Inyector  
Q09TMLM25B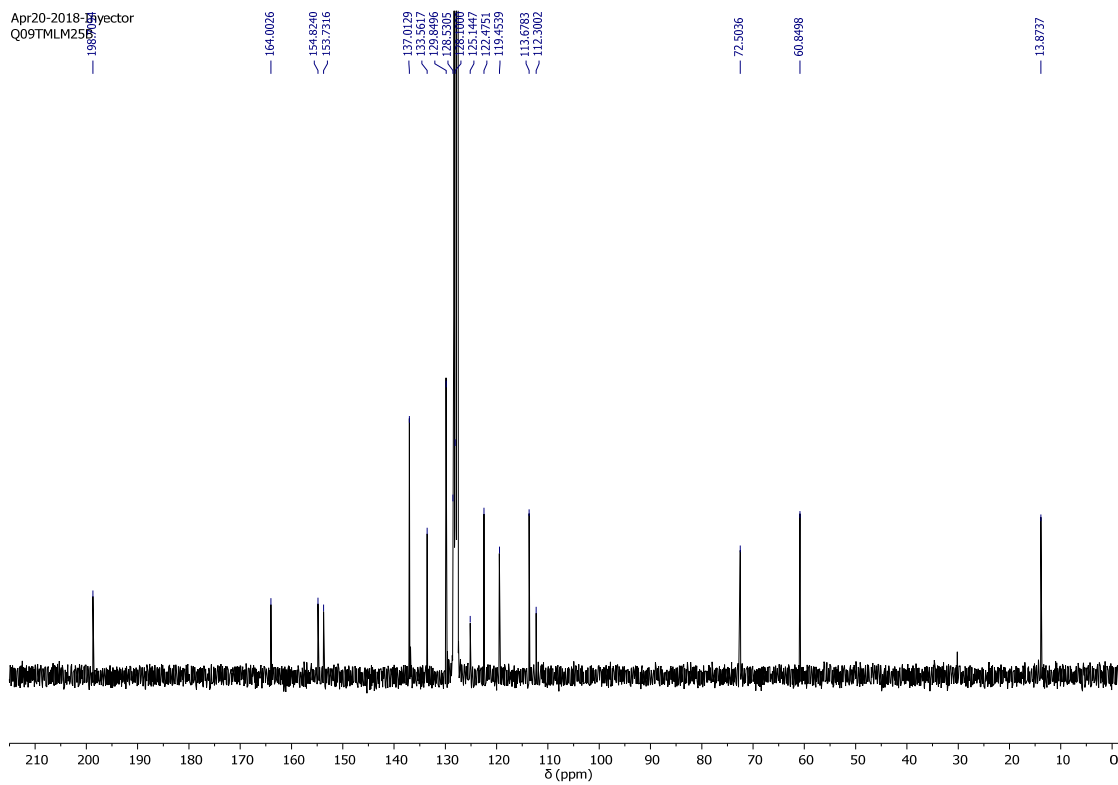

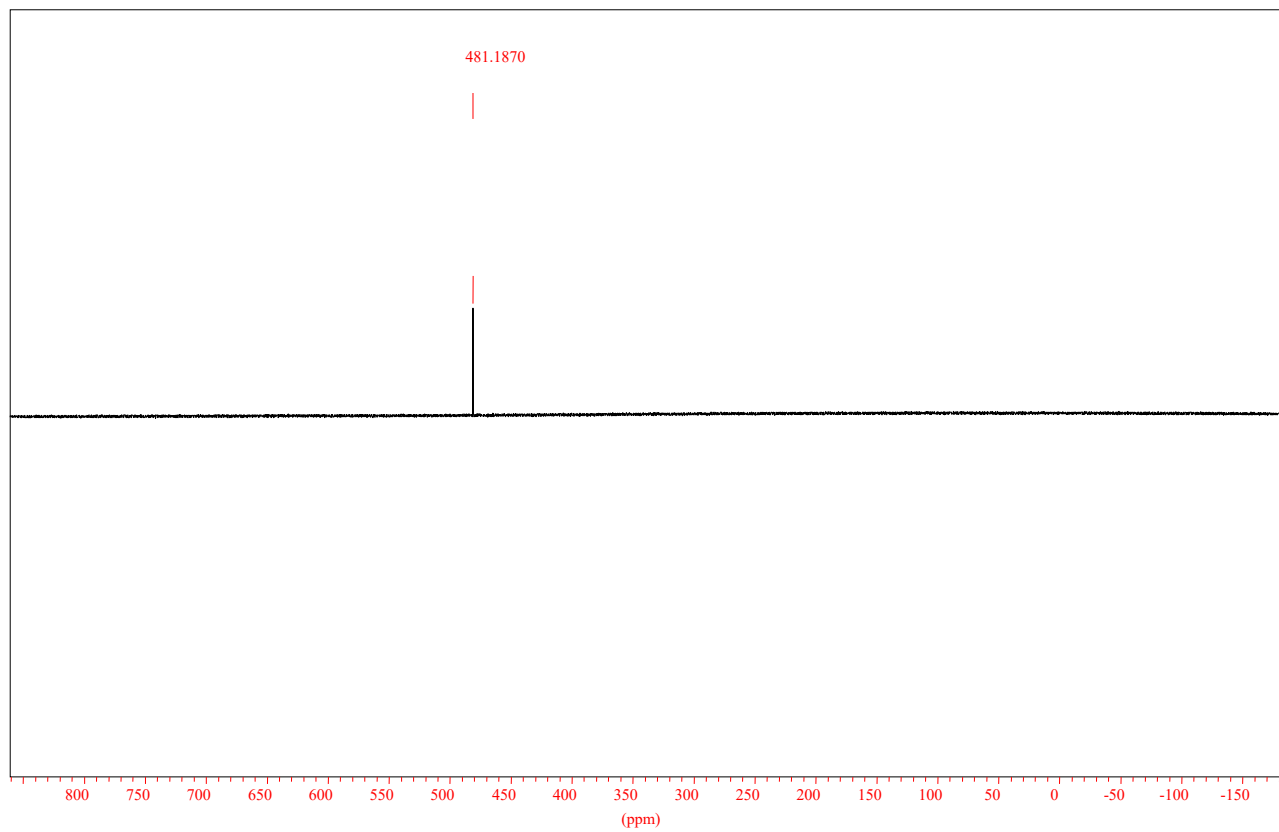

May25-2018-Injector  
Q09TMLM39B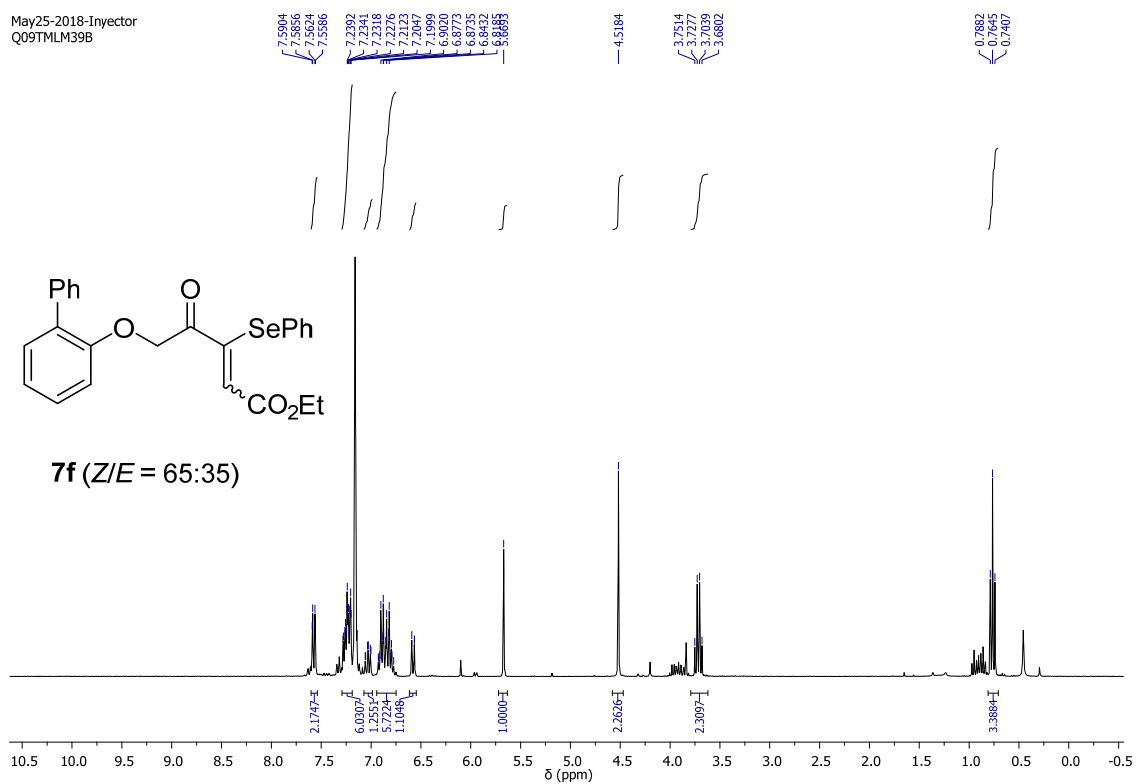May25-2018-Injector  
Q09TMLM39B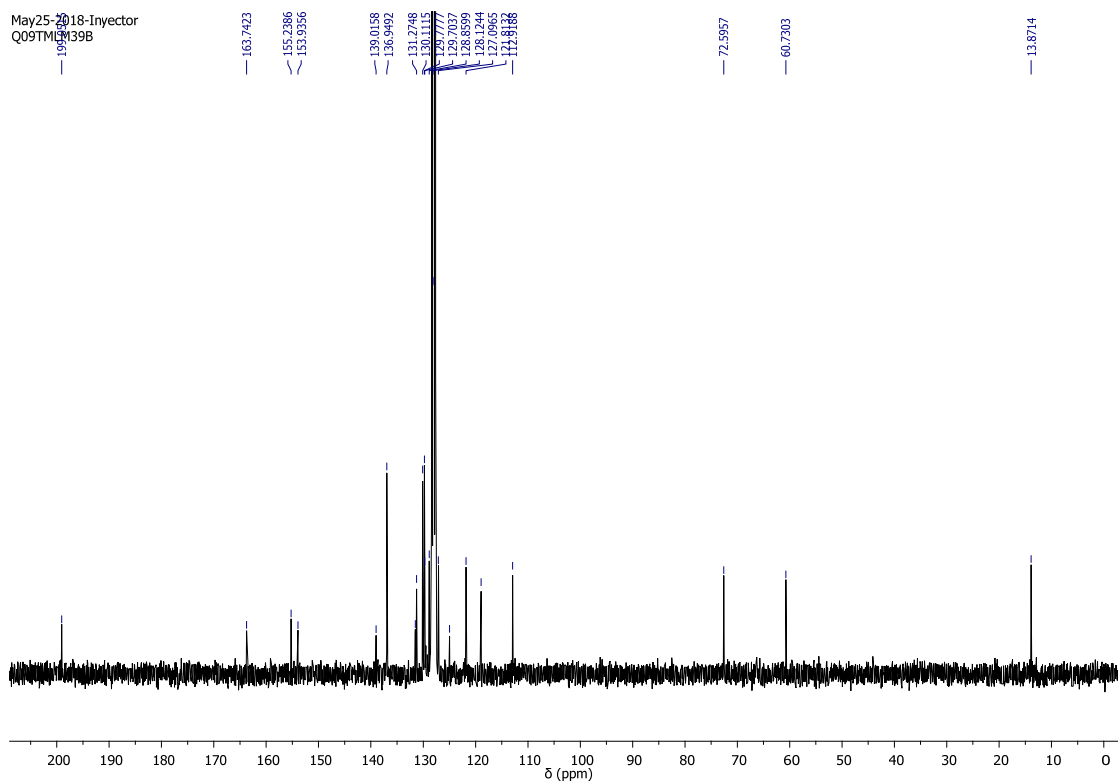

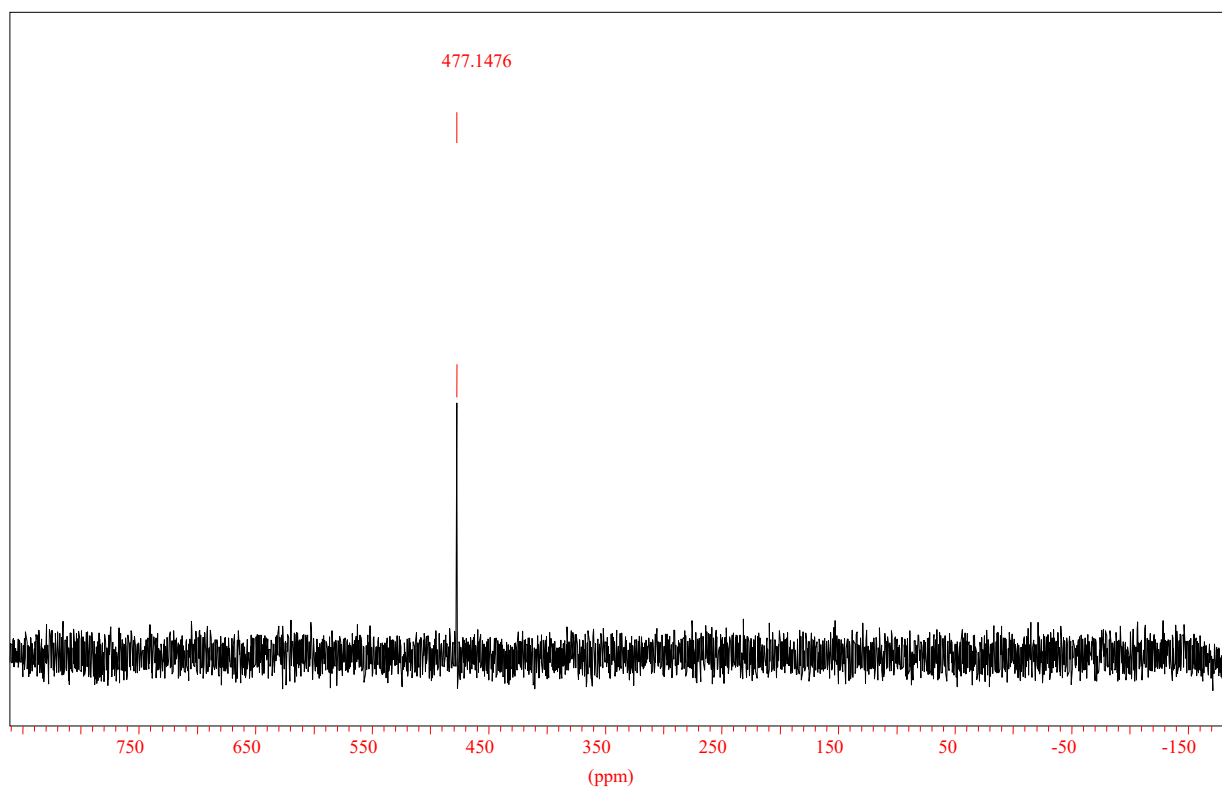

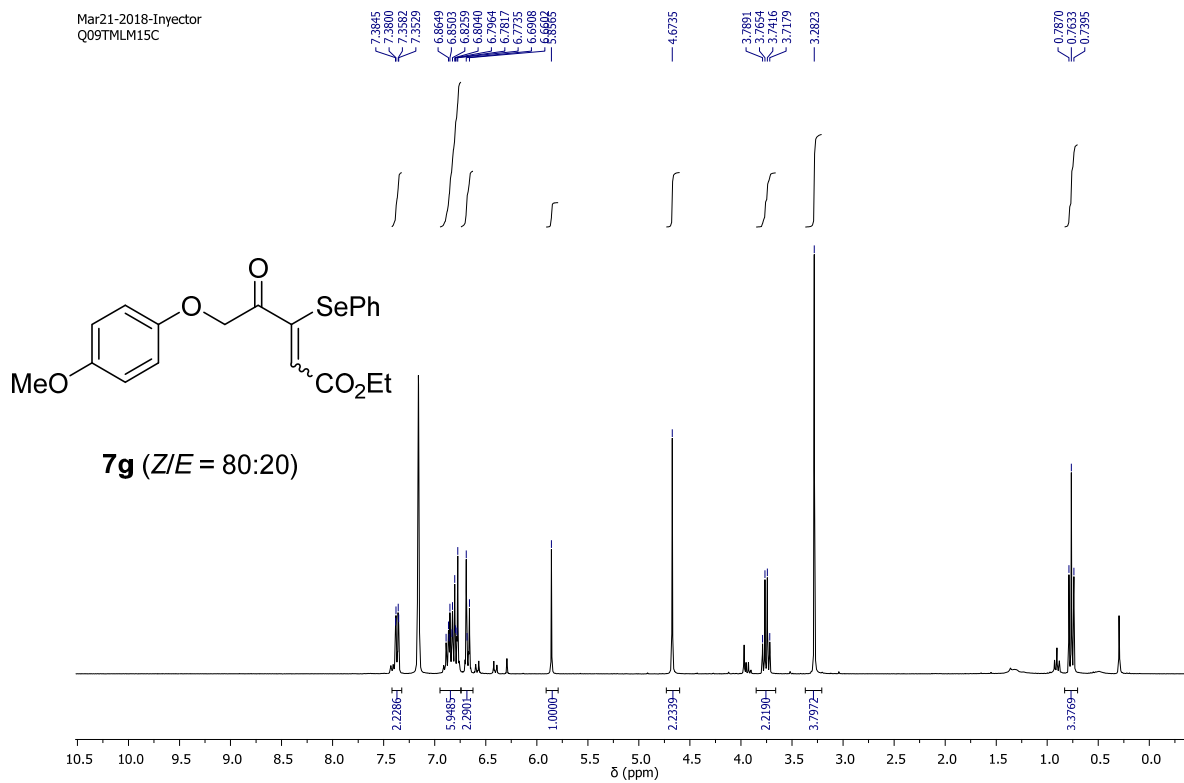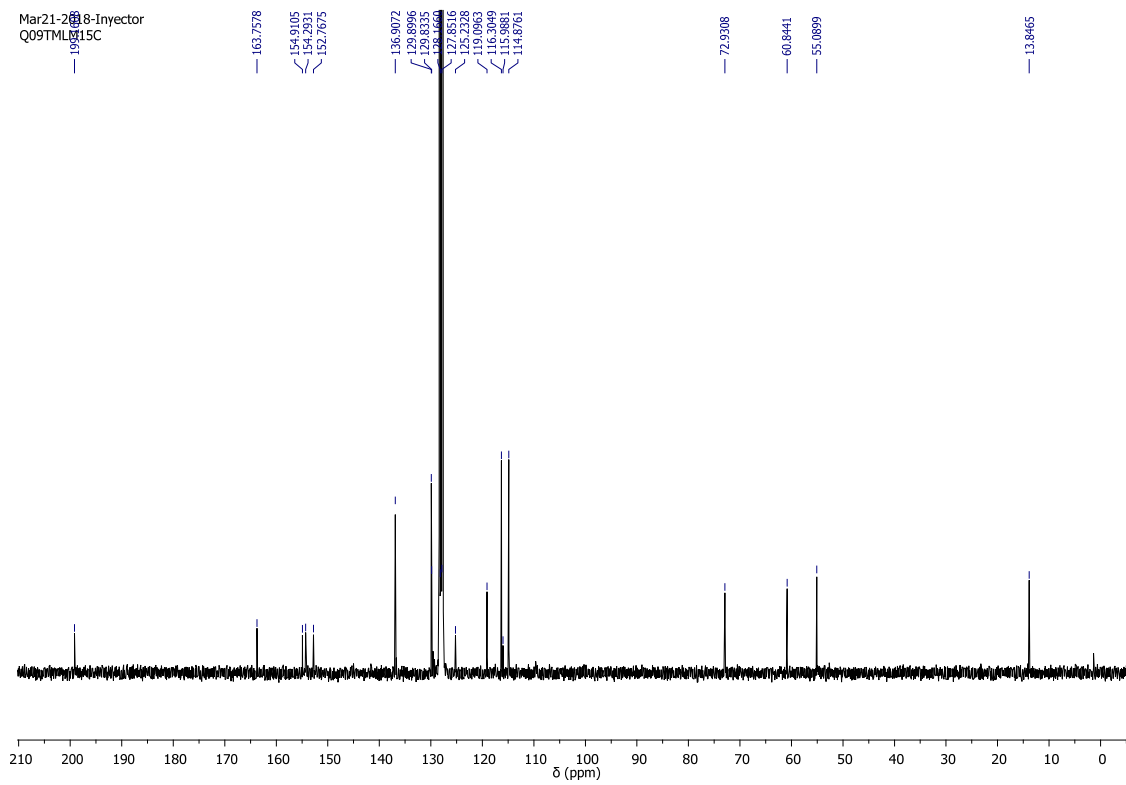

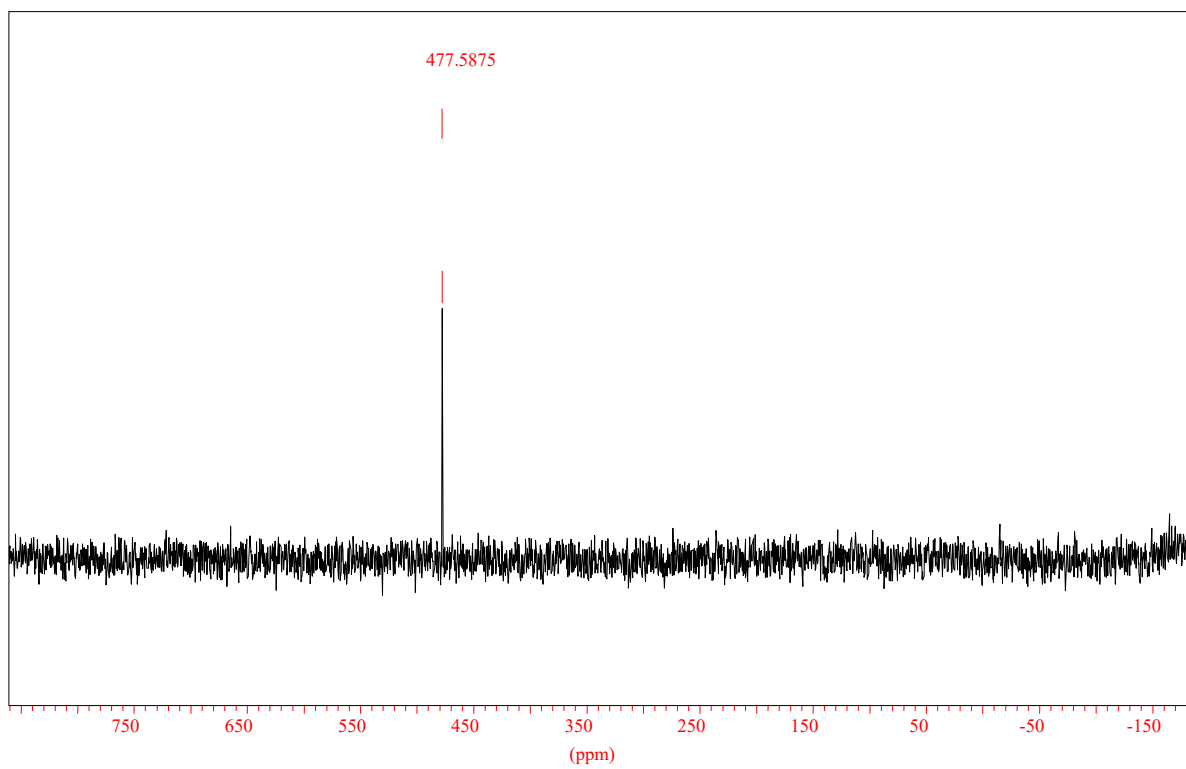



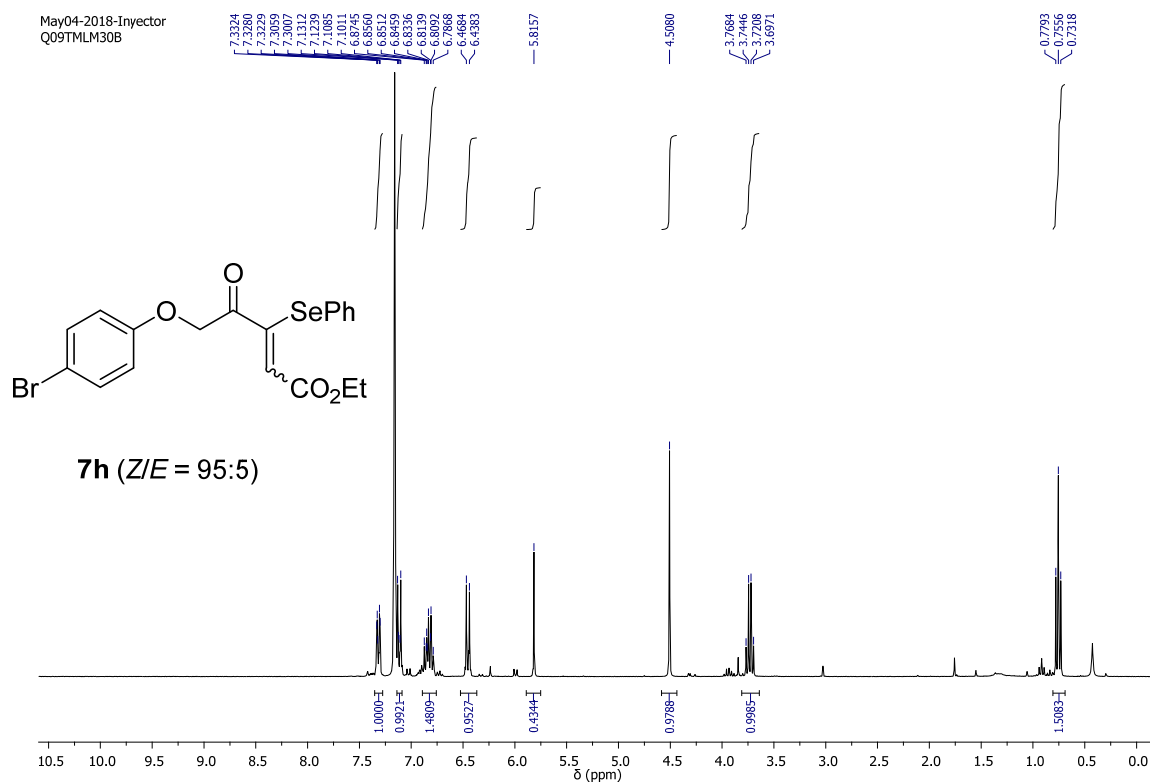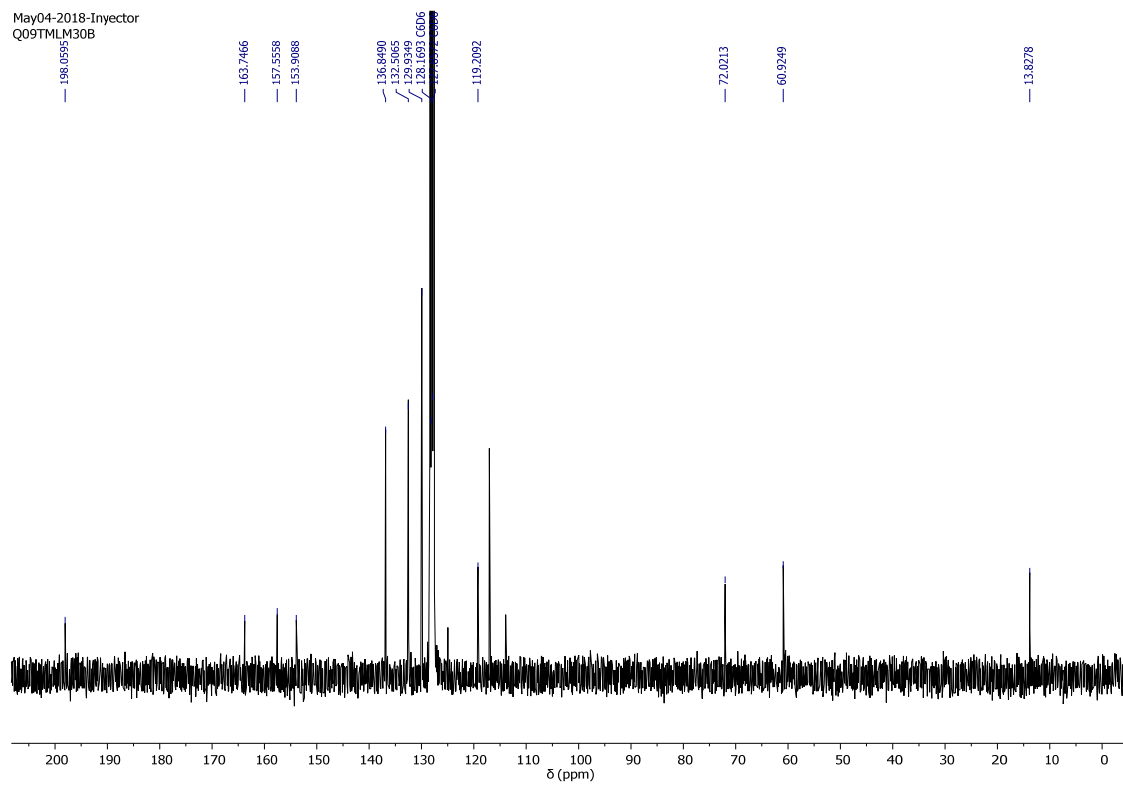

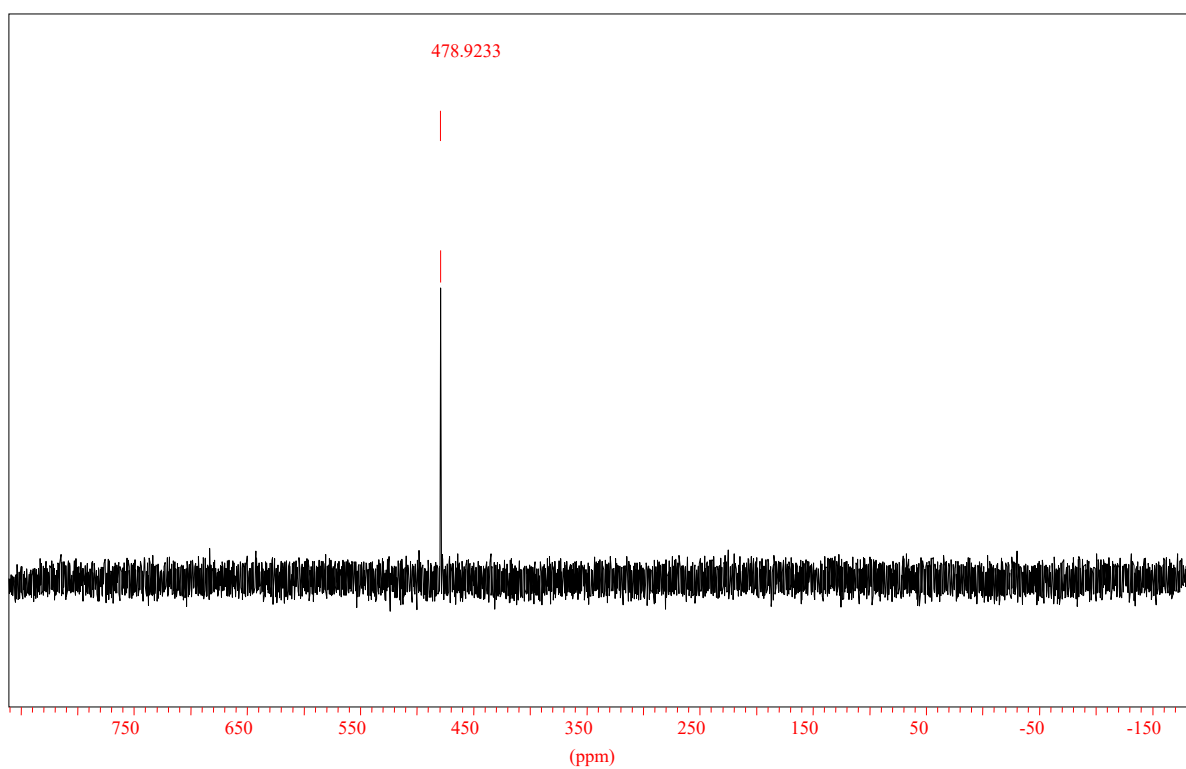

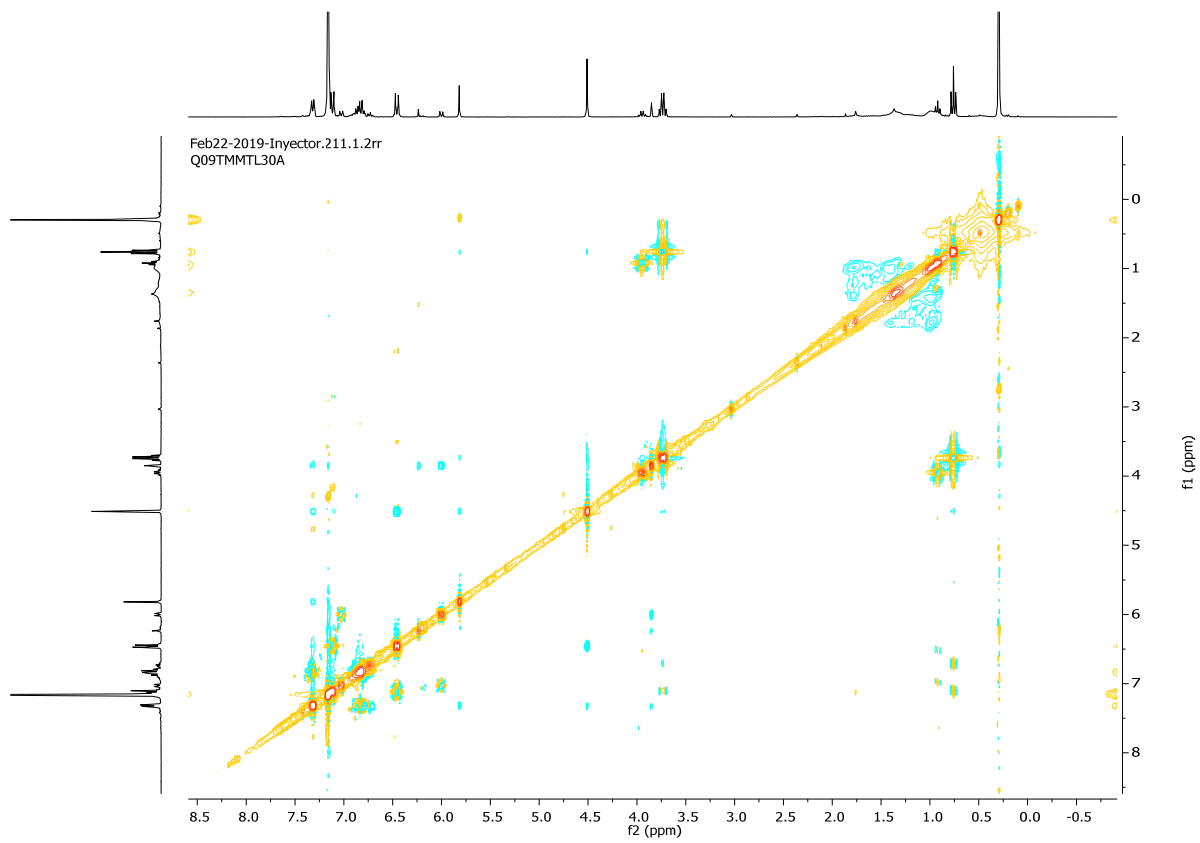

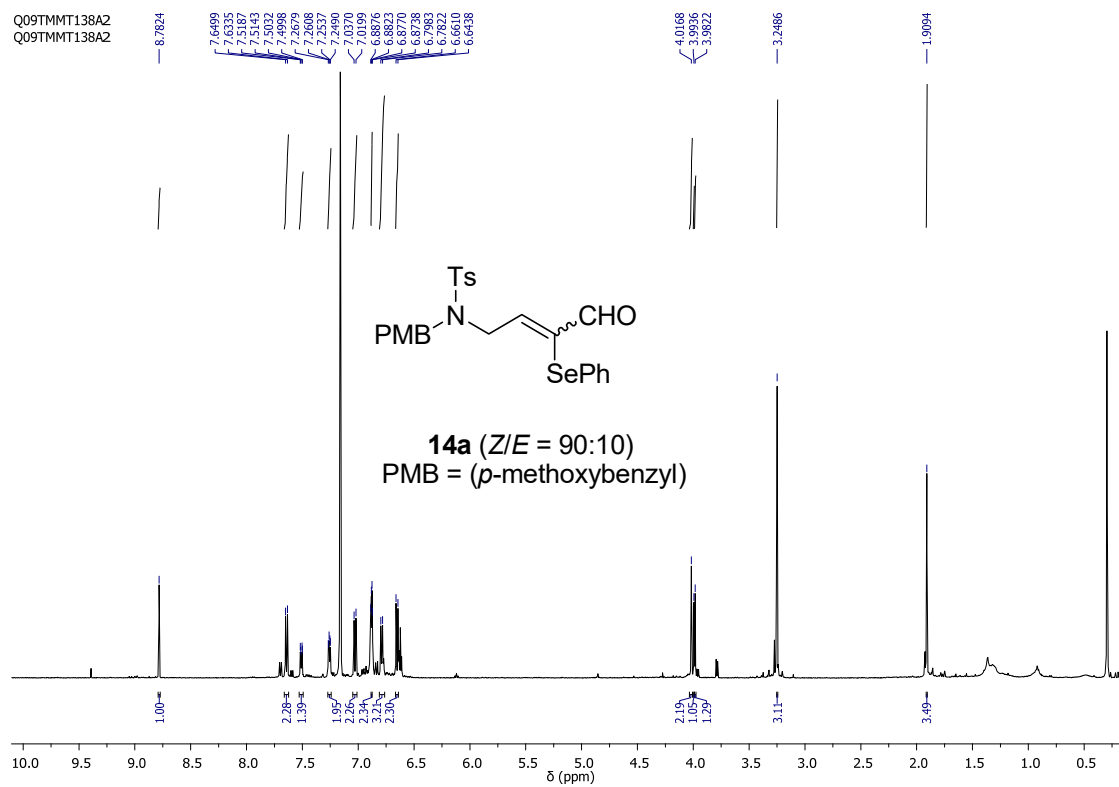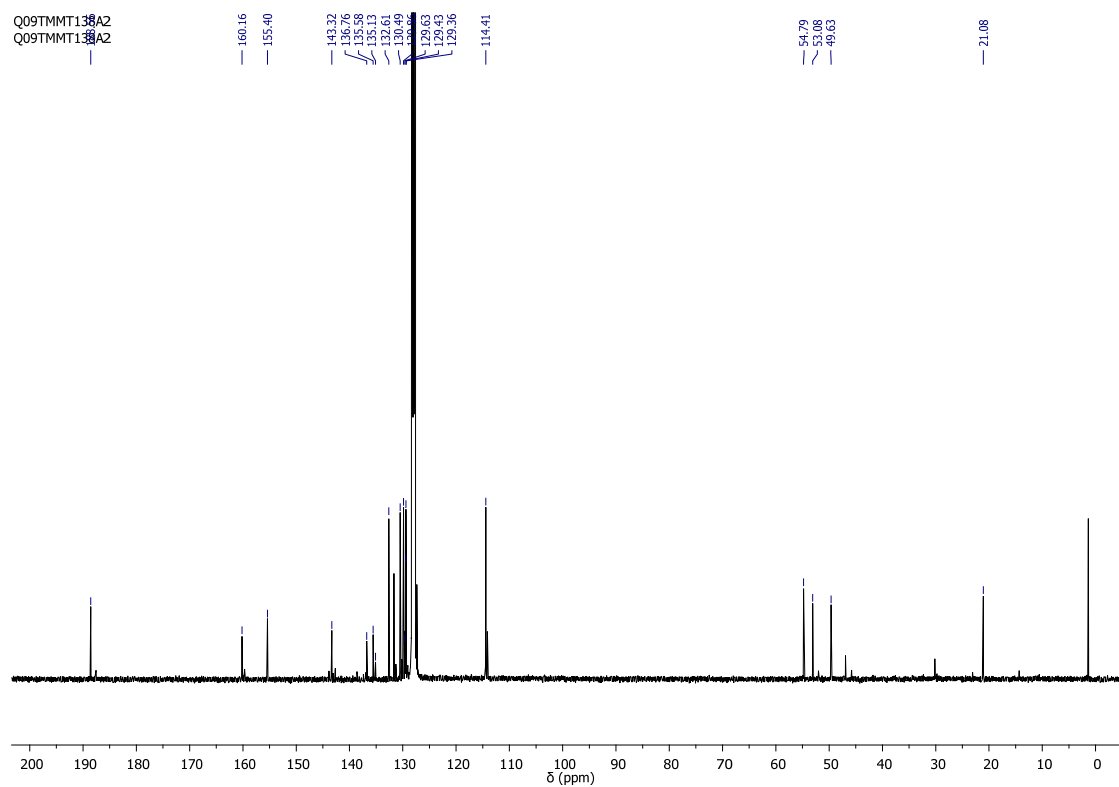

Q09TMMT138A2  
Q09TMMT138A2 77Se sin filtro

270.96

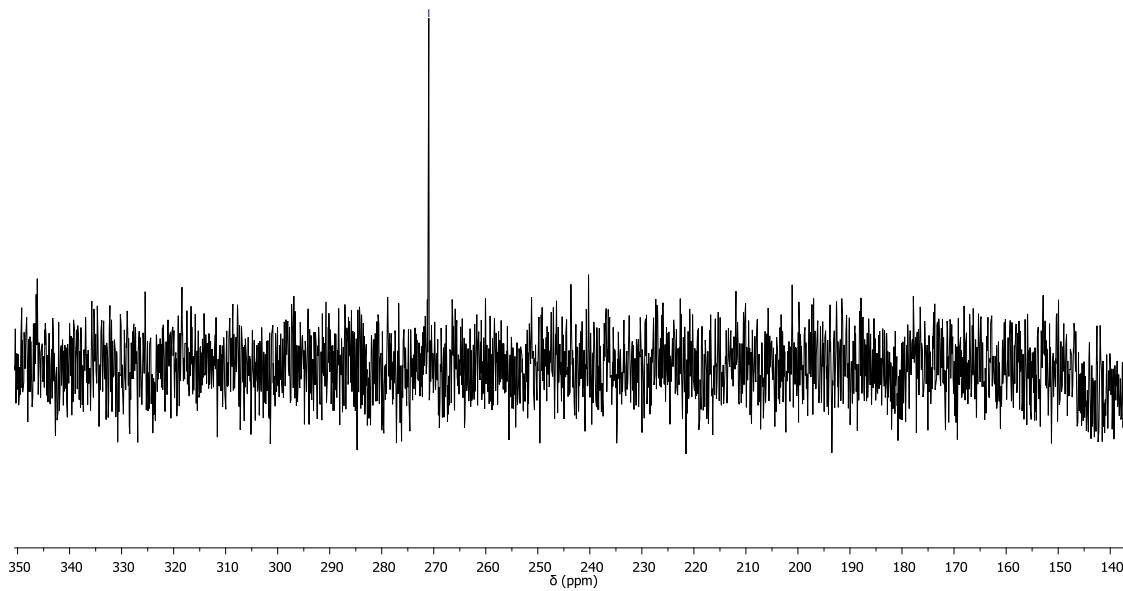

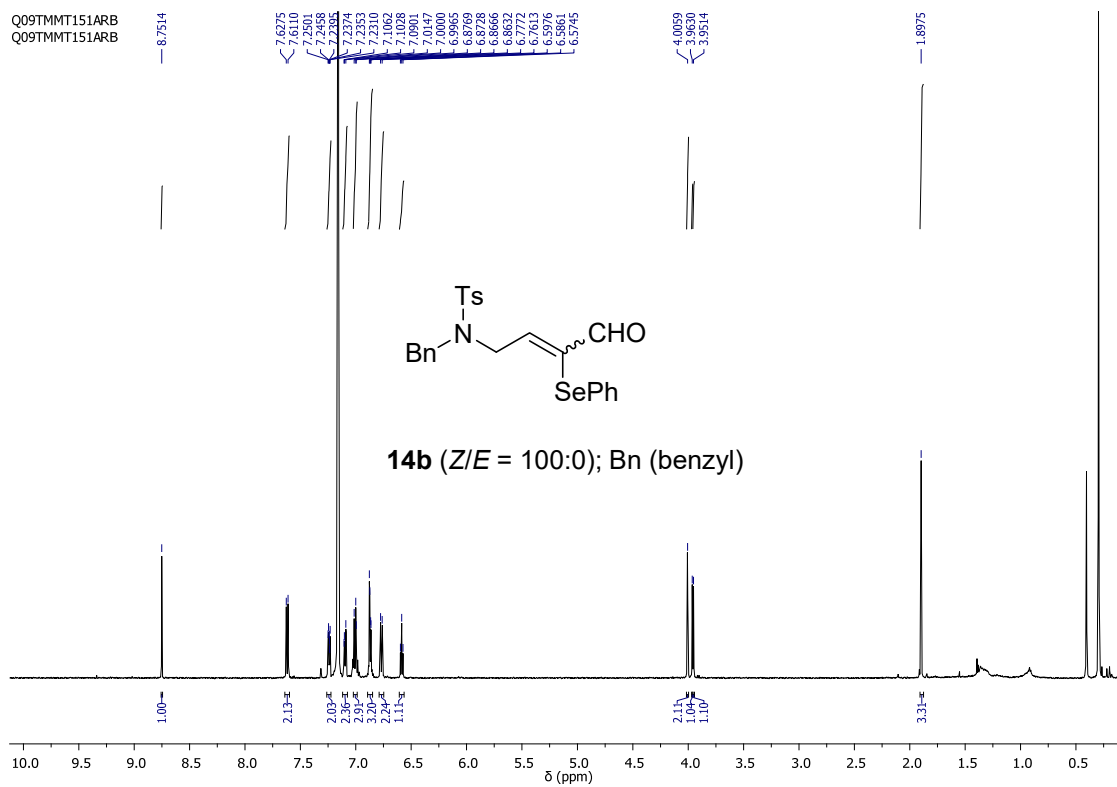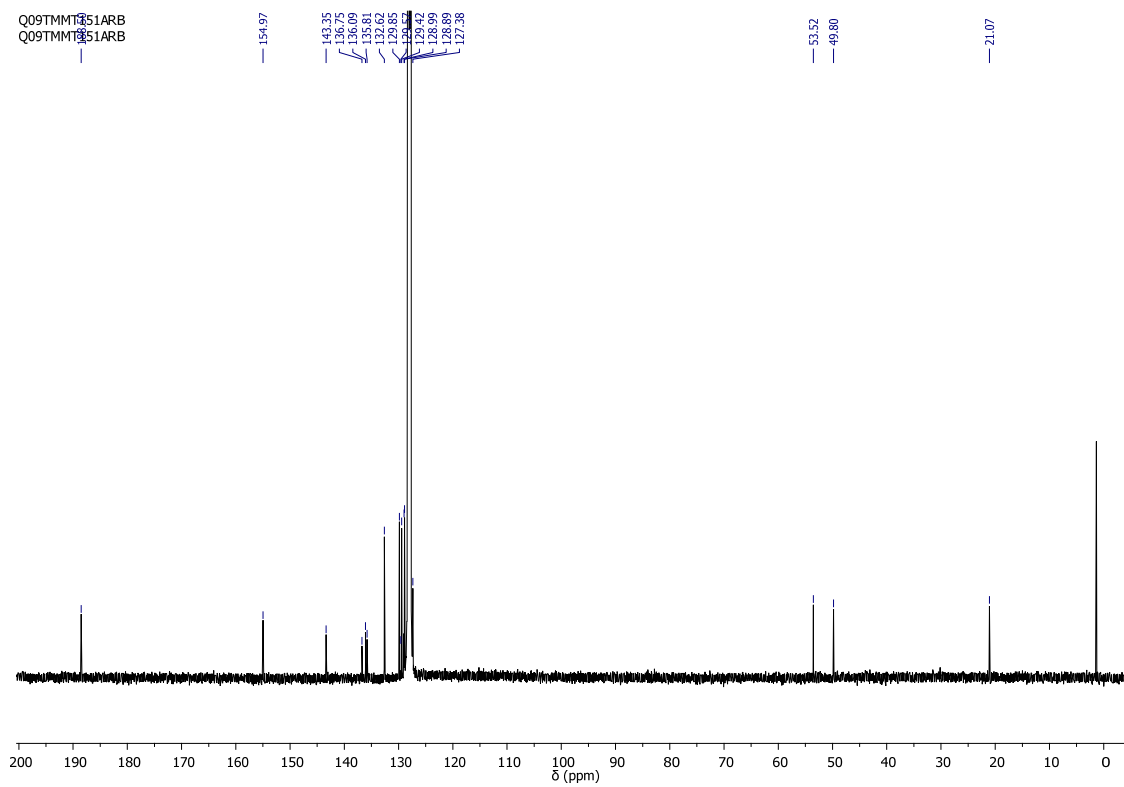

Q09TM151ARB2.7.1.1r  
Q09TM151ARB2 77Se sin filtro

— 271.28

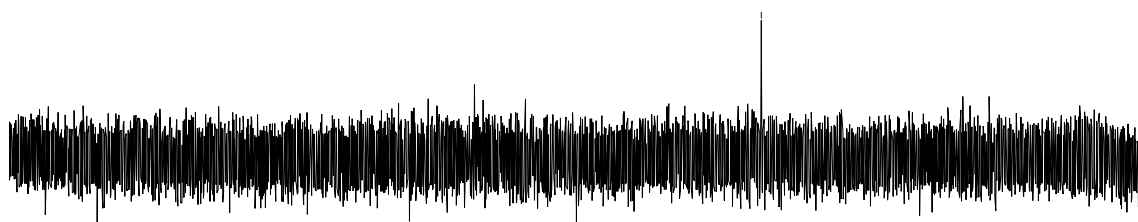

530 520 510 500 490 480 470 460 450 440 430 420 410 400 390 380 370 360 350 340 330 320 310 300 290 280 270 260 250 240 230 220 210 200 190 180 170 160 150 140  
f1 (ppm)

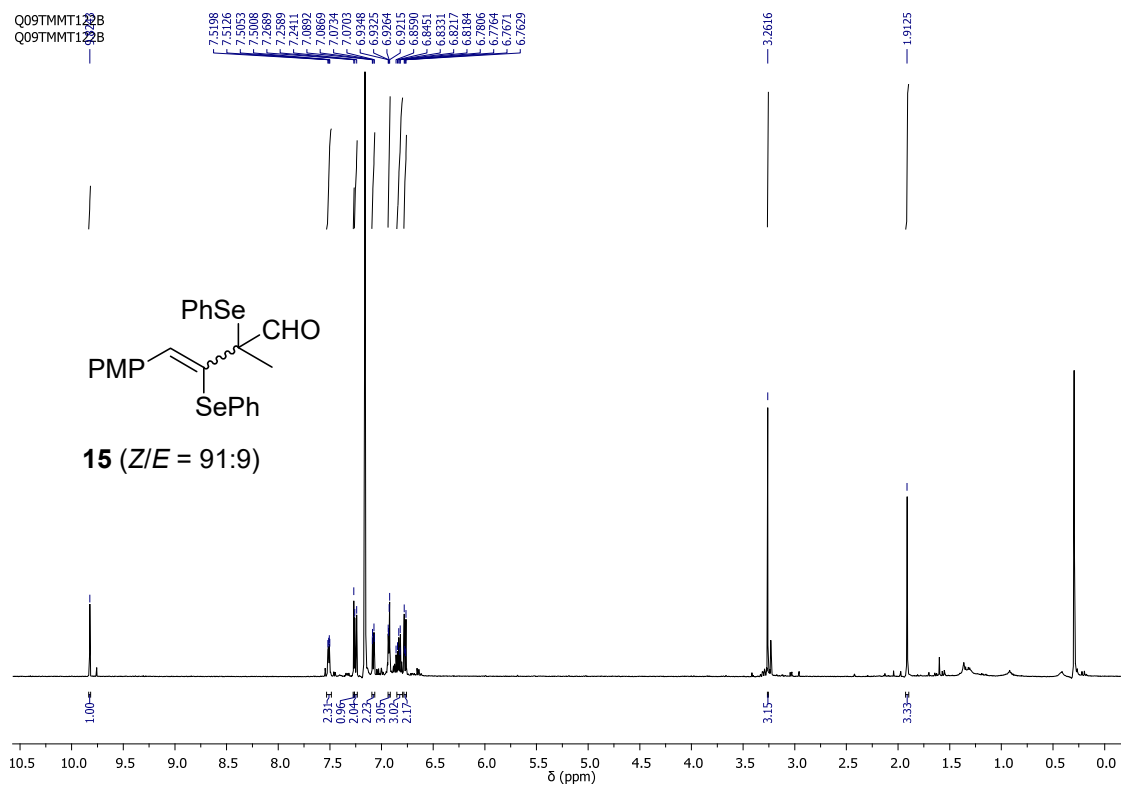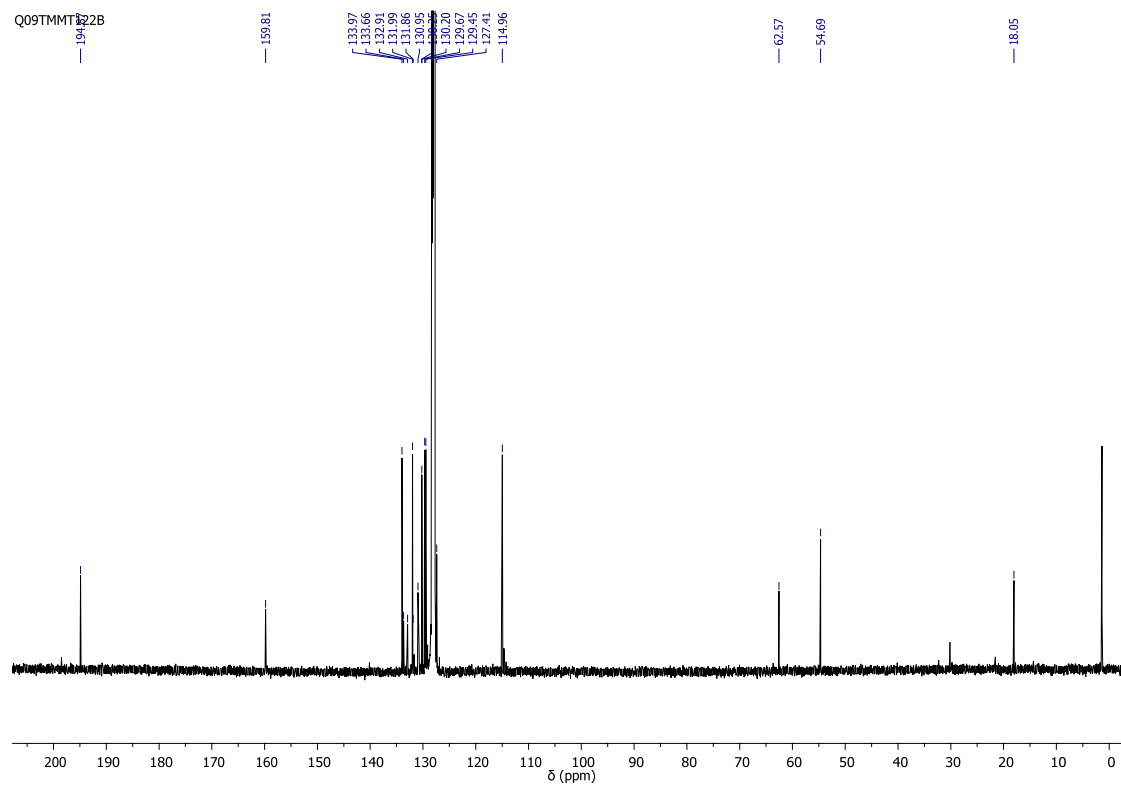



Q09TMMT122B  
Q09TMMT122B 77Se sin filtro

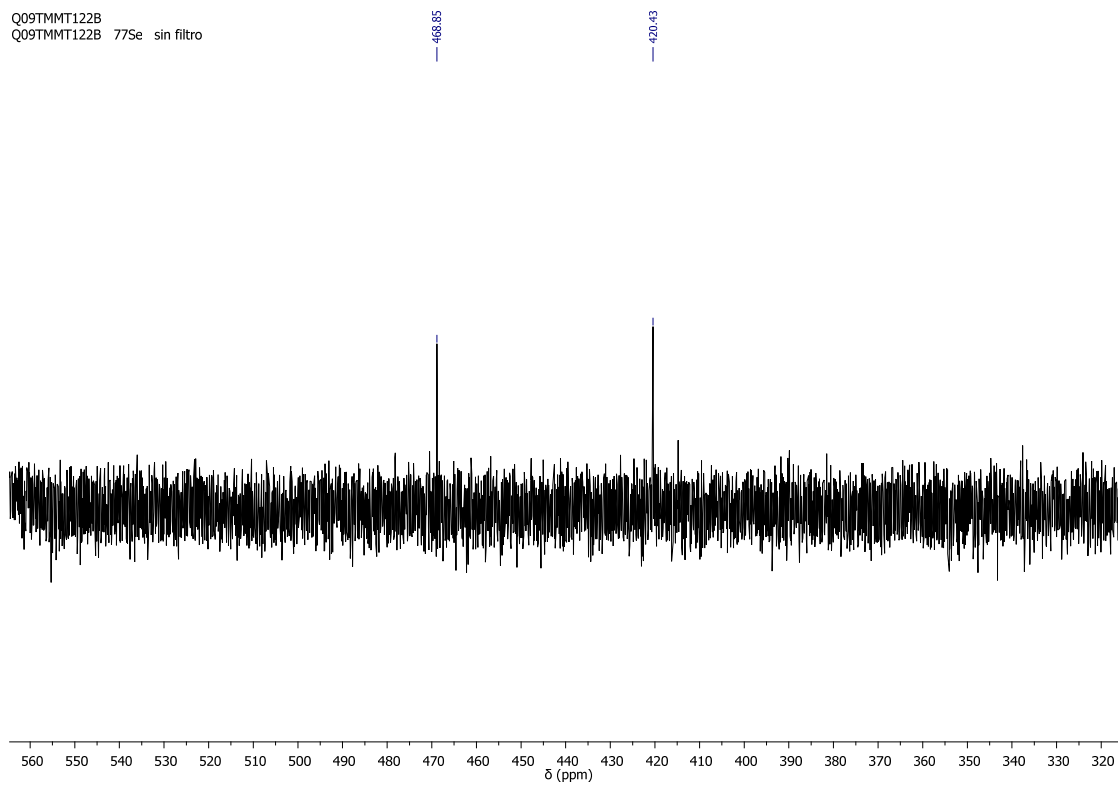

Q09TMMT122D  
Q09TMMT122D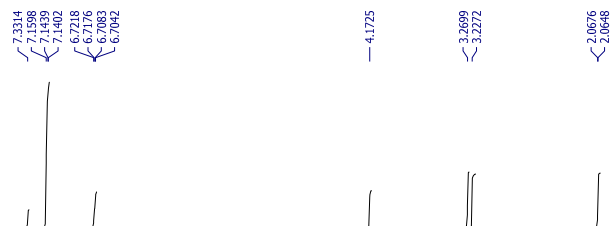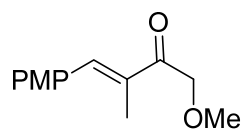**16**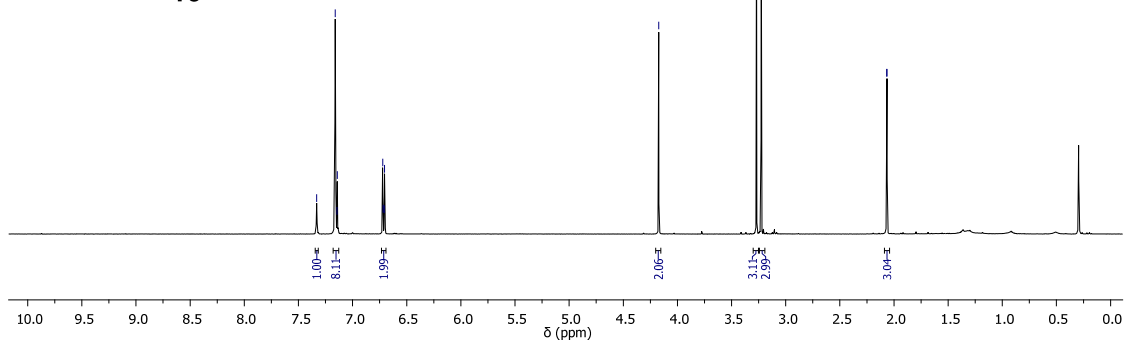Q09TMMT122D  
Q09TMMT122D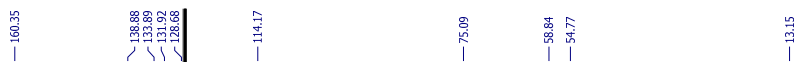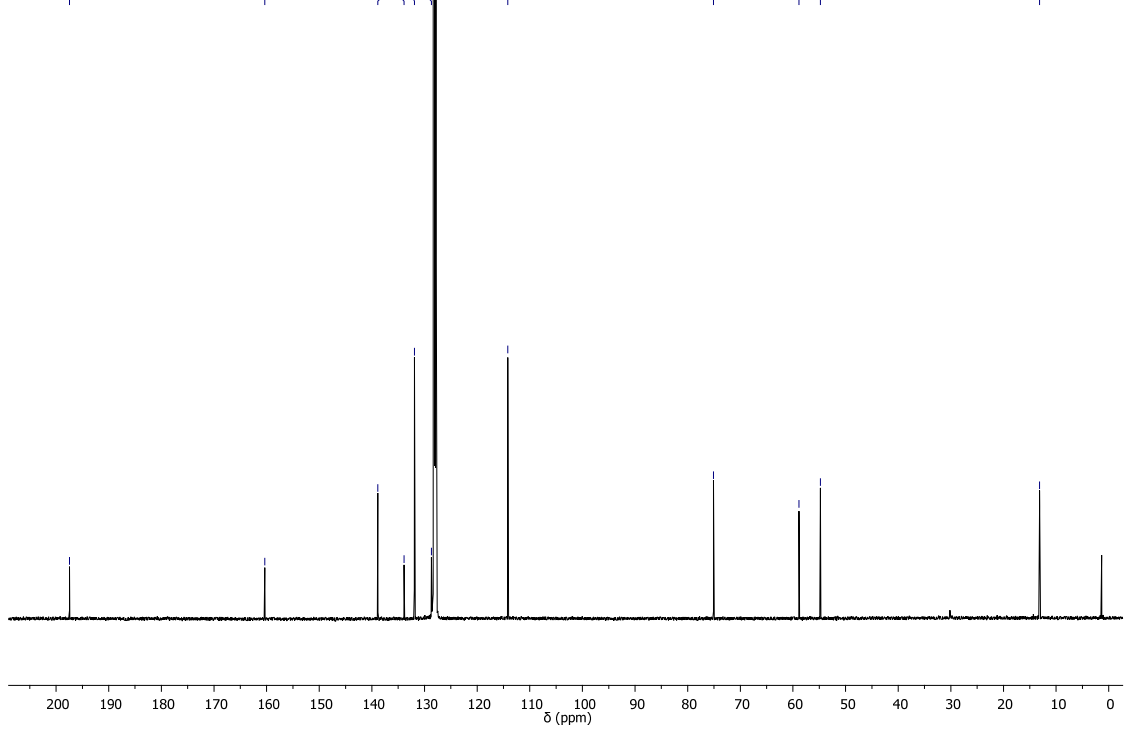

Mar05-2019-Inyector  
Q09TMMT110C1

7.5213  
7.5074  
7.4908  
7.4805  
7.3705  
7.2730  
7.1604  
6.9202  
6.9103  
6.8873  
6.6428  
6.6133

3.2128

1.6132

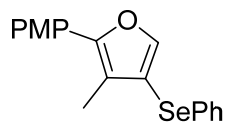

17

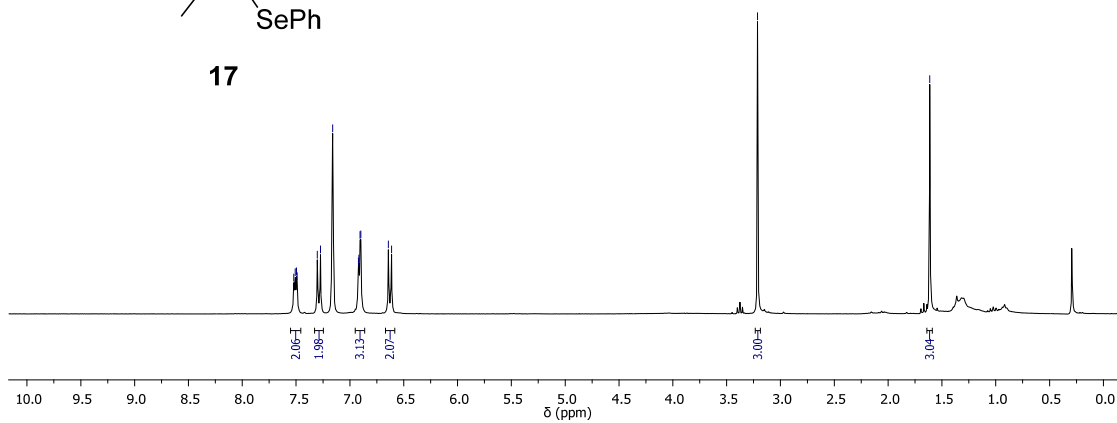

Mar05-2019-Inyector  
Q09TMMT110C1

169.89

160.79

133.37

132.74

129.00

128.97

119.33

114.25

54.76

12.99

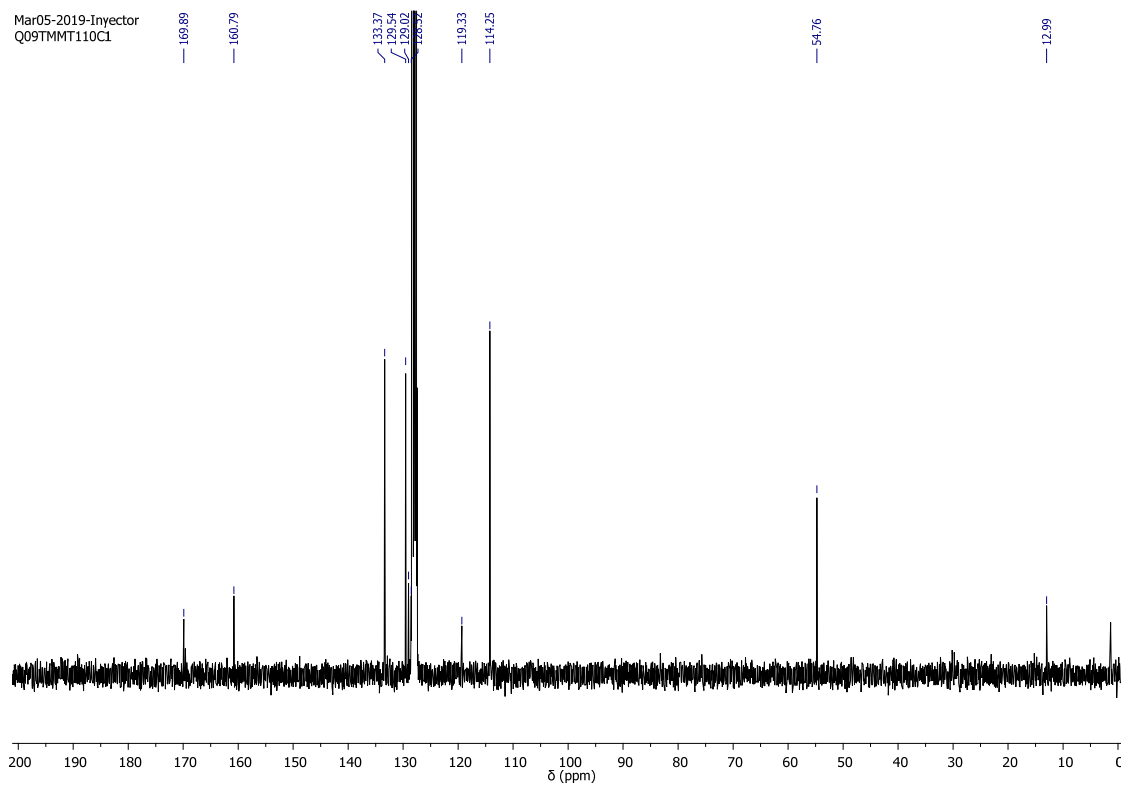

MTP110C  
Q09TMMT110C2 77Se sin filtro

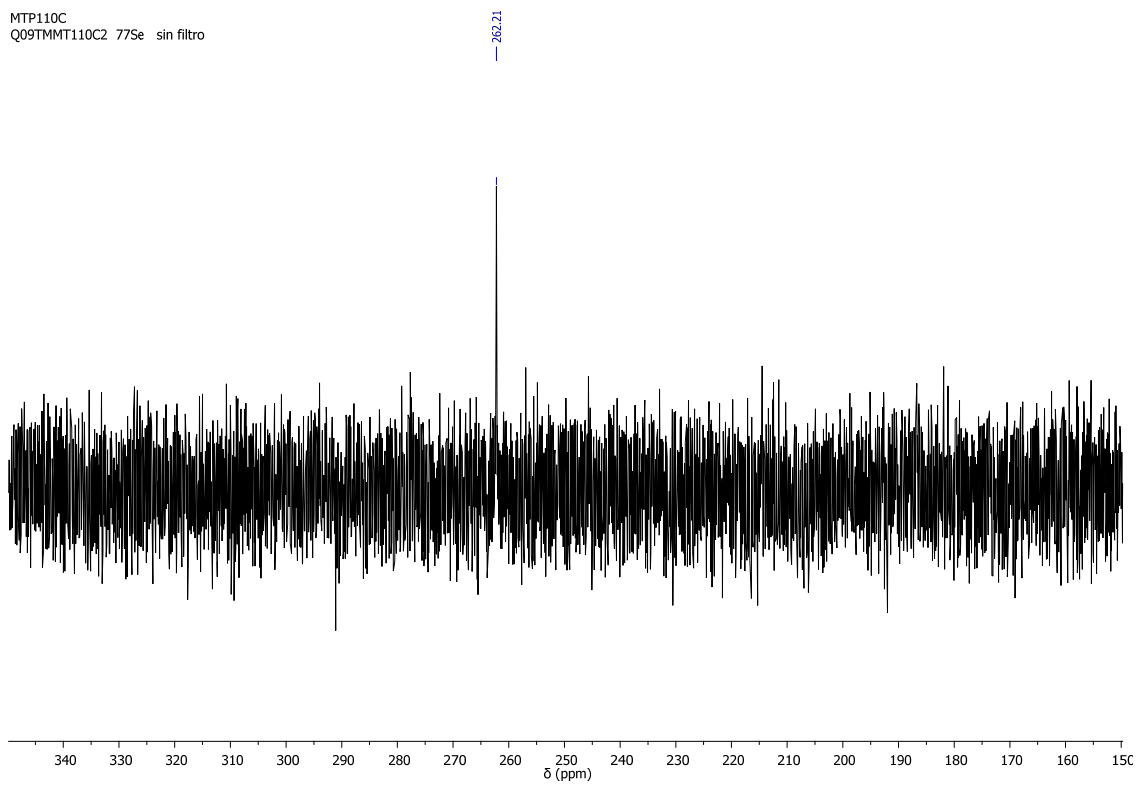

# Qualitative Analysis Report

**Data Filename** 12720\_mtp\_132\_b\_01.d      **Sample Name** mtp\_132\_b  
**Sample Type** Sample      **Position** Vial 2  
**Instrument Name** Instrument 1      **User Name**  
**Acq Method** ESI\_ACN\_75\_pos.m      **IRM Calibration Status** Success  
**DA Method** Defecto\_modificado\_CS.m      **Comment**

## User Spectra

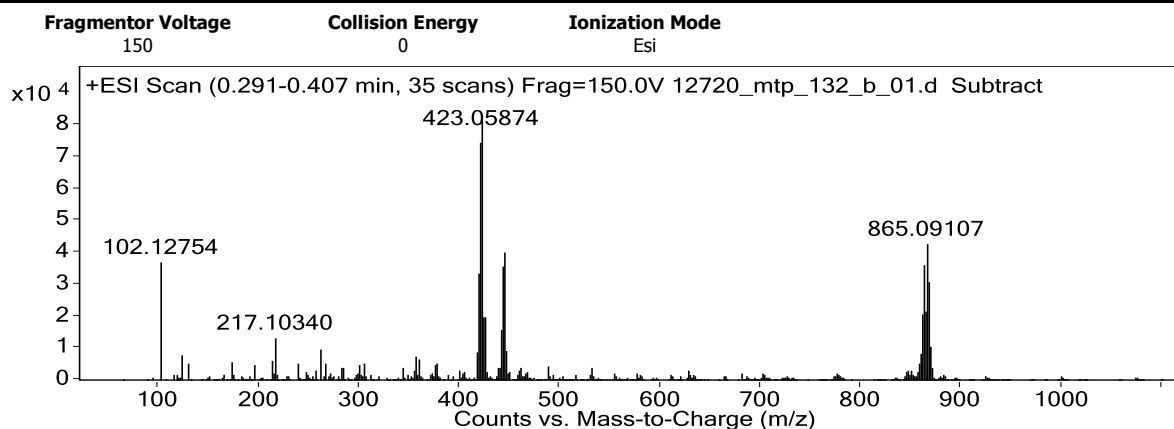

### Peak List

| <i>m/z</i> | <i>z</i> | Abund |
|------------|----------|-------|
| 102.12754  |          | 37012 |
| 419.05788  |          | 33330 |
| 421.05735  | 1        | 74521 |
| 423.05874  | 1        | 81370 |
| 443.03899  | 1        | 35547 |
| 445.04012  | 1        | 39910 |
| 863.09084  | 1        | 36107 |
| 864.09365  | 1        | 21559 |
| 865.09107  | 1        | 42861 |
| 867.09170  | 1        | 30615 |

--- End Of Report ---

# Qualitative Compound Report

|                        |                         |                               |           |
|------------------------|-------------------------|-------------------------------|-----------|
| <b>Data File</b>       | 12720_mtp_132_b_01.d    | <b>Sample Name</b>            | mtp_132_b |
| <b>Sample Type</b>     | Sample                  | <b>Position</b>               | Vial 2    |
| <b>Instrument Name</b> | Instrument 1            | <b>User Name</b>              |           |
| <b>Acq Method</b>      | ESI_ACN_75_pos.m        | <b>IRM Calibration Status</b> | Success   |
| <b>DA Method</b>       | Defecto_modificado_CS.m | <b>Comment</b>                |           |

## Compound Table

| Compound Label             | RT    | Mass      | Abund | Formula             | Tgt Mass | Diff (ppm) |
|----------------------------|-------|-----------|-------|---------------------|----------|------------|
| Cpd 1: C20 H20 [18O] O4 Se | 0.424 | 416.05729 | 7406  | C20 H20 [18O] O4 Se | 416.0578 | -1.21      |

| Compound Label             | RT    | Algorithm       | Mass      |
|----------------------------|-------|-----------------|-----------|
| Cpd 1: C20 H20 [18O] O4 Se | 0.424 | Find By Formula | 416.05729 |

MS Zoomed Spectrum

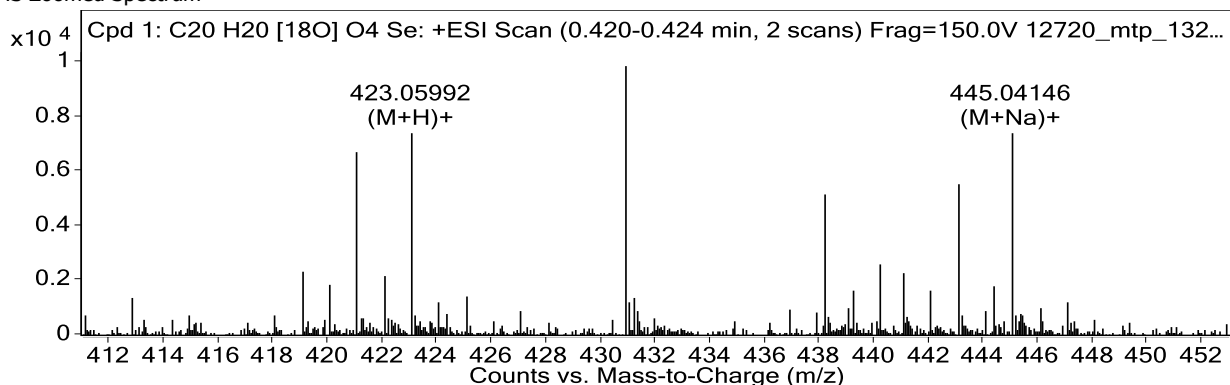

## MS Spectrum Peak List

| m/z       | Calc m/z  | Diff (ppm) | z | Abund | Formula                | Ion     |
|-----------|-----------|------------|---|-------|------------------------|---------|
| 100.07505 |           |            |   | 2493  |                        |         |
| 102.12814 |           |            |   | 66565 |                        |         |
| 102.18457 |           |            |   | 8030  |                        |         |
| 102.25875 |           |            |   | 3055  |                        |         |
| 102.27492 |           |            |   | 2991  |                        |         |
| 103.13217 |           |            |   | 5185  |                        |         |
| 421.0575  | 421.06039 | -6.86      | 1 | 6724  | C20 H21 O4 [18O] Se    | (M+H)+  |
| 423.05992 | 423.05923 | 1.64       | 1 | 7424  | C20 H21 O4 [18O] Se    | (M+H)+  |
| 443.04154 | 443.04233 | -1.79      | 1 | 5540  | C20 H20 Na O4 [18O] Se | (M+Na)+ |
| 445.04146 | 445.04117 | 0.65       | 1 | 7406  | C20 H20 Na O4 [18O] Se | (M+Na)+ |

--- End Of Report ---

C20H20O4[18]OSe +H: C20 H21 O4 [18]O1 Se1 c(gss, s/p...

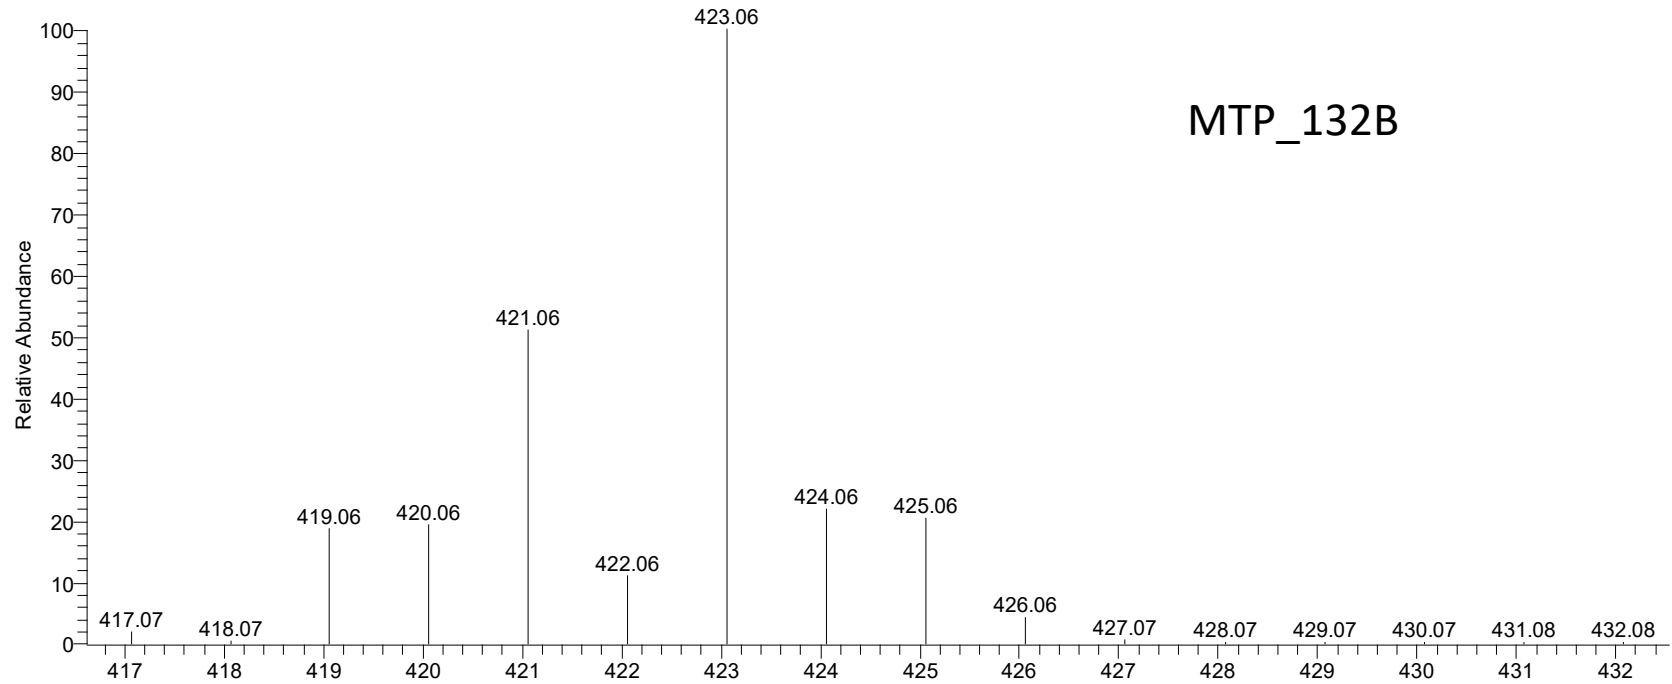

MTP\_132B

C20H20O5Se +H: C20 H21 O5 Se1 c(gss, s/p:40)(Val) Ch...

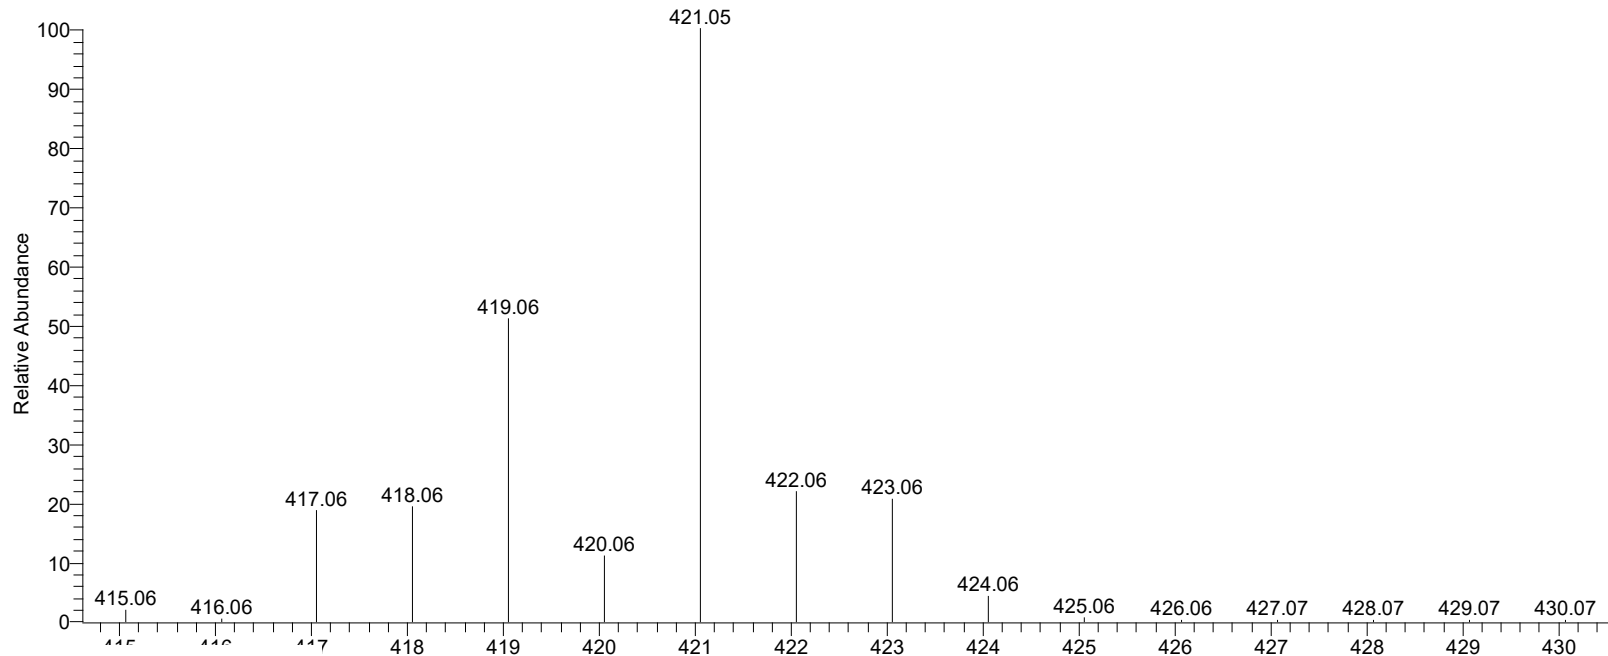

+ESI Scan (0.295-0.414 min, 36 scans) Frag=150.0V 12720\_mtp\_132\_b\_01.d

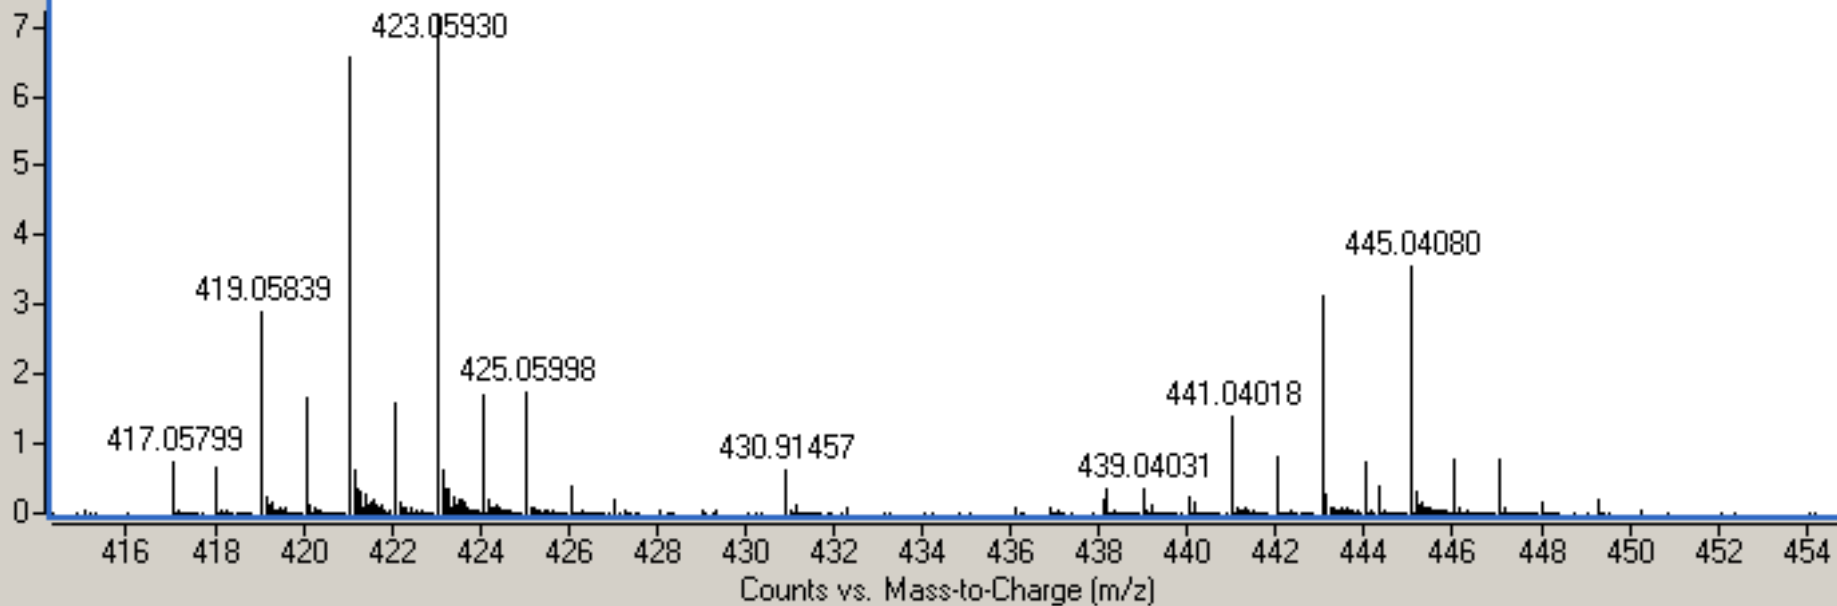

C<sub>20</sub>H<sub>20</sub>O<sub>4</sub>[<sup>18</sup>O]Se\*0.50 + C<sub>20</sub>H<sub>20</sub>O<sub>5</sub>Se\*0.50 +H: c(gss, s/p:4...

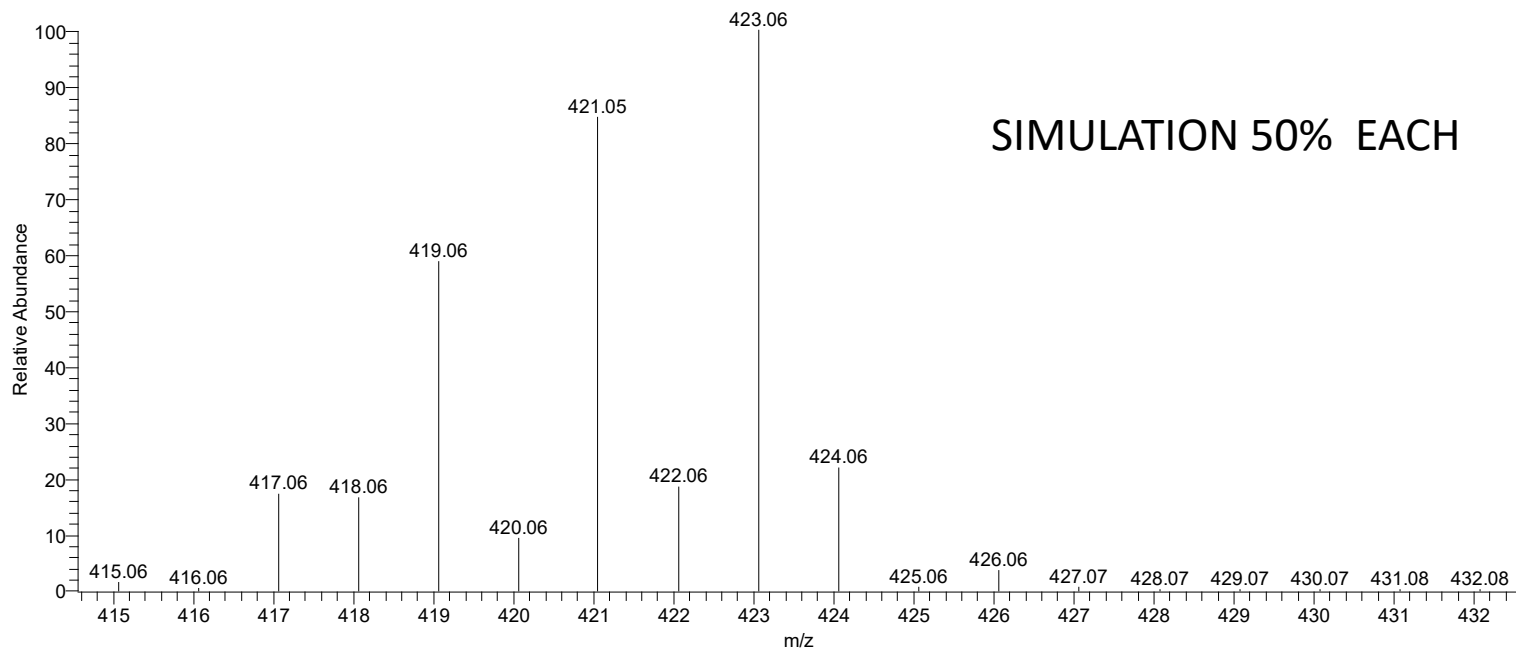

Supplement: c9qo00561g1.pdf [file c9qo00561g1.pdf]
